# Supplementary material
Source: PubMed Central journal article supplement (PMC4860148)
Supplement: NIHMS781112-supplement-Supp_Info.pdf [file NIHMS781112-supplement-Supp_Info.pdf]

Table S1: Primer sequences used in RT-qPCR

| Gene         | Description   | Amplicon Length |
|--------------|---------------|-----------------|
| <i>CD79A</i> | Hs00998119_m1 | 118             |
| <i>IGHD</i>  | Hs00920518_g1 | 62              |
| <i>SPIB</i>  | Hs00162150_m1 | 65              |
| <i>TCLIA</i> | Hs00951350_m1 | 91              |

RT-qPCR was run with the following conditions: 2 min at 50°C, 10 min at 95°C for 1 cycle and 15 s at 95°C, 1 min at 60°C for 40 cycles.

Table S2: up and down regulated genes following CSC stimulation of cultured PBMCs.

| Probe set   | Symbol   | Description                                                | Fold  | P value  |
|-------------|----------|------------------------------------------------------------|-------|----------|
| 202852_s_at | AAGAB    | alpha- and gamma-adaptin binding protein                   | 1.15  | 0.043941 |
| 213353_at   | ABCA5    | ATP-binding cassette, sub-family A (ABC1), member 5        | 1.3   | 0.030279 |
| 209993_at   | ABCB1    | ATP-binding cassette, sub-family B (MDR/TAP), member 1     | 1.43  | 0.040598 |
| 208288_at   | ABCB11   | ATP-binding cassette, sub-family B (MDR/TAP), member 11    | -1.12 | 0.026911 |
| 203192_at   | ABCB6    | ATP-binding cassette, sub-family B (MDR/TAP), member 6     | 1.72  | 0.006919 |
| 215873_x_at | ABCC10   | ATP-binding cassette, sub-family C (CFTR/MRP), member 10   | 1.13  | 0.02512  |
| 203981_s_at | ABCD4    | ATP-binding cassette, sub-family D (ALD), member 4         | 1.37  | 0.00088  |
| 201873_s_at | ABCE1    | ATP-binding cassette, sub-family E (OABP), member 1        | -1.24 | 0.032693 |
| 204567_s_at | ABCG1    | ATP-binding cassette, sub-family G (WHITE), member 1       | 2.04  | 0.005918 |
| 213017_at   | ABHD3    | abhydrolase domain containing 3                            | 1.14  | 0.033643 |
| 218581_at   | ABHD4    | abhydrolase domain containing 4                            | 1.24  | 0.032239 |
| 200965_s_at | ABLIM1   | actin binding LIM protein 1                                | 1.47  | 0.012157 |
| 204565_at   | ACOT13   | acyl-CoA thioesterase 13                                   | 1.36  | 0.029471 |
| 208636_at   | ACTN1    | actinin, alpha 1                                           | -1.77 | 0.02005  |
| 222230_s_at | ACTR10   | actin-related protein 10 homolog ( <i>S. cerevisiae</i> )  | 1.18  | 0.008379 |
| 213102_at   | ACTR3    | ARP3 actin-related protein 3 homolog (yeast)               | -1.26 | 0.010611 |
| 208219_at   | ACVR1B   | activin A receptor, type IB                                | -1.1  | 0.045692 |
| 206833_s_at | ACYP2    | acylphosphatase 2, muscle type                             | 1.18  | 0.027131 |
| 213790_at   | ADAM12   | ADAM metallopeptidase domain 12                            | -1.13 | 0.03353  |
| 213532_at   | ADAM17   | ADAM metallopeptidase domain 17                            | 1.77  | 0.005138 |
| 205180_s_at | ADAM8    | ADAM metallopeptidase domain 8                             | -1.25 | 0.006237 |
| 220208_at   | ADAMTS13 | ADAM metallopeptidase with thrombospondin type 1 motif, 13 | -1.05 | 0.04569  |
| 44120_at    | ADCK2    | aarF domain containing kinase 2                            | 1.22  | 0.016402 |
| 203741_s_at | ADCY7    | adenylate cyclase 7                                        | 1.38  | 0.013632 |
| 208030_s_at | ADD1     | adducin 1 (alpha)                                          | 1.2   | 0.036888 |
| 208847_s_at | ADH5     | alcohol dehydrogenase 5 (class III), chi polypeptide       | 1.14  | 0.031611 |
| 210250_x_at | ADSL     | adenylosuccinate lyase                                     | -1.38 | 0.037356 |
| 217939_s_at | AFTPH    | aftiphilin                                                 | 1.36  | 0.010502 |
| 222362_at   | AGFG2    | ArfGAP with FG repeats 2                                   | -1.13 | 0.010635 |
| 222132_s_at | AGK      | acylglycerol kinase                                        | -1.35 | 0.027575 |
| 220602_s_at | AGSK1    | golgin subfamily A member 2-like*                          | 1.18  | 0.021868 |
| 220841_s_at | AHI1     | Abelson helper integration site 1                          | -1.31 | 0.029924 |
| 215051_x_at | AIF1     | allograft inflammatory factor 1                            | -1.67 | 0.046584 |
| 220289_s_at | AIM1L    | absent in melanoma 1-like                                  | -1.08 | 0.036502 |
| 212173_at   | AK2      | adenylate kinase 2                                         | -1.4  | 0.015064 |

|             |          |                                                                                                                                                            |       |          |
|-------------|----------|------------------------------------------------------------------------------------------------------------------------------------------------------------|-------|----------|
| 203624_at   | AKAP17A  | A kinase (PRKA) anchor protein 17A                                                                                                                         | 1.33  | 0.01779  |
| 211653_x_at | AKR1C2   | aldo-keto reductase family 1, member C2<br>(dihydrodiol dehydrogenase 2; bile acid binding<br>protein; 3-alpha hydroxysteroid dehydrogenase, type<br>III)* | 1.12  | 0.03285  |
| 217791_s_at | ALDH18A1 | aldehyde dehydrogenase 18 family, member A1                                                                                                                | -1.25 | 0.011136 |
| 212224_at   | ALDH1A1  | aldehyde dehydrogenase 1 family, member A1                                                                                                                 | -1.12 | 0.000394 |
| 219374_s_at | ALG9     | asparagine-linked glycosylation 9, alpha-1,2-<br>mannosyltransferase homolog ( <i>S. cerevisiae</i> )                                                      | 1.2   | 0.015494 |
| 208211_s_at | ALK      | anaplastic lymphoma receptor tyrosine kinase                                                                                                               | -1.13 | 0.033761 |
| 206837_at   | ALX1     | ALX homeobox 1                                                                                                                                             | -1.12 | 0.025456 |
| 209001_s_at | ANAPC13  | anaphase promoting complex subunit 13                                                                                                                      | -1.36 | 0.021837 |
| 204218_at   | ANAPC15  | anaphase promoting complex subunit 15                                                                                                                      | -1.42 | 0.001064 |
| 217630_at   | ANGEL2   | angel homolog 2 ( <i>Drosophila</i> )                                                                                                                      | -1.08 | 0.045103 |
| 212286_at   | ANKRD12  | ankyrin repeat domain 12                                                                                                                                   | 1.62  | 0.005518 |
| 221522_at   | ANKRD27  | ankyrin repeat domain 27 (VPS9 domain)                                                                                                                     | 1.14  | 0.03053  |
| 213035_at   | ANKRD28  | ankyrin repeat domain 28                                                                                                                                   | -1.2  | 0.028443 |
| 212731_at   | ANKRD46  | ankyrin repeat domain 46                                                                                                                                   | 1.39  | 0.009446 |
| 219069_at   | ANKRD49  | ankyrin repeat domain 49                                                                                                                                   | 1.26  | 0.014395 |
| 218910_at   | ANO10    | anoctamin 10                                                                                                                                               | 1.27  | 0.030359 |
| 201051_at   | ANP32A   | acidic (leucine-rich) nuclear phosphoprotein 32<br>family, member A                                                                                        | -1.22 | 0.010869 |
| 221505_at   | ANP32E   | acidic (leucine-rich) nuclear phosphoprotein 32<br>family, member E                                                                                        | -1.3  | 0.022243 |
| 205639_at   | AOAH     | acyloxyacyl hydrolase (neutrophil)                                                                                                                         | -1.47 | 0.049025 |
| 203350_at   | APIG1    | adaptor-related protein complex 1, gamma 1 subunit                                                                                                         | 1.25  | 0.030681 |
| 202399_s_at | AP3S2    | adaptor-related protein complex 3, sigma 2 subunit*                                                                                                        | 1.7   | 0.009902 |
| 209871_s_at | APBA2    | amyloid beta (A4) precursor protein-binding, family<br>A, member 2                                                                                         | -1.14 | 0.03965  |
| 203527_s_at | APC      | adenomatous polyposis coli                                                                                                                                 | -1.13 | 0.010339 |
| 211404_s_at | APLP2    | amyloid beta (A4) precursor-like protein 2                                                                                                                 | 1.55  | 0.014741 |
| 205108_s_at | APOB     | apolipoprotein B (including Ag(x) antigen)                                                                                                                 | -1.15 | 0.000618 |
| 206632_s_at | APOBEC3B | apolipoprotein B mRNA editing enzyme, catalytic<br>polypeptide-like 3B                                                                                     | -1.64 | 0.033729 |
| 221031_s_at | APOLD1   | apolipoprotein L domain containing 1                                                                                                                       | 1.36  | 0.031192 |
| 214910_s_at | APOM     | apolipoprotein M                                                                                                                                           | -1.18 | 0.044541 |
| 202629_at   | APPBP2   | amyloid beta precursor protein (cytoplasmic tail)<br>binding protein 2                                                                                     | 1.2   | 0.023668 |
| 39249_at    | AQP3     | aquaporin 3 (Gill blood group)                                                                                                                             | -1.22 | 0.015313 |
| 215955_x_at | ARHGAP26 | Rho GTPase activating protein 26                                                                                                                           | -1.19 | 0.013591 |
| 201288_at   | ARHGDIB  | Rho GDP dissociation inhibitor (GDI) beta                                                                                                                  | -1.28 | 0.005083 |
| 216620_s_at | ARHGEF10 | Rho guanine nucleotide exchange factor (GEF) 10                                                                                                            | -1.2  | 0.011484 |
| 201333_s_at | ARHGEF12 | Rho guanine nucleotide exchange factor (GEF) 12                                                                                                            | 1.15  | 0.042244 |
| 208009_s_at | ARHGEF16 | Rho guanine nucleotide exchange factor (GEF) 16                                                                                                            | -1.22 | 0.028834 |
| 203264_s_at | ARHGEF9  | Cdc42 guanine nucleotide exchange factor (GEF) 9                                                                                                           | -1.2  | 0.010716 |
| 202092_s_at | ARL2BP   | ADP-ribosylation factor-like 2 binding protein                                                                                                             | 1.15  | 0.007476 |

|             |          |                                                                                           |       |          |
|-------------|----------|-------------------------------------------------------------------------------------------|-------|----------|
| 202207_at   | ARL4C    | ADP-ribosylation factor-like 4C                                                           | 1.9   | 0.023677 |
| 203586_s_at | ARL4D    | ADP-ribosylation factor-like 4D                                                           | -1.07 | 0.031574 |
| 208679_s_at | ARPC2    | actin related protein 2/3 complex, subunit 2, 34kDa                                       | -1.39 | 0.000044 |
| 218832_x_at | ARRB1    | arrestin, beta 1                                                                          | -1.58 | 0.013006 |
| 213702_x_at | ASAH1    | N-acylsphingosine amidohydrolase (acid ceramidase) 1                                      | 1.67  | 0.021011 |
| 205673_s_at | ASB9     | ankyrin repeat and SOCS box containing 9                                                  | -1.23 | 0.016353 |
| 36553_at    | ASMTL    | acetylserotonin O-methyltransferase-like                                                  | 1.2   | 0.032801 |
| 206030_at   | ASPA     | aspartoacylase                                                                            | -1.09 | 0.037977 |
| 209135_at   | ASPH     | aspartate beta-hydroxylase                                                                | 1.39  | 0.026443 |
| 214993_at   | ASPHD1   | aspartate beta-hydroxylase domain containing 1                                            | -1.06 | 0.044282 |
| 213197_at   | ASTN1    | astrotactin 1                                                                             | -1.07 | 0.027742 |
| 202672_s_at | ATF3     | activating transcription factor 3                                                         | 1.79  | 0.015017 |
| 204568_at   | ATG14    | autophagy related 14                                                                      | 1.43  | 0.00433  |
| 219164_s_at | ATG2B    | autophagy related 2B                                                                      | 1.35  | 0.014661 |
| 208758_at   | ATIC     | 5-aminoimidazole-4-carboxamide ribonucleotide formyltransferase/IMP cyclohydrolase        | -1.58 | 0.016583 |
| 201854_s_at | ATMIN    | ATM interactor                                                                            | 1.57  | 0.000143 |
| 212361_s_at | ATP2A2   | ATPase, Ca <sup>++</sup> transporting, cardiac muscle, slow twitch 2                      | -1.21 | 0.025016 |
| 205410_s_at | ATP2B4   | ATPase, Ca <sup>++</sup> transporting, plasma membrane 4                                  | -1.19 | 0.029124 |
| 209934_s_at | ATP2C1   | ATPase, Ca <sup>++</sup> transporting, type 2C, member 1                                  | 1.35  | 0.037467 |
| 211755_s_at | ATP5F1   | ATP synthase, H <sup>+</sup> transporting, mitochondrial Fo complex, subunit B1           | -1.16 | 0.026034 |
| 210149_s_at | ATP5H    | ATP synthase, H <sup>+</sup> transporting, mitochondrial Fo complex, subunit d            | 1.07  | 0.04637  |
| 206992_s_at | ATP5S    | ATP synthase, H <sup>+</sup> transporting, mitochondrial Fo complex, subunit s (factor B) | -1.3  | 0.000501 |
| 218038_at   | ATP5SL   | ATP5S-like                                                                                | 1.12  | 0.028622 |
| 207809_s_at | ATP6AP1  | ATPase, H <sup>+</sup> transporting, lysosomal accessory protein 1                        | 1.29  | 0.039788 |
| 205095_s_at | ATP6V0A1 | ATPase, H <sup>+</sup> transporting, lysosomal V0 subunit a1                              | 1.11  | 0.049458 |
| 201172_x_at | ATP6V0E1 | ATPase, H <sup>+</sup> transporting, lysosomal 9kDa, V0 subunit e1                        | 1.34  | 0.005391 |
| 208898_at   | ATP6V1D  | ATPase, H <sup>+</sup> transporting, lysosomal 34kDa, V1 subunit D                        | 1.43  | 0.000961 |
| 208832_at   | ATXN10   | ataxin 10                                                                                 | -1.31 | 0.023542 |
| 205415_s_at | ATXN3    | ataxin 3                                                                                  | 1.53  | 0.031136 |
| 206251_s_at | AVPR1A   | arginine vasopressin receptor 1A                                                          | -1.08 | 0.048016 |
| 208108_s_at | AVPR2    | arginine vasopressin receptor 2                                                           | -1.15 | 0.028492 |
| 203304_at   | BAMBI    | BMP and activin membrane-bound inhibitor homolog (Xenopus laevis)                         | 1.17  | 0.041552 |
| 220358_at   | BATF3    | basic leucine zipper transcription factor, ATF-like 3                                     | -2.71 | 0.017458 |
| 218471_s_at | BBS1     | Bardet-Biedl syndrome 1                                                                   | 1.19  | 0.004954 |
| 212744_at   | BBS4     | Bardet-Biedl syndrome 4                                                                   | 1.21  | 0.013035 |
| 217955_at   | BCL2L13  | BCL2-like 13 (apoptosis facilitator)                                                      | 1.48  | 0.001117 |
| 221241_s_at | BCL2L14  | BCL2-like 14 (apoptosis facilitator)                                                      | -1.2  | 0.005739 |

|             |           |                                                             |       |          |
|-------------|-----------|-------------------------------------------------------------|-------|----------|
| 219433_at   | BCOR      | BCL6 corepressor                                            | 1.35  | 0.029343 |
| 219670_at   | BEND5     | BEN domain containing 5                                     | -1.28 | 0.02002  |
| 218056_at   | BFAR      | bifunctional apoptosis regulator                            | 1.35  | 0.046973 |
| 207399_at   | BFSP2     | beaded filament structural protein 2, phakinin              | -1.15 | 0.019505 |
| 206119_at   | BHMT      | betaine--homocysteine S-methyltransferase                   | -1.19 | 0.032393 |
| 220580_at   | BICC1     | bicaudal C homolog 1 (Drosophila)                           | -1.1  | 0.013374 |
| 219191_s_at | BIN2      | bridging integrator 2                                       | 1.17  | 0.038095 |
| 201032_at   | BLCAP     | bladder cancer associated protein                           | 1.16  | 0.028705 |
| 202201_at   | BLVRB     | biliverdin reductase B (flavin reductase (NADPH))           | 1.65  | 0.004043 |
| 205574_x_at | BMP1      | bone morphogenetic protein 1                                | -1.18 | 0.007064 |
| 221479_s_at | BNIP3L    | BCL2/adenovirus E1B 19kDa interacting protein 3-like        | 1.35  | 0.044419 |
| 216397_s_at | BOP1      | block of proliferation 1                                    | -1.24 | 0.042315 |
| 209922_at   | BRAP      | BRCA1 associated protein                                    | 1.2   | 0.044419 |
| 214727_at   | BRCA2     | breast cancer 2, early onset                                | -1.35 | 0.01028  |
| 214911_s_at | BRD2      | bromodomain containing 2                                    | 1.43  | 0.046173 |
| 202227_s_at | BRD8      | bromodomain containing 8                                    | 1.29  | 0.00516  |
| 212645_x_at | BRE       | brain and reproductive organ-expressed (TNFRSF1A modulator) | -1.22 | 0.043862 |
| 204481_at   | BRPF1     | bromodomain and PHD finger containing, 1                    | 1.24  | 0.033283 |
| 222200_s_at | BSDC1     | BSD domain containing 1                                     | 1.34  | 0.002537 |
| 201236_s_at | BTG2      | BTG family, member 2                                        | 1.69  | 0.00183  |
| 204821_at   | BTN3A3    | butyrophilin, subfamily 3, member A3                        | -1.24 | 0.045545 |
| 217809_at   | BZW2      | basic leucine zipper and W2 domains 2                       | -1.4  | 0.007879 |
| 220344_at   | C11orf16  | chromosome 11 open reading frame 16                         | -1.09 | 0.027473 |
| 203257_s_at | C11orf49  | chromosome 11 open reading frame 49                         | 1.3   | 0.018458 |
| 221599_at   | C11orf67  | chromosome 11 open reading frame 67                         | 1.68  | 0.000204 |
| 211034_s_at | C12orf51  | chromosome 12 open reading frame 51                         | 1.24  | 0.045051 |
| 218820_at   | C14orf132 | chromosome 14 open reading frame 132                        | -1.18 | 0.023405 |
| 215087_at   | C15orf39  | chromosome 15 open reading frame 39                         | -1.1  | 0.024971 |
| 219784_at   | C16orf95  | chromosome 16 open reading frame 95                         | -1.13 | 0.032509 |
| 203830_at   | C17orf75  | chromosome 17 open reading frame 75                         | 1.18  | 0.015005 |
| 218896_s_at | C17orf85  | chromosome 17 open reading frame 85                         | 1.23  | 0.021779 |
| 209574_s_at | C18orf1   | chromosome 18 open reading frame 1                          | 1.53  | 0.013729 |
| 214357_at   | C1orf105  | chromosome 1 open reading frame 105                         | -1.05 | 0.047032 |
| 218546_at   | C1orf115  | chromosome 1 open reading frame 115                         | 1.1   | 0.026889 |
| 222281_s_at | C1orf186* | chromosome 1 open reading frame 186*                        | -1.19 | 0.0176   |
| 207571_x_at | C1orf38   | chromosome 1 open reading frame 38                          | 1.34  | 0.023389 |
| 219406_at   | C1orf50   | chromosome 1 open reading frame 50                          | 1.32  | 0.000993 |
| 205103_at   | C1orf61   | chromosome 1 open reading frame 61                          | -1.19 | 0.016803 |
| 203429_s_at | C1orf9    | chromosome 1 open reading frame 9                           | 1.42  | 0.04197  |
| 218232_at   | C1QA      | complement component 1, q subcomponent, A chain             | -1.13 | 0.0141   |
| 209020_at   | C20orf111 | chromosome 20 open reading frame 111                        | 1.43  | 0.042467 |
| 217835_x_at | C20orf24  | chromosome 20 open reading frame 24*                        | 1.18  | 0.044279 |

|             |          |                                                                |       |          |
|-------------|----------|----------------------------------------------------------------|-------|----------|
| 206656_s_at | C20orf3  | chromosome 20 open reading frame 3                             | 1.27  | 0.010036 |
| 218089_at   | C20orf4  | chromosome 20 open reading frame 4                             | 1.16  | 0.021807 |
| 207701_at   | C22orf24 | chromosome 22 open reading frame 24                            | -1.18 | 0.00785  |
| 209906_at   | C3AR1    | complement component 3a receptor 1                             | -1.53 | 0.002061 |
| 219114_at   | C3orf18  | chromosome 3 open reading frame 18                             | -1.16 | 0.019995 |
| 201812_s_at | C4orf46  | chromosome 4 open reading frame 46*                            | 1.31  | 0.013369 |
| 207698_at   | C6orf123 | chromosome 6 open reading frame 123                            | -1.05 | 0.028163 |
| 220659_s_at | C7orf43  | chromosome 7 open reading frame 43                             | -1.12 | 0.009188 |
| 219464_at   | CA14     | carbonic anhydrase XIV                                         | -1.2  | 0.022838 |
| 221003_s_at | CAB39L   | calcium binding protein 39-like                                | 1.21  | 0.041399 |
| 205625_s_at | CALB1    | calbindin 1, 28kDa                                             | -1.11 | 0.01344  |
| 205428_s_at | CALB2    | calbindin 2                                                    | -1.11 | 0.022112 |
| 210817_s_at | CALCOCO2 | calcium binding and coiled-coil domain 2                       | 1.32  | 0.039348 |
| 221879_at   | CALML4   | calmodulin-like 4                                              | -1.24 | 0.039941 |
| 210787_s_at | CAMKK2   | calcium/calmodulin-dependent protein kinase kinase 2, beta     | -1.13 | 0.049949 |
| 205166_at   | CAPN5    | calpain 5                                                      | -1.1  | 0.009972 |
| 203356_at   | CAPN7    | calpain 7                                                      | 1.45  | 0.010618 |
| 201949_x_at | CAPZB    | capping protein (actin filament) muscle Z-line, beta           | -1.11 | 0.037916 |
| 217940_s_at | CARKD    | carbohydrate kinase domain containing                          | 1.29  | 0.01374  |
| 209970_x_at | CASP1    | caspase 1, apoptosis-related cysteine peptidase                | -1.58 | 0.013204 |
| 207500_at   | CASP5    | caspase 5, apoptosis-related cysteine peptidase                | -1.09 | 0.042144 |
| 208204_s_at | CAV3     | caveolin 3                                                     | -1.2  | 0.001558 |
| 202370_s_at | CBFB     | core-binding factor, beta subunit                              | -1.17 | 0.049507 |
| 203450_at   | CBY1     | chibby homolog 1 (Drosophila)                                  | 1.24  | 0.023383 |
| 209479_at   | CCDC28A  | coiled-coil domain containing 28A                              | 1.44  | 0.009235 |
| 218722_s_at | CCDC51   | coiled-coil domain containing 51                               | -1.39 | 0.043576 |
| 218628_at   | CCDC53   | coiled-coil domain containing 53                               | 1.29  | 0.002292 |
| 212886_at   | CCDC69   | coiled-coil domain containing 69                               | 1.36  | 0.033996 |
| 219774_at   | CCDC93   | coiled-coil domain containing 93                               | 1.21  | 0.004292 |
| 206407_s_at | CCL13    | chemokine (C-C motif) ligand 13                                | -1.47 | 0.017808 |
| 214038_at   | CCL8     | chemokine (C-C motif) ligand 8                                 | -7.06 | 0.00375  |
| 200952_s_at | CCND2    | cyclin D2                                                      | -2.77 | 0.017205 |
| 204093_at   | CCNH     | cyclin H                                                       | -1.25 | 0.013392 |
| 214151_s_at | CCPG1    | cell cycle progression 1*                                      | 1.22  | 0.008642 |
| 206337_at   | CCR7     | chemokine (C-C motif) receptor 7                               | 1.51  | 0.006646 |
| 208059_at   | CCR8     | chemokine (C-C motif) receptor 8                               | -1.28 | 0.01515  |
| 207840_at   | CD160    | CD160 molecule                                                 | -1.23 | 0.027329 |
| 217072_at   | CD300A   | CD300a molecule                                                | -1.13 | 0.037121 |
| 219343_at   | CDC37L1  | cell division cycle 37 homolog ( <i>S. cerevisiae</i> )-like 1 | 1.47  | 0.012159 |
| 204126_s_at | CDC45    | cell division cycle 45 homolog ( <i>S. cerevisiae</i> )        | -1.43 | 0.046221 |
| 221436_s_at | CDCA3    | cell division cycle associated 3                               | -1.61 | 0.046714 |
| 218451_at   | CDCP1    | CUB domain containing protein 1                                | 1.28  | 0.045826 |

|             |          |                                                                                                   |       |          |
|-------------|----------|---------------------------------------------------------------------------------------------------|-------|----------|
| 203256_at   | CDH3     | cadherin 3, type 1, P-cadherin (placental)                                                        | -1.3  | 0.034566 |
| 201253_s_at | CDIPT    | CDP-diacylglycerol--inositol 3-phosphatidyltransferase                                            | 1.4   | 0.000901 |
| 207318_s_at | CDK13    | cyclin-dependent kinase 13                                                                        | 1.42  | 0.002454 |
| 212897_at   | CDK19    | cyclin-dependent kinase 19                                                                        | 1.41  | 0.01051  |
| 207188_at   | CDK3     | cyclin-dependent kinase 3*                                                                        | -1.18 | 0.026803 |
| 219831_at   | CDKL3    | cyclin-dependent kinase-like 3                                                                    | 1.2   | 0.026414 |
| 210240_s_at | CDKN2D   | cyclin-dependent kinase inhibitor 2D (p19, inhibits CDK4)                                         | -1.28 | 0.015672 |
| 212864_at   | CDS2     | CDP-diacylglycerol synthase (phosphatidate cytidylyltransferase) 2                                | 1.31  | 0.01367  |
| 213554_s_at | CDV3     | CDV3 homolog (mouse)                                                                              | 1.29  | 0.006937 |
| 209498_at   | CEACAM1  | carcinoembryonic antigen-related cell adhesion molecule 1 (biliary glycoprotein)                  | -1.86 | 0.002494 |
| 217209_at   | CEACAM3  | carcinoembryonic antigen-related cell adhesion molecule 3                                         | -1.09 | 0.035561 |
| 204203_at   | CEBPG    | CCAAT/enhancer binding protein (C/EBP), gamma                                                     | 1.3   | 0.043979 |
| 218741_at   | CENPM    | centromere protein M                                                                              | -1.34 | 0.03286  |
| 204075_s_at | CEP104   | centrosomal protein 104kDa                                                                        | 1.14  | 0.004071 |
| 206003_at   | CEP135   | centrosomal protein 135kDa                                                                        | -1.23 | 0.034688 |
| 221683_s_at | CEP290   | centrosomal protein 290kDa                                                                        | 1.12  | 0.023133 |
| 219375_at   | CEPT1    | choline/ethanolamine phosphotransferase 1                                                         | 1.2   | 0.024283 |
| 202357_s_at | CFB      | complement factor B                                                                               | -1.12 | 0.0462   |
| 211316_x_at | CFLAR    | CASP8 and FADD-like apoptosis regulator                                                           | 1.42  | 0.01436  |
| 217026_at   | CFTR     | cystic fibrosis transmembrane conductance regulator (ATP-binding cassette sub-family C, member 7) | -1.12 | 0.026495 |
| 204605_at   | CGRRF1   | cell growth regulator with ring finger domain 1                                                   | 1.53  | 0.006534 |
| 212313_at   | CHMP7    | charged multivesicular body protein 7                                                             | 1.47  | 0.01657  |
| 214665_s_at | CHP1     | calcineurin-like EF hand protein 1                                                                | 1.17  | 0.049118 |
| 55093_at    | CHPF2    | chondroitin polymerizing factor 2                                                                 | 1.53  | 0.005841 |
| 221675_s_at | CHPT1    | choline phosphotransferase 1                                                                      | 1.32  | 0.029685 |
| 209763_at   | CHRD1    | chordin-like 1                                                                                    | -1.09 | 0.013522 |
| 211772_x_at | CHRNA3   | cholinergic receptor, nicotinic, alpha 3 (neuronal)                                               | -1.08 | 0.024801 |
| 205567_at   | CHST1    | carbohydrate (keratan sulfate Gal-6) sulfotransferase 1                                           | -1.15 | 0.04229  |
| 221188_s_at | CIDEB    | cell death-inducing DFFA-like effector b                                                          | -1.22 | 0.014066 |
| 200999_s_at | CKAP4    | cytoskeleton-associated protein 4                                                                 | 1.35  | 0.018929 |
| 207855_s_at | CLCC1    | chloride channel CLIC-like 1                                                                      | 1.32  | 0.018439 |
| 201735_s_at | CLCN3    | chloride channel, voltage-sensitive 3                                                             | 1.6   | 0.001756 |
| 221724_s_at | CLEC4A   | C-type lectin domain family 4, member A                                                           | -1.17 | 0.036436 |
| 207995_s_at | CLEC4M   | C-type lectin domain family 4, member M                                                           | -1.11 | 0.012449 |
| 201975_at   | CLIP1    | CAP-GLY domain containing linker protein 1                                                        | 1.19  | 0.018697 |
| 214683_s_at | CLK1     | CDC-like kinase 1                                                                                 | 1.56  | 0.029229 |
| 203291_at   | CNOT4    | CCR4-NOT transcription complex, subunit 4                                                         | 1.5   | 0.028046 |
| 219302_s_at | CNTNAP2  | contactin associated protein-like 2                                                               | -1.13 | 0.032222 |
| 219625_s_at | COL4A3BP | collagen, type IV, alpha 3 (Goodpasture antigen)                                                  | 1.33  | 0.007125 |

|             |          |                                                                        |       |          |
|-------------|----------|------------------------------------------------------------------------|-------|----------|
|             |          | binding protein                                                        |       |          |
| 206441_s_at | COMMD4   | COMM domain containing 4                                               | -1.54 | 0.033704 |
| 213379_at   | COQ2     | coenzyme Q2 homolog, prenyltransferase (yeast)                         | -1.4  | 0.014885 |
| 201754_at   | COX6C    | cytochrome c oxidase subunit VIc                                       | 1.15  | 0.044395 |
| 201256_at   | COX7A2L  | cytochrome c oxidase subunit VIIa polypeptide 2 like                   | 1.22  | 0.001014 |
| 213846_at   | COX7C    | cytochrome c oxidase subunit VIIc                                      | 1.32  | 0.030911 |
| 201943_s_at | CPD      | carboxypeptidase D                                                     | 1.43  | 0.015295 |
| 202119_s_at | CPNE3    | copine III                                                             | 1.26  | 0.005956 |
| 220479_at   | CPS1-IT1 | CPS1 intronic transcript 1 (non-protein coding)                        | -1.08 | 0.015974 |
| 220620_at   | CRCT1    | cysteine-rich C-terminal 1                                             | -1.08 | 0.041424 |
| 211897_s_at | CRHR1    | corticotropin releasing hormone receptor 1                             | 1.1   | 0.015914 |
| 202224_at   | CRK      | v-crk sarcoma virus CT10 oncogene homolog (avian)                      | 1.2   | 0.044508 |
| 203807_x_at | CSH2     | chorionic somatomammotropin hormone 2                                  | -1.17 | 0.043894 |
| 207951_at   | CSN2     | casein beta                                                            | -1.12 | 0.019776 |
| 203575_at   | CSNK2A2  | casein kinase 2, alpha prime polypeptide                               | 1.26  | 0.031838 |
| 212901_s_at | CSTF2T   | cleavage stimulation factor, 3' pre-RNA, subunit 2, 64kDa, tau variant | -1.37 | 0.002585 |
| 211674_x_at | CTAG1A*  | cancer/testis antigen 1A*                                              | -1.1  | 0.032222 |
| 200764_s_at | CTNNA1   | catenin (cadherin-associated protein), alpha 1, 102kDa                 | 1.72  | 0.006179 |
| 202087_s_at | CTSL1    | cathepsin L1                                                           | 2.77  | 0.002173 |
| 210074_at   | CTSL2    | cathepsin L2                                                           | 1.2   | 0.029021 |
| 214450_at   | CTSW     | cathepsin W                                                            | -2.16 | 0.033548 |
| 211122_s_at | CXCL11   | chemokine (C-X-C motif) ligand 11                                      | -1.07 | 0.046307 |
| 205242_at   | CXCL13   | chemokine (C-X-C motif) ligand 13                                      | -3.5  | 0.032887 |
| 217028_at   | CXCR4    | chemokine (C-X-C motif) receptor 4                                     | 1.22  | 0.037437 |
| 212977_at   | CXCR7    | chemokine (C-X-C motif) receptor 7                                     | -1.13 | 0.049775 |
| 214112_s_at | CXorf40A | chromosome X open reading frame 40A*                                   | 1.18  | 0.033407 |
| 207986_x_at | CYB561   | cytochrome b-561                                                       | -1.1  | 0.027053 |
| 202263_at   | CYB5R1   | cytochrome b5 reductase 1                                              | 1.67  | 0.001224 |
| 221903_s_at | CYLD     | cyldromatosis (turban tumor syndrome)                                  | 1.24  | 0.030108 |
| 205502_at   | CYP17A1  | cytochrome P450, family 17, subfamily A, polypeptide 1                 | -1.07 | 0.047912 |
| 205749_at   | CYP1A1   | cytochrome P450, family 1, subfamily A, polypeptide 1                  | 9.16  | 0.000028 |
| 202437_s_at | CYP1B1   | cytochrome P450, family 1, subfamily B, polypeptide 1                  | 5.43  | 0.000136 |
| 208147_s_at | CYP2C8   | cytochrome P450, family 2, subfamily C, polypeptide 8                  | 1.08  | 0.032944 |
| 214421_x_at | CYP2C9   | cytochrome P450, family 2, subfamily C, polypeptide 9                  | -1.11 | 0.041104 |
| 205999_x_at | CYP3A4   | cytochrome P450, family 3, subfamily A, polypeptide 4                  | -1.09 | 0.039162 |
| 211231_x_at | CYP4A11  | cytochrome P450, family 4, subfamily A, polypeptide 11                 | -1.1  | 0.049923 |
| 206515_at   | CYP4F3   | cytochrome P450, family 4, subfamily F, polypeptide 3                  | -1.09 | 0.029283 |



|             |         |                                                                  |       |          |
|-------------|---------|------------------------------------------------------------------|-------|----------|
| 216060_s_at | DAAM1   | dishevelled associated activator of morphogenesis 1              | 1.23  | 0.016627 |
| 217025_s_at | DBN1    | drebrin 1                                                        | -1.44 | 0.027714 |
| 218094_s_at | DBNDD2  | dysbindin (dystrobrevin binding protein 1) domain containing 2*  | -1.41 | 0.032348 |
| 209383_at   | DDIT3   | DNA-damage-inducible transcript 3                                | 1.16  | 0.028113 |
| 221081_s_at | DENND2D | DENN/MADD domain containing 2D                                   | -1.28 | 0.015055 |
| 205684_s_at | DENND4C | DENN/MADD domain containing 4C                                   | 1.27  | 0.034953 |
| 218333_at   | DERL2   | derlin 2                                                         | 1.33  | 0.032025 |
| 214198_s_at | DGCR2   | DiGeorge syndrome critical region gene 2                         | 1.21  | 0.002942 |
| 209549_s_at | DGUOK   | deoxyguanosine kinase                                            | 1.12  | 0.036967 |
| 204800_s_at | DHRS12  | dehydrogenase/reductase (SDR family) member 12                   | -1.14 | 0.001692 |
| 210788_s_at | DHRS7   | dehydrogenase/reductase (SDR family) member 7                    | 1.19  | 0.045127 |
| 219799_s_at | DHRS9   | dehydrogenase/reductase (SDR family) member 9                    | -1.16 | 0.00043  |
| 219364_at   | DHX58   | DEXH (Asp-Glu-X-His) box polypeptide 58                          | -1.3  | 0.005933 |
| 218325_s_at | DIDO1   | death inducer-obliterator 1                                      | 1.13  | 0.021872 |
| 203700_s_at | DIO2    | deiodinase, iodothyronine, type II                               | -1.1  | 0.005979 |
| 206090_s_at | DISC1   | disrupted in schizophrenia 1*                                    | -1.3  | 0.011156 |
| 221126_at   | DKK3    | dickkopf 3 homolog (Xenopus laevis)                              | -1.03 | 0.029827 |
| 212727_at   | DLG3    | discs, large homolog 3 (Drosophila)                              | -1.18 | 0.021673 |
| 201681_s_at | DLG5    | discs, large homolog 5 (Drosophila)                              | 1.18  | 0.002849 |
| 207147_at   | DLX2    | distal-less homeobox 2                                           | 1.1   | 0.031579 |
| 208250_s_at | DMBT1   | deleted in malignant brain tumors 1                              | -1.1  | 0.034003 |
| 203791_at   | DMXL1   | Dmx-like 1                                                       | 1.38  | 0.041102 |
| 210345_s_at | DNAH9   | dynein, axonemal, heavy chain 9                                  | -1.21 | 0.044411 |
| 200666_s_at | DNAJB1  | DnaJ (Hsp40) homolog, subfamily B, member 1                      | 1.32  | 0.028063 |
| 202500_at   | DNAJB2  | DnaJ (Hsp40) homolog, subfamily B, member 2                      | 1.56  | 0.028734 |
| 209015_s_at | DNAJB6  | DnaJ (Hsp40) homolog, subfamily B, member 6                      | 1.73  | 0.011758 |
| 202842_s_at | DNAJB9  | DnaJ (Hsp40) homolog, subfamily B, member 9                      | 1.61  | 0.013024 |
| 218409_s_at | DNAJC1  | DnaJ (Hsp40) homolog, subfamily C, member 1                      | 1.34  | 0.007241 |
| 212911_at   | DNAJC16 | DnaJ (Hsp40) homolog, subfamily C, member 16                     | 1.14  | 0.018121 |
| 218457_s_at | DNMT3A  | DNA (cytosine-5-)-methyltransferase 3 alpha                      | -1.17 | 0.013637 |
| 205744_at   | DOC2A   | double C2-like domains, alpha                                    | -1.11 | 0.044072 |
| 213482_at   | DOCK3   | dedicator of cytokinesis 3                                       | -1.21 | 0.003262 |
| 216835_s_at | DOK1    | docking protein 1, 62kDa (downstream of tyrosine kinase 1)       | 1.3   | 0.019634 |
| 220320_at   | DOK3    | docking protein 3                                                | -1.12 | 0.016716 |
| 202116_at   | DPF2    | D4, zinc and double PHD fingers family 2                         | 1.25  | 0.004268 |
| 211624_s_at | DRD2    | dopamine receptor D2                                             | -1.15 | 0.048872 |
| 219000_s_at | DSCC1   | defective in sister chromatid cohesion 1 homolog (S. cerevisiae) | -1.34 | 0.006289 |
| 211325_x_at | DSTNP2  | destrin (actin depolymerizing factor) pseudogene 2               | 1.25  | 0.033815 |
| 210736_x_at | DTNA    | dystrobrevin, alpha                                              | -1.15 | 0.007362 |
| 201536_at   | DUSP3   | dual specificity phosphatase 3                                   | 1.29  | 0.039223 |
| 204015_s_at | DUSP4   | dual specificity phosphatase 4                                   | 1.26  | 0.033412 |

|             |          |                                                                                            |       |          |
|-------------|----------|--------------------------------------------------------------------------------------------|-------|----------|
| 208955_at   | DUT      | deoxyuridine triphosphatase                                                                | -1.87 | 0.005332 |
| 211928_at   | DYNC1H1  | dynein, cytoplasmic 1, heavy chain 1                                                       | 1.36  | 0.047912 |
| 203590_at   | DYNC1LI2 | dynein, cytoplasmic 1, light intermediate chain 2                                          | 1.31  | 0.002882 |
| 202968_s_at | DYRK2    | dual-specificity tyrosine-(Y)-phosphorylation regulated kinase 2                           | 1.19  | 0.013932 |
| 221586_s_at | E2F5     | E2F transcription factor 5, p130-binding                                                   | -1.22 | 0.048429 |
| 203957_at   | E2F6     | E2F transcription factor 6                                                                 | 1.26  | 0.01321  |
| 219990_at   | E2F8     | E2F transcription factor 8                                                                 | -1.35 | 0.023499 |
| 202623_at   | EAPP     | E2F-associated phosphoprotein                                                              | 1.31  | 0.026252 |
| 211129_x_at | EDA      | ectodysplasin A                                                                            | 1.11  | 0.046925 |
| 219833_s_at | EFHC1    | EF-hand domain (C-terminal) containing 1                                                   | 1.24  | 0.001396 |
| 202669_s_at | EFNB2    | ephrin-B2                                                                                  | 1.2   | 0.023058 |
| 219454_at   | EGFL6    | EGF-like-domain, multiple 6                                                                | -1.15 | 0.014818 |
| 219232_s_at | EGLN3    | egl nine homolog 3 (C. elegans)                                                            | -1.11 | 0.035468 |
| 208669_s_at | EID1     | EP300 interacting inhibitor of differentiation 1                                           | -1.43 | 0.006385 |
| 211956_s_at | EIF1     | eukaryotic translation initiation factor 1                                                 | 1.22  | 0.003978 |
| 201738_at   | EIF1B    | eukaryotic translation initiation factor 1B                                                | 1.27  | 0.029695 |
| 217736_s_at | EIF2AK1  | eukaryotic translation initiation factor 2-alpha kinase 1                                  | 1.26  | 0.021086 |
| 213294_at   | EIF2AK2  | eukaryotic translation initiation factor 2-alpha kinase 2                                  | -1.49 | 0.030812 |
| 219426_at   | EIF2C3   | eukaryotic translation initiation factor 2C, 3                                             | 1.53  | 0.002833 |
| 208725_at   | EIF2S2   | eukaryotic translation initiation factor 2, subunit 2 beta, 38kDa                          | -1.28 | 0.026161 |
| 208708_x_at | EIF5     | eukaryotic translation initiation factor 5                                                 | 1.37  | 0.040484 |
| 201025_at   | EIF5B    | eukaryotic translation initiation factor 5B                                                | -1.24 | 0.044412 |
| 210827_s_at | ELF3     | E74-like factor 3 (ets domain transcription factor, epithelial-specific )                  | -1.15 | 0.039878 |
| 220366_at   | ELSPBP1  | epididymal sperm binding protein 1                                                         | -1.06 | 0.020971 |
| 217882_at   | EMC3     | ER membrane protein complex subunit 3                                                      | 1.39  | 0.004952 |
| 217898_at   | EMC7     | ER membrane protein complex subunit 7                                                      | 1.21  | 0.010205 |
| 204975_at   | EMP2     | epithelial membrane protein 2                                                              | -1.1  | 0.015631 |
| 219501_at   | ENOX1    | ecto-NOX disulfide-thiol exchanger 1                                                       | -1.18 | 0.02679  |
| 217245_at   | EPAG     | early lymphoid activation protein                                                          | -1.05 | 0.019958 |
| 202017_at   | EPHX1    | epoxide hydrolase 1, microsomal (xenobiotic)                                               | 1.39  | 0.042781 |
| 37986_at    | EPOR     | erythropoietin receptor                                                                    | 1.24  | 0.016896 |
| 217887_s_at | EPS15    | epidermal growth factor receptor pathway substrate 15                                      | 1.28  | 0.006062 |
| 207347_at   | ERCC6    | excision repair cross-complementing rodent repair deficiency, complementation group 6      | 1.79  | 0.000323 |
| 219650_at   | ERCC6L   | excision repair cross-complementing rodent repair deficiency, complementation group 6-like | -1.28 | 0.021094 |
| 205767_at   | EREG     | epiregulin                                                                                 | 1.49  | 0.009974 |
| 208959_s_at | ERP44    | endoplasmic reticulum protein 44                                                           | 1.18  | 0.006959 |
| 215552_s_at | ESR1     | estrogen receptor 1                                                                        | -1.1  | 0.04457  |
| 203349_s_at | ETV5     | ets variant 5                                                                              | 1.15  | 0.037842 |

|             |          |                                                                        |       |          |
|-------------|----------|------------------------------------------------------------------------|-------|----------|
| 204503_at   | EVPL     | envoplakin                                                             | -1.03 | 0.037143 |
| 218481_at   | EXOSC5   | exosome component 5                                                    | -1.6  | 0.041923 |
| 203249_at   | EZH1     | enhancer of zeste homolog 1 (Drosophila)                               | 1.31  | 0.03946  |
| 218080_x_at | FAF1     | Fas (TNFRSF6) associated factor 1                                      | 1.07  | 0.02591  |
| 212108_at   | FAF2     | Fas associated factor family member 2                                  | 1.2   | 0.01633  |
| 221984_s_at | FAM134A  | family with sequence similarity 134, member A                          | 1.24  | 0.033474 |
| 212697_at   | FAM134C  | family with sequence similarity 134, member C                          | 1.75  | 0.000706 |
| 214889_at   | FAM149A  | family with sequence similarity 149, member A                          | -1.15 | 0.00139  |
| 221533_at   | FAM162A  | family with sequence similarity 162, member A                          | -1.11 | 0.023933 |
| 213997_at   | FAM189A1 | family with sequence similarity 189, member A1                         | -1.08 | 0.01443  |
| 214946_x_at | FAM21A   | family with sequence similarity 21, member A*                          | 1.33  | 0.004183 |
| 205775_at   | FAM50B   | family with sequence similarity 50, member B                           | 1.16  | 0.003888 |
| 218023_s_at | FAM53C   | family with sequence similarity 53, member C                           | 1.25  | 0.020839 |
| 220147_s_at | FAM60A   | family with sequence similarity 60, member A                           | -1.15 | 0.041568 |
| 222013_x_at | FAM86A   | family with sequence similarity 86, member A                           | -1.16 | 0.034769 |
| 203678_at   | FAN1     | FANCD2/FANCI-associated nuclease 1                                     | 1.21  | 0.041813 |
| 213008_at   | FANCI    | Fanconi anemia, complementation group I                                | -1.49 | 0.001657 |
| 220615_s_at | FAR2     | fatty acyl CoA reductase 2                                             | -1.77 | 0.000395 |
| 202159_at   | FARSA    | phenylalanyl-tRNA synthetase, alpha subunit                            | -1.36 | 0.02278  |
| 202271_at   | FBXO28   | F-box protein 28                                                       | 1.22  | 0.039524 |
| 221945_at   | FBXO41   | F-box protein 41                                                       | -1.07 | 0.039647 |
| 221813_at   | FBXO42   | F-box protein 42                                                       | 1.12  | 0.024476 |
| 216950_s_at | FCGR1A   | Fc fragment of IgG, high affinity Ia, receptor (CD64)*                 | -1.4  | 0.004739 |
| 214511_x_at | FCGR1B   | Fc fragment of IgG, high affinity Ib, receptor (CD64)                  | -1.2  | 0.0236   |
| 204007_at   | FCGR3B   | Fc fragment of IgG, low affinity IIIb, receptor (CD16b)                | -1.1  | 0.008208 |
| 201275_at   | FDPS     | farnesyl diphosphate synthase                                          | -1.25 | 0.018974 |
| 212373_at   | FEM1B    | fem-1 homolog b (C. elegans)                                           | 1.12  | 0.023144 |
| 204768_s_at | FEN1     | flap structure-specific endonuclease 1                                 | -1.96 | 0.025438 |
| 203656_at   | FIG4     | FIG4 homolog, SAC1 lipid phosphatase domain containing (S. cerevisiae) | 1.25  | 0.041813 |
| 212169_at   | FKBP9    | FK506 binding protein 9, 63 kDa                                        | 1.11  | 0.038696 |
| 203707_at   | FLJ39639 | uncharacterized protein FLJ39639*                                      | 1.22  | 0.005403 |
| 219316_s_at | FLVCR2   | feline leukemia virus subgroup C cellular receptor family, member 2    | 1.29  | 0.011141 |
| 40665_at    | FMO3     | flavin containing monooxygenase 3                                      | 1.03  | 0.029953 |
| 215017_s_at | FNBP1L   | formin binding protein 1-like                                          | 2.03  | 0.014711 |
| 212232_at   | FNBP4    | formin binding protein 4                                               | 1.49  | 0.000471 |
| 206015_s_at | FOXJ3    | forkhead box J3                                                        | 1.17  | 0.030271 |
| 207683_at   | FOXN1    | forkhead box N1                                                        | -1.15 | 0.00943  |
| 204131_s_at | FOXO3    | forkhead box O3                                                        | 1.7   | 0.0026   |
| 205140_at   | FPGT     | fucose-1-phosphate guanylyltransferase                                 | 1.19  | 0.04582  |
| 213056_at   | FRMD4B   | FERM domain containing 4B                                              | -1.79 | 0.022362 |
| 214319_at   | FRY      | furry homolog (Drosophila)                                             | -1.18 | 0.000198 |

|             |           |                                                                                                  |       |          |
|-------------|-----------|--------------------------------------------------------------------------------------------------|-------|----------|
| 214211_at   | FTH1      | ferritin, heavy polypeptide 1                                                                    | 1.67  | 0.038099 |
| 211628_x_at | FTH1P5    | ferritin, heavy polypeptide 1 pseudogene 5                                                       | 1.47  | 0.006269 |
| 212788_x_at | FTL       | ferritin, light polypeptide                                                                      | 2.06  | 0.000717 |
| 202838_at   | FUCA1     | fucosidase, alpha-L- 1, tissue                                                                   | 1.41  | 0.001525 |
| 206109_at   | FUT1      | fucosyltransferase 1 (galactoside 2-alpha-L-fucosyltransferase, H blood group)                   | -1.13 | 0.024375 |
| 205565_s_at | FXN       | frataxin                                                                                         | -1.69 | 0.038841 |
| 205674_x_at | FXYD2     | FXYD domain containing ion transport regulator 2                                                 | -1.18 | 0.023932 |
| 210105_s_at | FYN       | FYN oncogene related to SRC, FGR, YES                                                            | 1.39  | 0.038446 |
| 211458_s_at | GABARAPL1 | GABA(A) receptor-associated protein like 1*                                                      | 2.89  | 0.001721 |
| 206456_at   | GABRA5    | gamma-aminobutyric acid (GABA) A receptor, alpha 5                                               | -1.05 | 0.012844 |
| 216651_s_at | GAD2      | glutamate decarboxylase 2 (pancreatic islets and brain, 65kDa)                                   | -1.13 | 0.02555  |
| 207466_at   | GAL       | galanin prepropeptide                                                                            | -1.15 | 0.003239 |
| 219271_at   | GALNT14   | UDP-N-acetyl-alpha-D-galactosamine:polypeptide N-acetylgalactosaminyltransferase 14 (GalNAc-T14) | -1.24 | 0.001225 |
| 217787_s_at | GALNT2    | UDP-N-acetyl-alpha-D-galactosamine:polypeptide N-acetylgalactosaminyltransferase 2 (GalNAc-T2)   | 1.3   | 0.029329 |
| 218912_at   | GCC1      | GRIP and coiled-coil domain containing 1                                                         | 1.25  | 0.00102  |
| 204224_s_at | GCH1      | GTP cyclohydrolase 1                                                                             | -1.21 | 0.020263 |
| 202923_s_at | GCLC      | glutamate-cysteine ligase, catalytic subunit                                                     | 1.46  | 0.017908 |
| 203925_at   | GCLM      | glutamate-cysteine ligase, modifier subunit                                                      | 1.48  | 0.031641 |
| 213129_s_at | GCSH      | glycine cleavage system protein H (aminomethyl carrier)                                          | -1.51 | 0.043881 |
| 220903_at   | GFM1      | G elongation factor, mitochondrial 1                                                             | -1.11 | 0.017912 |
| 213772_s_at | GGA2      | golgi-associated, gamma adaptin ear containing, ARF binding protein 2                            | 1.28  | 0.003494 |
| 205582_s_at | GGT5      | gamma-glutamyltransferase 5                                                                      | -1.19 | 0.017385 |
| 214430_at   | GLA       | galactosidase, alpha                                                                             | 1.62  | 0.000282 |
| 203158_s_at | GLS       | glutaminase                                                                                      | 2.24  | 0.000184 |
| 218147_s_at | GLT8D1    | glycosyltransferase 8 domain containing 1                                                        | 1.35  | 0.002252 |
| 212737_at   | GM2A      | GM2 ganglioside activator                                                                        | 1.42  | 0.027955 |
| 214106_s_at | GMDS      | GDP-mannose 4,6-dehydratase                                                                      | -1.33 | 0.010716 |
| 220938_s_at | GMEB1     | glucocorticoid modulatory element binding protein 1                                              | -1.22 | 0.027642 |
| 212294_at   | GNG12     | guanine nucleotide binding protein (G protein), gamma 12                                         | 1.13  | 0.014122 |
| 211522_s_at | GNRHR     | gonadotropin-releasing hormone receptor                                                          | -1.08 | 0.011951 |
| 204384_at   | GOLGA2    | golgin A2                                                                                        | 1.31  | 0.035988 |
| 201057_s_at | GOLGB1    | golgin B1                                                                                        | 1.52  | 0.002311 |
| 218361_at   | GOLPH3L   | golgi phosphoprotein 3-like                                                                      | 1.27  | 0.008261 |
| 218873_at   | GON4L     | gon-4-like (C. elegans)                                                                          | 1.15  | 0.046341 |
| 219818_s_at | GPATCH1   | G patch domain containing 1                                                                      | 1.42  | 0.008014 |
| 219078_at   | GPATCH2   | G patch domain containing 2                                                                      | 1.3   | 0.013762 |
| 217877_s_at | GPBP1L1   | GC-rich promoter binding protein 1-like 1                                                        | 1.14  | 0.028703 |
| 201141_at   | GPNMB     | glycoprotein (transmembrane) nmb                                                                 | 1.27  | 0.009211 |

|             |           |                                                                              |       |          |
|-------------|-----------|------------------------------------------------------------------------------|-------|----------|
| 211979_at   | GPR107    | G protein-coupled receptor 107                                               | 1.18  | 0.002341 |
| 221149_at   | GPR77     | G protein-coupled receptor 77                                                | -1.19 | 0.016501 |
| 220313_at   | GPR88     | G protein-coupled receptor 88                                                | 1.08  | 0.016707 |
| 219388_at   | GRHL2     | grainyhead-like 2 (Drosophila)                                               | -1.08 | 0.039128 |
| 208464_at   | GRIA4     | glutamate receptor, ionotropic, AMPA 4                                       | -1.17 | 0.037845 |
| 205915_x_at | GRIN1     | glutamate receptor, ionotropic, N-methyl D-aspartate 1                       | -1.1  | 0.046863 |
| 217595_at   | GSPT1     | G1 to S phase transition 1                                                   | -1.15 | 0.005904 |
| 205770_at   | GSR       | glutathione reductase                                                        | 1.48  | 0.012413 |
| 215091_s_at | GTF3A     | general transcription factor IIIA                                            | -1.28 | 0.004296 |
| 205488_at   | GZMA      | granzyme A (granzyme 1, cytotoxic T-lymphocyte-associated serine esterase 3) | -2.43 | 0.046934 |
| 214501_s_at | H2AFY     | H2A histone family, member Y                                                 | -1.22 | 0.02438  |
| 206643_at   | HAL       | histidine ammonia-lyase                                                      | -1.08 | 0.022825 |
| 220138_at   | HAND1     | heart and neural crest derivatives expressed 1                               | -1.08 | 0.035365 |
| 209252_at   | HARS2     | histidyl-tRNA synthetase 2, mitochondrial (putative)                         | 1.27  | 0.005655 |
| 216063_at   | HBBP1     | hemoglobin, beta pseudogene 1                                                | -1.15 | 0.024138 |
| 209102_s_at | HBP1      | HMG-box transcription factor 1                                               | 2.03  | 0.019516 |
| 216174_at   | HCRP1     | hepatocellular carcinoma-related HCRP1                                       | -1.36 | 0.010087 |
| 201209_at   | HDAC1     | histone deacetylase 1                                                        | -1.21 | 0.037194 |
| 46167_at    | HEATR8    | HEAT repeat containing 8*                                                    | 1.38  | 0.022758 |
| 218450_at   | HEBP1     | heme binding protein 1                                                       | 1.31  | 0.027811 |
| 218603_at   | HECA      | headcase homolog (Drosophila)                                                | 1.35  | 0.000422 |
| 218632_at   | HECTD3    | HECT domain containing E3 ubiquitin protein ligase 3                         | 1.26  | 0.04519  |
| 220085_at   | HELLS     | helicase, lymphoid-specific                                                  | -1.34 | 0.013632 |
| 206183_s_at | HERC3     | HECT and RLD domain containing E3 ubiquitin protein ligase 3                 | -1.14 | 0.010173 |
| 211267_at   | HESX1     | HESX homeobox 1                                                              | -1.12 | 0.013238 |
| 201944_at   | HEXB      | hexosaminidase B (beta polypeptide)                                          | 1.23  | 0.004019 |
| 202814_s_at | HEXIM1    | hexamethylene bis-acetamide inducible 1                                      | 1.21  | 0.019197 |
| 59999_at    | HIF1AN    | hypoxia inducible factor 1, alpha subunit inhibitor                          | 1.25  | 0.005915 |
| 200093_s_at | HINT1     | histidine triad nucleotide binding protein 1                                 | 1.17  | 0.017542 |
| 205426_s_at | HIP1      | huntingtin interacting protein 1                                             | 1.07  | 0.014075 |
| 209398_at   | HIST1H1C  | histone cluster 1, H1c                                                       | 1.37  | 0.023672 |
| 215071_s_at | HIST1H2AC | histone cluster 1, H2ac                                                      | 1.4   | 0.026175 |
| 209911_x_at | HIST1H2BD | histone cluster 1, H2bd                                                      | 1.35  | 0.002836 |
| 209806_at   | HIST1H2BK | histone cluster 1, H2bk                                                      | 1.54  | 0.004939 |
| 212641_at   | HIVEP2    | human immunodeficiency virus type I enhancer binding protein 2               | 1.35  | 0.009066 |
| 204754_at   | HLF       | hepatic leukemia factor                                                      | -1.12 | 0.017527 |
| 203665_at   | HMOX1     | heme oxygenase (decycling) 1                                                 | 3.48  | 0.00347  |
| 216031_x_at | HN1L      | hematological and neurological expressed 1-like                              | -1.17 | 0.026429 |
| 205313_at   | HNF1B     | HNF1 homeobox B                                                              | -1.18 | 0.043189 |
| 211933_s_at | HNRNPA3   | heterogeneous nuclear ribonucleoprotein A3*                                  | -1.28 | 0.010792 |

|             |          |                                                                                           |       |          |
|-------------|----------|-------------------------------------------------------------------------------------------|-------|----------|
| 209330_s_at | HNRNPD   | heterogeneous nuclear ribonucleoprotein D (AU-rich element RNA binding protein 1, 37kDa)  | -1.39 | 0.016126 |
| 209068_at   | HNRPDL   | heterogeneous nuclear ribonucleoprotein D-like                                            | -1.23 | 0.009142 |
| 206194_at   | HOXC4    | homeobox C4                                                                               | -1.11 | 0.019753 |
| 206739_at   | HOXC5    | homeobox C5                                                                               | -1.19 | 0.006423 |
| 203913_s_at | HPGD     | hydroxyprostaglandin dehydrogenase 15-(NAD)                                               | -1.23 | 0.039397 |
| 204934_s_at | HPN      | hepsin                                                                                    | -1.12 | 0.017462 |
| 202854_at   | HPRT1    | hypoxanthine phosphoribosyltransferase 1                                                  | -1.2  | 0.005226 |
| 219984_s_at | HRASLS   | HRAS-like suppressor                                                                      | -1.04 | 0.032043 |
| 205404_at   | HSD11B1  | hydroxysteroid (11-beta) dehydrogenase 1                                                  | -1.47 | 0.000017 |
| 217989_at   | HSD17B11 | hydroxysteroid (17-beta) dehydrogenase 11                                                 | 1.56  | 0.026463 |
| 204818_at   | HSD17B2  | hydroxysteroid (17-beta) dehydrogenase 2                                                  | -1.09 | 0.041967 |
| 214434_at   | HSPA12A  | heat shock 70kDa protein 12A                                                              | -1.17 | 0.03153  |
| 200800_s_at | HSPA1A*  | heat shock 70kDa protein 1A*                                                              | 1.86  | 0.033259 |
| 209448_at   | HTATIP2  | HIV-1 Tat interactive protein 2, 30kDa                                                    | 1.37  | 0.012754 |
| 207135_at   | HTR2A    | 5-hydroxytryptamine (serotonin) receptor 2A, G protein-coupled                            | 1.08  | 0.049918 |
| 207577_at   | HTR4     | 5-hydroxytryptamine (serotonin) receptor 4, G protein-coupled                             | -1.12 | 0.019151 |
| 207783_x_at | HUWE1    | HECT, UBA and WWE domain containing 1, E3 ubiquitin protein ligase                        | 1.05  | 0.039046 |
| 201193_at   | IDH1     | isocitrate dehydrogenase 1 (NADP+), soluble                                               | 1.37  | 0.010334 |
| 202439_s_at | IDS      | iduronate 2-sulfatase                                                                     | 1.89  | 0.000865 |
| 218611_at   | IER5     | immediate early response 5                                                                | 1.67  | 0.004057 |
| 214022_s_at | IFITM1   | interferon induced transmembrane protein 1                                                | -1.55 | 0.012531 |
| 208548_at   | IFNA6    | interferon, alpha 6                                                                       | 1.09  | 0.03492  |
| 210312_s_at | IFT20    | intraflagellar transport 20 homolog (Chlamydomonas)                                       | 1.3   | 0.006419 |
| 204703_at   | IFT88    | intraflagellar transport 88 homolog (Chlamydomonas)                                       | 1.22  | 0.001454 |
| 209540_at   | IGF1     | insulin-like growth factor 1 (somatomedin C)                                              | -1.11 | 0.032409 |
| 202409_at   | IGF2     | insulin-like growth factor 2 (somatomedin A)*                                             | -1.23 | 0.027309 |
| 201162_at   | IGFBP7   | insulin-like growth factor binding protein 7                                              | -1.09 | 0.039342 |
| 217198_x_at | IGH      | immunoglobulin heavy locus*                                                               | -1.14 | 0.024559 |
| 212592_at   | IGJ      | immunoglobulin J polypeptide, linker protein for immunoglobulin alpha and mu polypeptides | -1.15 | 0.018981 |
| 211881_x_at | IGLJ3    | immunoglobulin lambda joining 3                                                           | -1.24 | 0.02332  |
| 217227_x_at | IGLV1-44 | immunoglobulin lambda variable 1-44                                                       | 1.13  | 0.007344 |
| 204549_at   | IKBKE    | inhibitor of kappa light polypeptide gene enhancer in B-cells, kinase epsilon             | -1.15 | 0.003287 |
| 209929_s_at | IKBKG    | inhibitor of kappa light polypeptide gene enhancer in B-cells, kinase gamma               | 1.21  | 0.044673 |
| 209575_at   | IL10RB   | interleukin 10 receptor, beta                                                             | 1.32  | 0.033428 |
| 206618_at   | IL18R1   | interleukin 18 receptor 1                                                                 | -1.26 | 0.017261 |
| 207072_at   | IL18RAP  | interleukin 18 receptor accessory protein                                                 | -1.5  | 0.03396  |
| 221271_at   | IL21     | interleukin 21                                                                            | -2.8  | 0.004524 |
| 221165_s_at | IL22     | interleukin 22                                                                            | -1.22 | 0.034491 |
| 217326_x_at | IL23A    | Interleukin 23, alpha subunit p19*                                                        | -1.17 | 0.022837 |

|             |          |                                                                                  |       |          |
|-------------|----------|----------------------------------------------------------------------------------|-------|----------|
| 221111_at   | IL26     | interleukin 26                                                                   | -1.28 | 0.044212 |
| 207902_at   | IL5RA    | interleukin 5 receptor, alpha                                                    | -1.13 | 0.002636 |
| 205945_at   | IL6R     | interleukin 6 receptor                                                           | 1.15  | 0.029984 |
| 221688_s_at | IMP3     | IMP3, U3 small nucleolar ribonucleoprotein, homolog (yeast)                      | -1.61 | 0.045491 |
| 204552_at   | INPP4A   | inositol polyphosphate-4-phosphatase, type I, 107kDa                             | 1.15  | 0.04934  |
| 203607_at   | INPP5F   | inositol polyphosphate-5-phosphatase F                                           | 1.78  | 0.04747  |
| 201625_s_at | INSIG1   | insulin induced gene 1                                                           | 1.38  | 0.011898 |
| 213792_s_at | INSR     | insulin receptor                                                                 | 1.43  | 0.02112  |
| 218616_at   | INTS12   | integrator complex subunit 12                                                    | 1.33  | 0.037574 |
| 210114_at   | INVS     | inversin                                                                         | 1.38  | 0.032102 |
| 211953_s_at | IPO5     | importin 5                                                                       | -1.34 | 0.02057  |
| 221974_at   | IPW      | imprinted in Prader-Willi syndrome (non-protein coding)*                         | 1.3   | 0.037371 |
| 217124_at   | IQCE     | IQ motif containing E                                                            | 1.07  | 0.034198 |
| 209184_s_at | IRS2     | insulin receptor substrate 2                                                     | 1.73  | 0.009374 |
| 209075_s_at | ISCU     | iron-sulfur cluster scaffold homolog (E. coli)                                   | 1.29  | 0.000252 |
| 218893_at   | ISOC2    | isochorismatase domain containing 2                                              | -1.6  | 0.029725 |
| 200851_s_at | IST1     | increased sodium tolerance 1 homolog (yeast)                                     | 1.25  | 0.015139 |
| 209744_x_at | ITCH     | itchy E3 ubiquitin protein ligase                                                | 1.39  | 0.01121  |
| 220590_at   | ITFG2    | integrin alpha FG-GAP repeat containing 2                                        | -1.09 | 0.031108 |
| 206494_s_at | ITGA2B   | integrin, alpha 2b (platelet glycoprotein IIb of IIb/IIIa complex, antigen CD41) | -1.07 | 0.023231 |
| 219829_at   | ITGB1BP2 | integrin beta 1 binding protein (melusin) 2                                      | -1.1  | 0.013535 |
| 209907_s_at | ITSN2    | intersectin 2                                                                    | 1.14  | 0.007901 |
| 212723_at   | JMJD6    | jumonji domain containing 6                                                      | 1.22  | 0.00881  |
| 217146_at   | JRK      | jerky homolog (mouse)                                                            | -1.09 | 0.008118 |
| 201464_x_at | JUN      | jun proto-oncogene                                                               | 1.75  | 0.035639 |
| 215046_at   | KANSL1L  | KAT8 regulatory NSL complex subunit 1-like                                       | 1.14  | 0.004221 |
| 206689_x_at | KAT5     | K(lysine) acetyltransferase 5                                                    | -1.2  | 0.048858 |
| 217938_s_at | KCMF1    | potassium channel modulatory factor 1                                            | 1.26  | 0.038734 |
| 210179_at   | KCNJ13   | potassium inwardly-rectifying channel, subfamily J, member 13                    | -1.07 | 0.047086 |
| 219564_at   | KCNJ16   | potassium inwardly-rectifying channel, subfamily J, member 16                    | -1.05 | 0.025626 |
| 206765_at   | KCNJ2    | potassium inwardly-rectifying channel, subfamily J, member 2                     | -1.14 | 0.006855 |
| 215736_at   | KCNV1    | potassium channel, subfamily V, member 1                                         | -1.04 | 0.015973 |
| 218553_s_at | KCTD15   | potassium channel tetramerisation domain containing 15                           | -1.1  | 0.014975 |
| 212564_at   | KCTD2    | potassium channel tetramerisation domain containing 2                            | 1.19  | 0.022741 |
| 213474_at   | KCTD7    | potassium channel tetramerisation domain containing 7*                           | 1.16  | 0.044902 |
| 212689_s_at | KDM3A    | lysine (K)-specific demethylase 3A                                               | 1.85  | 0.009199 |
| 203205_at   | KDM4A    | lysine (K)-specific demethylase 4A                                               | 1.13  | 0.00787  |
| 203934_at   | KDR      | kinase insert domain receptor (a type III receptor                               | -1.04 | 0.028162 |

|             |          |                                                       |       |          |
|-------------|----------|-------------------------------------------------------|-------|----------|
|             |          | tyrosine kinase)                                      |       |          |
| 202417_at   | KEAP1    | kelch-like ECH-associated protein 1                   | 1.29  | 0.01799  |
| 212356_at   | KHNYN    | KH and NYN domain containing                          | 1.44  | 0.021645 |
| 212735_at   | KIAA0226 | KIAA0226                                              | 1.13  | 0.04427  |
| 212441_at   | KIAA0232 | KIAA0232                                              | 1.49  | 0.014525 |
| 206017_at   | KIAA0319 | KIAA0319                                              | -1.11 | 0.042258 |
| 203288_at   | KIAA0355 | KIAA0355                                              | 1.65  | 0.000013 |
| 212427_at   | KIAA0368 | KIAA0368                                              | -1.12 | 0.039631 |
| 204546_at   | KIAA0513 | KIAA0513                                              | 1.4   | 0.000163 |
| 204711_at   | KIAA0753 | KIAA0753                                              | 1.16  | 0.00227  |
| 213316_at   | KIAA1462 | KIAA1462                                              | -1.06 | 0.048098 |
| 209680_s_at | KIFC1    | kinesin family member C1                              | -1.2  | 0.026047 |
| 213656_s_at | KLC1     | kinesin light chain 1                                 | 1.24  | 0.03066  |
| 210504_at   | KLF1     | Kruppel-like factor 1 (erythroid)                     | -1.14 | 0.011217 |
| 203543_s_at | KLF9     | Kruppel-like factor 9                                 | 1.2   | 0.026013 |
| 210111_s_at | KLHDC10  | kelch domain containing 10                            | 1.36  | 0.019973 |
| 217906_at   | KLHDC2   | kelch domain containing 2                             | 1.47  | 0.000687 |
| 203068_at   | KLHL21   | kelch-like 21 (Drosophila)                            | 1.73  | 0.008519 |
| 213610_s_at | KLHL23   | kelch-like 23 (Drosophila)*                           | -1.1  | 0.041805 |
| 221985_at   | KLHL24   | kelch-like 24 (Drosophila)                            | 2.02  | 0.004662 |
| 213233_s_at | KLHL9    | kelch-like 9 (Drosophila)                             | -1.15 | 0.028583 |
| 211138_s_at | KMO      | kynurenine 3-monooxygenase (kynurenine 3-hydroxylase) | -1.86 | 0.02903  |
| 202059_s_at | KPNA1    | karyopherin alpha 1 (importin alpha 5)                | 1.44  | 0.030239 |
| 220160_s_at | KPTN     | kaptin (actin binding protein)                        | -1.27 | 0.015422 |
| 209351_at   | KRT14    | keratin 14                                            | -1.04 | 0.044505 |
| 207065_at   | KRT75    | keratin 75                                            | -1.2  | 0.01648  |
| 204584_at   | L1CAM    | L1 cell adhesion molecule                             | 1.17  | 0.040901 |
| 206486_at   | LAG3     | lymphocyte-activation gene 3                          | -1.68 | 0.040649 |
| 213519_s_at | LAMA2    | laminin, alpha 2                                      | -1.22 | 0.004266 |
| 209270_at   | LAMB3    | laminin, beta 3                                       | -1.08 | 0.030925 |
| 203042_at   | LAMP2    | lysosomal-associated membrane protein 2               | 1.52  | 0.011151 |
| 200673_at   | LAPTM4A  | lysosomal protein transmembrane 4 alpha               | 1.52  | 0.017594 |
| 207734_at   | LAX1     | lymphocyte transmembrane adaptor 1                    | 1.36  | 0.044343 |
| 221515_s_at | LCMT1    | leucine carboxyl methyltransferase 1                  | 1.13  | 0.009699 |
| 217173_s_at | LDLR     | low density lipoprotein receptor                      | -1.14 | 0.021961 |
| 221557_s_at | LEF1     | lymphoid enhancer-binding factor 1                    | -1.1  | 0.034354 |
| 207092_at   | LEP      | leptin                                                | -1.12 | 0.033362 |
| 202595_s_at | LEPROTL1 | leptin receptor overlapping transcript-like 1         | 1.16  | 0.041125 |
| 208933_s_at | LGALS8   | lectin, galactoside-binding, soluble, 8               | 1.86  | 0.036505 |
| 203236_s_at | LGALS9   | lectin, galactoside-binding, soluble, 9               | -1.46 | 0.007718 |
| 205266_at   | LIF      | leukemia inhibitory factor                            | -2.48 | 0.003624 |
| 210582_s_at | LIMK2    | LIM domain kinase 2                                   | -1.23 | 0.048473 |



|             |                  |                                                                               |       |          |
|-------------|------------------|-------------------------------------------------------------------------------|-------|----------|
| 216935_at   | LINC00302        | long intergenic non-protein coding RNA 302                                    | 1.11  | 0.032665 |
| 220904_at   | LINC00574        | long intergenic non-protein coding RNA 574                                    | -1.1  | 0.038648 |
| 206606_at   | LIPC             | lipase, hepatic                                                               | -1.18 | 0.038592 |
| 221274_s_at | LMAN2L           | lectin, mannose-binding 2-like                                                | 1.32  | 0.002623 |
| 218191_s_at | LMBRD1           | LMBR1 domain containing 1                                                     | 1.25  | 0.002908 |
| 211562_s_at | LMOD1            | leiomodoin 1 (smooth muscle)                                                  | -1.04 | 0.031799 |
| 221847_at   | LOC10012936<br>1 | chromosome X open reading frame 69 pseudogene                                 | 1.22  | 0.025703 |
| 213893_x_at | LOC10013283<br>2 | PMS2 postmeiotic segregation increased 2 ( <i>S. cerevisiae</i> ) pseudogene* | 1.21  | 0.01249  |
| 220514_at   | LOC10050587<br>0 | uncharacterized LOC100505870                                                  | -1.15 | 0.007377 |
| 213685_at   | LOC10050696<br>3 | uncharacterized LOC100506963                                                  | 1.29  | 0.009445 |
| 211262_at   | LOC10050747<br>2 | uncharacterized LOC100507472*                                                 | -1.13 | 0.026129 |
| 215644_at   | LOC10050947<br>4 | uncharacterized LOC100509474*                                                 | -1.07 | 0.006392 |
| 214657_s_at | LOC10065301<br>7 | uncharacterized LOC100653017*                                                 | 1.38  | 0.001333 |
| 216659_at   | LOC1720          | dihydrofolate reductase pseudogene                                            | -1.05 | 0.029823 |
| 219043_s_at | LOC285359        | phosducin-like 3 pseudogene*                                                  | -1.36 | 0.011884 |
| 214129_at   | LOC728802        | myomegalin-like*                                                              | 1.22  | 0.007927 |
| 222001_x_at | LOC728855        | uncharacterized LOC728855*                                                    | 1.4   | 0.001027 |
| 220009_at   | LONRF3           | LON peptidase N-terminal domain and ring finger 3                             | -1.17 | 0.043335 |
| 212276_at   | LPIN1            | lipin 1                                                                       | 1.2   | 0.023523 |
| 216250_s_at | LPXN             | leupaxin                                                                      | 1.44  | 0.001366 |
| 207797_s_at | LRP2BP           | LRP2 binding protein                                                          | -1.07 | 0.029983 |
| 209468_at   | LRP5             | low density lipoprotein receptor-related protein 5                            | 1.19  | 0.031544 |
| 218550_s_at | LRRC20           | leucine rich repeat containing 20                                             | -1.08 | 0.049102 |
| 218364_at   | LRRFIP2          | leucine rich repeat (in FLII) interacting protein 2                           | 1.29  | 0.001564 |
| 204559_s_at | LSM7             | LSM7 homolog, U6 small nuclear RNA associated ( <i>S. cerevisiae</i> )        | -1.28 | 0.030951 |
| 214181_x_at | LST1             | leukocyte specific transcript 1                                               | -1.81 | 0.021303 |
| 218437_s_at | LZTFL1           | leucine zipper transcription factor-like 1                                    | 1.07  | 0.048087 |
| 36711_at    | MAFF             | v-maf musculoaponeurotic fibrosarcoma oncogene homolog F (avian)              | 2.06  | 0.011732 |
| 204970_s_at | MAFG             | v-maf musculoaponeurotic fibrosarcoma oncogene homolog G (avian)              | 1.3   | 0.011651 |
| 210437_at   | MAGEA9           | melanoma antigen family A, 9*                                                 | -1.15 | 0.013205 |
| 217920_at   | MAN1A2           | mannosidase, alpha, class 1A, member 2                                        | 1.15  | 0.039905 |
| 220945_x_at | MANSC1           | MANSC domain containing 1                                                     | -1.11 | 0.025947 |
| 208786_s_at | MAP1LC3B         | microtubule-associated protein 1 light chain 3 beta                           | 1.43  | 0.003096 |
| 202568_s_at | MARK3            | MAP/microtubule affinity-regulating kinase 3                                  | 1.31  | 0.002744 |
| 212505_s_at | MAU2             | MAU2 chromatid cohesion factor homolog ( <i>C. elegans</i> )                  | 1.34  | 0.008942 |
| 203353_s_at | MBD1             | methyl-CpG binding domain protein 1                                           | 1.17  | 0.03972  |
| 218411_s_at | MBIP             | MAP3K12 binding inhibitory protein 1                                          | 1.08  | 0.020468 |

|             |          |                                                                                                 |       |          |
|-------------|----------|-------------------------------------------------------------------------------------------------|-------|----------|
| 203640_at   | MBNL2    | muscleblind-like splicing regulator 2                                                           | 1.3   | 0.032399 |
| 216531_at   | MBTPS2   | membrane-bound transcription factor peptidase, site 2*                                          | -1.11 | 0.045876 |
| 209623_at   | MCCC2    | methylcrotonoyl-CoA carboxylase 2 (beta)                                                        | -1.25 | 0.031912 |
| 201555_at   | MCM3     | minichromosome maintenance complex component 3                                                  | -1.42 | 0.048293 |
| 222036_s_at | MCM4     | minichromosome maintenance complex component 4                                                  | -1.2  | 0.043113 |
| 210983_s_at | MCM7     | minichromosome maintenance complex component 7                                                  | -2.07 | 0.019524 |
| 208434_at   | MECOM    | MDS1 and EVI1 complex locus                                                                     | -1.14 | 0.02263  |
| 213816_s_at | MET      | met proto-oncogene (hepatocyte growth factor receptor)                                          | -1.08 | 0.031122 |
| 219137_s_at | MFF      | mitochondrial fission factor                                                                    | -1.51 | 0.013441 |
| 207098_s_at | MFN1     | mitofusin 1                                                                                     | 1.44  | 0.044482 |
| 200898_s_at | MGEA5    | meningioma expressed antigen 5 (hyaluronidase)                                                  | 1.45  | 0.014082 |
| 205904_at   | MICA     | MHC class I polypeptide-related sequence A                                                      | 1.46  | 0.003502 |
| 212473_s_at | MICAL2   | microtubule associated monooxygenase, calponin and LIM domain containing 2                      | -1.47 | 0.025697 |
| 208384_s_at | MID2     | midline 2                                                                                       | 1.19  | 0.003925 |
| 214625_s_at | MINK1    | misshapen-like kinase 1                                                                         | -1.13 | 0.045497 |
| 214696_at   | MIR22    | microRNA 22*                                                                                    | 1.91  | 0.006553 |
| 212023_s_at | MKI67    | antigen identified by monoclonal antibody Ki-67                                                 | -1.42 | 0.039695 |
| 215291_at   | MKL1     | megakaryoblastic leukemia (translocation) 1                                                     | 1.13  | 0.035991 |
| 201285_at   | MKRN1    | makorin ring finger protein 1                                                                   | 1.31  | 0.010089 |
| 218071_s_at | MKRN2    | makorin ring finger protein 2                                                                   | 1.3   | 0.007422 |
| 204784_s_at | MLF1     | myeloid leukemia factor 1                                                                       | 1.41  | 0.000274 |
| 211071_s_at | MLLT11   | myeloid/lymphoid or mixed-lineage leukemia (trithorax homolog, Drosophila); translocated to, 11 | 1.3   | 0.025833 |
| 212508_at   | MOAP1    | modulator of apoptosis 1                                                                        | 1.29  | 0.03316  |
| 210193_at   | MOBP     | myelin-associated oligodendrocyte basic protein                                                 | -1.08 | 0.036016 |
| 213181_s_at | MOCS1    | molybdenum cofactor synthesis 1                                                                 | -1.21 | 0.024012 |
| 216863_s_at | MORC2    | MORC family CW-type zinc finger 2                                                               | 1.39  | 0.046833 |
| 221965_at   | MPHOSPH9 | M-phase phosphoprotein 9                                                                        | -1.33 | 0.014431 |
| 202472_at   | MPI      | mannose phosphate isomerase                                                                     | -1.1  | 0.039415 |
| 216825_s_at | MPL      | myeloproliferative leukemia virus oncogene                                                      | -1.21 | 0.009008 |
| 201874_at   | MPZL1    | myelin protein zero-like 1                                                                      | 1.34  | 0.011948 |
| 212199_at   | MRFAP1L1 | Morf4 family associated protein 1-like 1                                                        | 1.26  | 0.013169 |
| 218202_x_at | MRPL44   | mitochondrial ribosomal protein L44                                                             | 1.08  | 0.030204 |
| 210008_s_at | MRPS12   | mitochondrial ribosomal protein S12                                                             | -1.22 | 0.037287 |
| 219477_s_at | MRPS31P3 | mitochondrial ribosomal protein S31 pseudogene 3*                                               | 1.28  | 0.002335 |
| 207496_at   | MS4A2    | membrane-spanning 4-domains, subfamily A, member 2                                              | -1.13 | 0.029966 |
| 210254_at   | MS4A3    | membrane-spanning 4-domains, subfamily A, member 3 (hematopoietic cell-specific)                | -1.11 | 0.044554 |
| 209146_at   | MSMO1    | methylsterol monooxygenase 1                                                                    | 1.25  | 0.023938 |
| 208422_at   | MSR1     | macrophage scavenger receptor 1                                                                 | -1.06 | 0.046523 |
| 219281_at   | MSRA     | methionine sulfoxide reductase A                                                                | -1.23 | 0.007117 |
| 205323_s_at | MTF1     | metal-regulatory transcription factor 1                                                         | 1.2   | 0.039075 |

|             |              |                                                                                                                                         |       |          |
|-------------|--------------|-----------------------------------------------------------------------------------------------------------------------------------------|-------|----------|
| 202309_at   | MTHFD1       | methylenetetrahydrofolate dehydrogenase (NADP+ dependent) 1, methenyltetrahydrofolate cyclohydrolase, formyltetrahydrofolate synthetase | -1.33 | 0.005282 |
| 204673_at   | MUC2         | mucin 2, oligomeric mucus/gel-forming                                                                                                   | -1.12 | 0.018799 |
| 217109_at   | MUC4         | mucin 4, cell surface associated                                                                                                        | -1.11 | 0.043416 |
| 218246_at   | MUL1         | mitochondrial E3 ubiquitin protein ligase 1                                                                                             | 1.06  | 0.048562 |
| 221253_s_at | MUTED-TXNDC5 | MUTED-TXNDC5 readthrough (non-protein coding)*                                                                                          | -1.29 | 0.007421 |
| 202364_at   | MXI1         | MAX interactor 1                                                                                                                        | 1.82  | 0.012106 |
| 214087_s_at | MYBPC1       | myosin binding protein C, slow type                                                                                                     | -1.1  | 0.0454   |
| 216188_at   | MYCNOS       | MYCN opposite strand/antisense RNA (non-protein coding)                                                                                 | -1.14 | 0.035379 |
| 216054_x_at | MYL4         | myosin, light chain 4, alkali; atrial, embryonic                                                                                        | -1.11 | 0.033825 |
| 220288_at   | MYO15A       | myosin XVA                                                                                                                              | -1.15 | 0.00635  |
| 204527_at   | MYO5A        | myosin VA (heavy chain 12, myosin)                                                                                                      | 1.58  | 0.034316 |
| 218966_at   | MYO5C        | myosin VC                                                                                                                               | -1.38 | 0.023573 |
| 210155_at   | MYOC         | myocilin, trabecular meshwork inducible glucocorticoid response                                                                         | -1.08 | 0.011037 |
| 207148_x_at | MYOZ2        | myozenin 2                                                                                                                              | -1.19 | 0.03726  |
| 221286_s_at | MZB1         | marginal zone B and B1 cell-specific protein                                                                                            | -1.5  | 0.002497 |
| 214748_at   | N4BP2L2      | NEDD4 binding protein 2-like 2                                                                                                          | 1.12  | 0.01509  |
| 205090_s_at | NAGPA        | N-acetylglucosamine-1-phosphodiester alpha-N-acetylglucosaminidase                                                                      | 1.19  | 0.034501 |
| 201969_at   | NASP         | nuclear autoantigenic sperm protein (histone-binding)                                                                                   | -1.3  | 0.007401 |
| 216466_at   | NAV3         | neuron navigator 3                                                                                                                      | 1.13  | 0.03923  |
| 202907_s_at | NBN          | nibrin                                                                                                                                  | -1.61 | 0.001961 |
| 201384_s_at | NBR1         | neighbor of BRCA1 gene 1                                                                                                                | 1.75  | 0.046276 |
| 212789_at   | NCAPD3       | non-SMC condensin II complex, subunit D3                                                                                                | -1.19 | 0.00925  |
| 212949_at   | NCAPH        | non-SMC condensin I complex, subunit H                                                                                                  | -1.61 | 0.046345 |
| 205147_x_at | NCF4         | neutrophil cytosolic factor 4, 40kDa                                                                                                    | -1.72 | 0.002572 |
| 212867_at   | NCOA2        | nuclear receptor coactivator 2                                                                                                          | 1.37  | 0.035353 |
| 207700_s_at | NCOA3        | nuclear receptor coactivator 3                                                                                                          | 1.15  | 0.01904  |
| 211583_x_at | NCR3         | natural cytotoxicity triggering receptor 3                                                                                              | -1.69 | 0.020138 |
| 217800_s_at | NDFIP1       | Nedd4 family interacting protein 1                                                                                                      | 1.48  | 0.02027  |
| 200632_s_at | NDRG1        | N-myc downstream regulated 1                                                                                                            | 1.47  | 0.002003 |
| 202001_s_at | NDUFA6       | NADH dehydrogenase (ubiquinone) 1 alpha subcomplex, 6, 14kDa                                                                            | 1.19  | 0.044574 |
| 204125_at   | NDUFAF1      | NADH dehydrogenase (ubiquinone) complex I, assembly factor 1                                                                            | 1.32  | 0.025611 |
| 218226_s_at | NDUFB4       | NADH dehydrogenase (ubiquinone) 1 beta subcomplex, 4, 15kDa                                                                             | 1.13  | 0.006774 |
| 203961_at   | NEBL         | nebullette                                                                                                                              | -1.17 | 0.013886 |
| 204634_at   | NEK4         | NIMA (never in mitosis gene a)-related kinase 4                                                                                         | 1.52  | 0.020256 |
| 208926_at   | NEU1         | sialidase 1 (lysosomal sialidase)                                                                                                       | 1.32  | 0.033595 |
| 213438_at   | NFASC        | neurofascin                                                                                                                             | -1.09 | 0.024073 |
| 214179_s_at | NFE2L1       | nuclear factor (erythroid-derived 2)-like 1                                                                                             | 1.35  | 0.008841 |
| 218127_at   | NFYB         | nuclear transcription factor Y, beta                                                                                                    | -1.37 | 0.029846 |

|             |          |                                                                                           |       |          |
|-------------|----------|-------------------------------------------------------------------------------------------|-------|----------|
| 220742_s_at | NGLY1    | N-glycanase 1                                                                             | 1.4   | 0.038388 |
| 217722_s_at | NGRN     | neugrin, neurite outgrowth associated                                                     | 1.19  | 0.016152 |
| 218557_at   | NIT2     | nitrilase family, member 2                                                                | 1.29  | 0.03032  |
| 222105_s_at | NKIRAS2  | NFKB inhibitor interacting Ras-like 2                                                     | 1.17  | 0.045799 |
| 221567_at   | NOL3     | nucleolar protein 3 (apoptosis repressor with CARD domain)                                | 1.16  | 0.015463 |
| 202679_at   | NPC1     | Niemann-Pick disease, type C1                                                             | 1.55  | 0.000876 |
| 200701_at   | NPC2     | Niemann-Pick disease, type C2                                                             | 1.23  | 0.028599 |
| 213471_at   | NPHP4    | nephronophthisis 4                                                                        | 1.13  | 0.009584 |
| 205129_at   | NPM3     | nucleophosmin/nucleoplasm 3                                                               | -1.12 | 0.013235 |
| 221322_at   | NPVF     | neuropeptide VF precursor                                                                 | -1.16 | 0.034982 |
| 210519_s_at | NQO1     | NAD(P)H dehydrogenase, quinone 1                                                          | 3.75  | 0.000005 |
| 203814_s_at | NQO2     | NAD(P)H dehydrogenase, quinone 2                                                          | 1.57  | 0.030638 |
| 209750_at   | NR1D2    | nuclear receptor subfamily 1, group D, member 2                                           | 1.88  | 0.0064   |
| 207202_s_at | NR1I2    | nuclear receptor subfamily 1, group I, member 2                                           | -1.06 | 0.033828 |
| 204621_s_at | NR4A2    | nuclear receptor subfamily 4, group A, member 2                                           | 2.82  | 0.026147 |
| 208709_s_at | NRD1     | nardilysin (N-arginine dibasic convertase)                                                | 1.16  | 0.003995 |
| 201310_s_at | NREP     | neuronal regeneration related protein homolog (rat)                                       | -2.55 | 0.017882 |
| 220248_x_at | NSFL1C   | NSFL1 (p97) cofactor (p47)                                                                | 1.23  | 0.019776 |
| 220194_at   | NSUN7    | NOP2/Sun domain family, member 7                                                          | -1.06 | 0.022678 |
| 209731_at   | NTHL1    | nth endonuclease III-like 1 (E. coli)                                                     | -1.37 | 0.0297   |
| 208605_s_at | NTRK1    | neurotrophic tyrosine kinase, receptor, type 1                                            | -1.68 | 0.044613 |
| 215025_at   | NTRK3    | neurotrophic tyrosine kinase, receptor, type 3                                            | 1.26  | 0.0389   |
| 210575_at   | NUDC     | nuclear distribution C homolog (A. nidulans)                                              | -1.19 | 0.011969 |
| 219855_at   | NUDT11   | nudix (nucleoside diphosphate linked moiety X)-type motif 11                              | 1.23  | 0.017309 |
| 219347_at   | NUDT15   | nudix (nucleoside diphosphate linked moiety X)-type motif 15                              | -1.36 | 0.037004 |
| 208922_s_at | NXF1     | nuclear RNA export factor 1                                                               | 1.21  | 0.036884 |
| 213863_s_at | OAZ3     | ornithine decarboxylase antizyme 3                                                        | -1.18 | 0.020273 |
| 219277_s_at | OGDHL    | oxoglutarate dehydrogenase-like                                                           | -1.19 | 0.008849 |
| 202074_s_at | OPTN     | optineurin                                                                                | 1.28  | 0.001917 |
| 221465_at   | OR6A2    | olfactory receptor, family 6, subfamily A, member 2                                       | -1.14 | 0.002273 |
| 201800_s_at | OSBP     | oxysterol binding protein                                                                 | 1.12  | 0.027767 |
| 209222_s_at | OSBPL2   | oxysterol binding protein-like 2                                                          | 1.42  | 0.006248 |
| 214637_at   | OSM      | oncostatin M                                                                              | -1.9  | 0.024198 |
| 202780_at   | OXCT1    | 3-oxoacid CoA transferase 1                                                               | -1.29 | 0.019666 |
| 206880_at   | P2RX6    | purinergic receptor P2X, ligand-gated ion channel, 6                                      | -1.16 | 0.035485 |
| 218957_s_at | PAAF1    | proteasomal ATPase-associated factor 1                                                    | 1.15  | 0.042365 |
| 214204_at   | PACRG    | PARK2 co-regulated                                                                        | -1.08 | 0.040353 |
| 200815_s_at | PAFAH1B1 | platelet-activating factor acetylhydrolase 1b, regulatory subunit 1 (45kDa)               | 1.32  | 0.004043 |
| 203228_at   | PAFAH1B3 | platelet-activating factor acetylhydrolase 1b, catalytic subunit 3 (29kDa)                | -1.63 | 0.016944 |
| 201013_s_at | PAICS    | phosphoribosylaminoimidazole carboxylase, phosphoribosylaminoimidazole succinocarboxamide | -1.43 | 0.02635  |

|             |         |                                                          |       |          |
|-------------|---------|----------------------------------------------------------|-------|----------|
|             |         | synthetase                                               |       |          |
| 214620_x_at | PAM     | peptidylglycine alpha-amidating monooxygenase            | 1.12  | 0.014433 |
| 218809_at   | PANK2   | pantothenate kinase 2                                    | 1.22  | 0.012063 |
| 218433_at   | PANK3   | pantothenate kinase 3                                    | -1.13 | 0.028087 |
| 204715_at   | PANX1   | pannexin 1                                               | 1.38  | 0.035003 |
| 50400_at    | PAOX    | polyamine oxidase (exo-N4-amino)                         | -1.18 | 0.025208 |
| 208271_at   | PAPOLB  | poly(A) polymerase beta (testis specific)                | -1.08 | 0.014404 |
| 219639_x_at | PARP6   | poly (ADP-ribose) polymerase family, member 6            | 1.15  | 0.034323 |
| 209494_s_at | PATZ1   | POZ (BTB) and AT hook containing zinc finger 1           | -1.22 | 0.013132 |
| 202876_s_at | PBX2    | pre-B-cell leukemia homeobox 2                           | -1.19 | 0.013505 |
| 219656_at   | PCDH12  | protocadherin 12                                         | -1.15 | 0.035061 |
| 201202_at   | PCNA    | proliferating cell nuclear antigen                       | -1.18 | 0.034125 |
| 218676_s_at | PCTP    | phosphatidylcholine transfer protein                     | 1.23  | 0.03041  |
| 217746_s_at | PDCD6IP | programmed cell death 6 interacting protein              | 1.28  | 0.000944 |
| 211171_s_at | PDE10A  | phosphodiesterase 10A                                    | -1.08 | 0.013128 |
| 205463_s_at | PDGFA   | platelet-derived growth factor alpha polypeptide         | 1.63  | 0.016105 |
| 205226_at   | PDGFR1  | platelet-derived growth factor receptor-like             | -1.25 | 0.013992 |
| 200980_s_at | PDHA1   | pyruvate dehydrogenase (lipoamide) alpha 1               | -1.17 | 0.045466 |
| 208911_s_at | PDHB    | pyruvate dehydrogenase (lipoamide) beta                  | -1.16 | 0.027802 |
| 203857_s_at | PDIA5   | protein disulfide isomerase family A, member 5           | -1.62 | 0.003271 |
| 206348_s_at | PDK3    | pyruvate dehydrogenase kinase, isozyme 3                 | 1.17  | 0.00297  |
| 219307_at   | PDSS2   | prenyl (decaprenyl) diphosphate synthase, subunit 2      | 1.18  | 0.040792 |
| 208983_s_at | PECAM1  | platelet/endothelial cell adhesion molecule 1            | -1.74 | 0.025072 |
| 209243_s_at | PEG3    | paternally expressed 3                                   | -1.06 | 0.030209 |
| 218472_s_at | PELO    | pelota homolog (Drosophila)                              | 1.48  | 0.002173 |
| 207931_s_at | PFKFB2  | 6-phosphofructo-2-kinase/fructose-2,6-biphosphatase 2    | -1.09 | 0.032013 |
| 204047_s_at | PHACTR2 | phosphatase and actin regulator 2                        | -1.18 | 0.02691  |
| 205450_at   | PHKA1   | phosphorylase kinase, alpha 1 (muscle)                   | -1.26 | 0.003743 |
| 217996_at   | PHLDA1  | pleckstrin homology-like domain, family A, member 1      | 3.23  | 0.043173 |
| 210191_s_at | PHTF1   | putative homeodomain transcription factor 1              | 1.26  | 0.016679 |
| 209345_s_at | PI4K2A  | phosphatidylinositol 4-kinase type 2 alpha               | 1.45  | 0.00747  |
| 203035_s_at | PIAS3   | protein inhibitor of activated STAT, 3                   | 1.29  | 0.011083 |
| 212511_at   | PICALM  | phosphatidylinositol binding clathrin assembly protein   | -1.55 | 0.026973 |
| 218652_s_at | PIGG    | phosphatidylinositol glycan anchor biosynthesis, class G | 1.27  | 0.040063 |
| 209625_at   | PIGH    | phosphatidylinositol glycan anchor biosynthesis, class H | 1.21  | 0.046581 |
| 220566_at   | PIK3R5  | phosphoinositide-3-kinase, regulatory subunit 5          | -1.16 | 0.01017  |
| 209019_s_at | PINK1   | PTEN induced putative kinase 1                           | 1.71  | 0.000134 |
| 212518_at   | PIP5K1C | phosphatidylinositol-4-phosphate 5-kinase, type I, gamma | 1.18  | 0.033397 |
| 207469_s_at | PIR     | pirin (iron-binding nuclear protein)                     | 5.3   | 0.000009 |
| 214717_at   | PKI55   | DKFZp434H1419                                            | -1.21 | 0.014583 |

|             |          |                                                                               |       |          |
|-------------|----------|-------------------------------------------------------------------------------|-------|----------|
| 63305_at    | PKNOX2   | PBX/knotted 1 homeobox 2                                                      | -1.14 | 0.016085 |
| 204458_at   | PLA2G15  | phospholipase A2, group XV                                                    | 1.16  | 0.011961 |
| 219014_at   | PLAC8    | placenta-specific 8                                                           | -1.85 | 0.023144 |
| 214745_at   | PLCH1    | phospholipase C, eta 1                                                        | -1.15 | 0.033814 |
| 217044_s_at | PLEKHG3  | pleckstrin homology domain containing, family G (with RhoGef domain) member 3 | -1.25 | 0.026283 |
| 212717_at   | PLEKHM1  | pleckstrin homology domain containing, family M (with RUN domain) member 1    | 1.25  | 0.002659 |
| 218992_at   | PLGRKT   | plasminogen receptor, C-terminal lysine transmembrane protein                 | -1.1  | 0.03918  |
| 204285_s_at | PMAIP1   | phorbol-12-myristate-13-acetate-induced protein 1                             | 1.14  | 0.034594 |
| 212037_at   | PNN      | pinin, desmosome associated protein                                           | -1.3  | 0.019006 |
| 209578_s_at | POFUT2   | protein O-fucosyltransferase 2                                                | 1.31  | 0.006237 |
| 204835_at   | POLA1    | polymerase (DNA directed), alpha 1, catalytic subunit                         | -1.42 | 0.039127 |
| 219317_at   | POLI     | polymerase (DNA directed) iota                                                | 1.29  | 0.018224 |
| 214263_x_at | POLR2C   | polymerase (RNA) II (DNA directed) polypeptide C, 33kDa                       | 1.27  | 0.041088 |
| 208554_at   | POU4F3   | POU class 4 homeobox 3                                                        | 1.07  | 0.01727  |
| 217848_s_at | PPA1     | pyrophosphatase (inorganic) 1                                                 | -1.36 | 0.001598 |
| 209147_s_at | PPAP2A   | phosphatidic acid phosphatase type 2A                                         | -1.6  | 0.005325 |
| 209434_s_at | PPAT     | phosphoribosyl pyrophosphate amidotransferase                                 | -1.39 | 0.03128  |
| 203966_s_at | PPM1A    | protein phosphatase, Mg <sup>2+</sup> /Mn <sup>2+</sup> dependent, 1A         | 1.45  | 0.039591 |
| 202014_at   | PPP1R15A | protein phosphatase 1, regulatory subunit 15A                                 | 2.22  | 0.039873 |
| 205643_s_at | PPP2R2B  | protein phosphatase 2, regulatory subunit B, beta                             | -1.12 | 0.03669  |
| 202187_s_at | PPP2R5A  | protein phosphatase 2, regulatory subunit B', alpha                           | 1.15  | 0.036014 |
| 635_s_at    | PPP2R5B  | protein phosphatase 2, regulatory subunit B', beta                            | 1.15  | 0.036917 |
| 218208_at   | PQLC1    | PQ loop repeat containing 1                                                   | 1.22  | 0.033069 |
| 201494_at   | PRCP     | prolylcarboxypeptidase (angiotensinase C)                                     | 1.31  | 0.003254 |
| 203057_s_at | PRDM2    | PR domain containing 2, with ZNF domain                                       | 1.31  | 0.0495   |
| 201006_at   | PRDX2    | peroxiredoxin 2                                                               | -1.17 | 0.017884 |
| 201619_at   | PRDX3    | peroxiredoxin 3                                                               | -1.44 | 0.009139 |
| 212216_at   | PREPL    | prolyl endopeptidase-like                                                     | 1.4   | 0.009458 |
| 210543_s_at | PRKDC    | protein kinase, DNA-activated, catalytic polypeptide                          | -1.4  | 0.024807 |
| 204061_at   | PRKX     | protein kinase, X-linked                                                      | -1.4  | 0.028729 |
| 204304_s_at | PROM1    | prominin 1                                                                    | -1.05 | 0.041502 |
| 208034_s_at | PROZ     | protein Z, vitamin K-dependent plasma glycoprotein                            | -1.19 | 0.041302 |
| 202529_at   | PRPSAP1  | phosphoribosyl pyrophosphate synthetase-associated protein 1                  | 1.19  | 0.006484 |
| 219383_at   | PRR5L    | proline rich 5 like                                                           | -1.24 | 0.001497 |
| 208165_s_at | PRSS16   | protease, serine, 16 (thymus)                                                 | -1.19 | 0.039513 |
| 209586_s_at | PRUNE    | prune homolog (Drosophila)                                                    | 1.48  | 0.000061 |
| 200871_s_at | PSAP     | prosaposin                                                                    | 1.61  | 0.009313 |
| 203460_s_at | PSEN1    | presenilin 1                                                                  | 1.51  | 0.029925 |
| 210195_s_at | PSG1     | pregnancy specific beta-1-glycoprotein 1                                      | 1.06  | 0.037149 |
| 211746_x_at | PSMA1    | proteasome (prosome, macropain) subunit, alpha type, 1                        | 1.24  | 0.010285 |

|             |          |                                                                                              |       |          |
|-------------|----------|----------------------------------------------------------------------------------------------|-------|----------|
| 214288_s_at | PSMB1    | proteasome (prosome, macropain) subunit, beta type, 1                                        | 1.3   | 0.011682 |
| 200786_at   | PSMB7    | proteasome (prosome, macropain) subunit, beta type, 7                                        | 1.29  | 0.010028 |
| 209040_s_at | PSMB8    | proteasome (prosome, macropain) subunit, beta type, 8 (large multifunctional peptidase 7)    | -1.96 | 0.01525  |
| 204279_at   | PSMB9    | proteasome (prosome, macropain) subunit, beta type, 9 (large multifunctional peptidase 2)    | -1.48 | 0.032148 |
| 201199_s_at | PSMD1    | proteasome (prosome, macropain) 26S subunit, non-ATPase, 1                                   | 1.33  | 0.018324 |
| 212296_at   | PSMD14   | proteasome (prosome, macropain) 26S subunit, non-ATPase, 14                                  | 1.23  | 0.02257  |
| 200830_at   | PSMD2    | proteasome (prosome, macropain) 26S subunit, non-ATPase, 2                                   | 1.23  | 0.002627 |
| 200882_s_at | PSMD4    | proteasome (prosome, macropain) 26S subunit, non-ATPase, 4                                   | 1.37  | 0.002901 |
| 201705_at   | PSMD7    | proteasome (prosome, macropain) 26S subunit, non-ATPase, 7                                   | 1.24  | 0.048482 |
| 212219_at   | PSME4    | proteasome (prosome, macropain) activator subunit 4                                          | 1.21  | 0.0316   |
| 219938_s_at | PSTPIP2  | proline-serine-threonine phosphatase interacting protein 2                                   | -1.56 | 0.007365 |
| 211711_s_at | PTEN     | phosphatase and tensin homolog                                                               | 1.48  | 0.049421 |
| 210831_s_at | PTGER3   | prostaglandin E receptor 3 (subtype EP3)                                                     | -1.18 | 0.008537 |
| 208131_s_at | PTGIS    | prostaglandin I2 (prostacyclin) synthase                                                     | -1.22 | 0.035208 |
| 205911_at   | PTH1R    | parathyroid hormone 1 receptor                                                               | -1.09 | 0.027187 |
| 200773_x_at | PTMA     | prothymosin, alpha                                                                           | -1.18 | 0.010761 |
| 204201_s_at | PTPN13   | protein tyrosine phosphatase, non-receptor type 13 (APO-1/CD95 (Fas)-associated phosphatase) | -1.07 | 0.030143 |
| 213136_at   | PTPN2    | protein tyrosine phosphatase, non-receptor type 2                                            | -1.29 | 0.036309 |
| 1320_at     | PTPN21   | protein tyrosine phosphatase, non-receptor type 21                                           | -1.13 | 0.030636 |
| 211534_x_at | PTPRN2   | protein tyrosine phosphatase, receptor type, N polypeptide 2                                 | -1.09 | 0.027361 |
| 200677_at   | PTTG1IP  | pituitary tumor-transforming 1 interacting protein                                           | 1.4   | 0.005397 |
| 201164_s_at | PUM1     | pumilio homolog 1 (Drosophila)                                                               | 1.13  | 0.042606 |
| 216283_s_at | PVR      | poliovirus receptor                                                                          | -1.24 | 0.033103 |
| 219812_at   | PVRIG    | poliovirus receptor related immunoglobulin domain containing                                 | -1.73 | 0.02486  |
| 212013_at   | PXDN     | peroxidasin homolog (Drosophila)                                                             | -1.2  | 0.00937  |
| 200863_s_at | RAB11A   | RAB11A, member RAS oncogene family                                                           | 1.23  | 0.016688 |
| 219412_at   | RAB38    | RAB38, member RAS oncogene family                                                            | 1.73  | 0.004272 |
| 204547_at   | RAB40B   | RAB40B, member RAS oncogene family                                                           | 1.24  | 0.005772 |
| 210406_s_at | RAB6A    | RAB6A, member RAS oncogene family*                                                           | 1.28  | 0.03072  |
| 213313_at   | RABGAP1  | RAB GTPase activating protein 1                                                              | 1.33  | 0.002135 |
| 203020_at   | RABGAP1L | RAB GTPase activating protein 1-like                                                         | 1.2   | 0.031155 |
| 213970_at   | RABL3    | RAB, member of RAS oncogene family-like 3                                                    | -1.28 | 0.00068  |
| 219828_at   | RABL6    | RAB, member RAS oncogene family-like 6                                                       | -1.13 | 0.048655 |
| 210255_at   | RAD51B   | RAD51 homolog B (S. cerevisiae)                                                              | -1.2  | 0.006865 |
| 204558_at   | RAD54L   | RAD54-like (S. cerevisiae)                                                                   | -1.22 | 0.041756 |
| 202845_s_at | RALBP1   | ralA binding protein 1                                                                       | 1.31  | 0.032465 |

|             |           |                                                                                       |       |          |
|-------------|-----------|---------------------------------------------------------------------------------------|-------|----------|
| 202483_s_at | RANBP1    | RAN binding protein 1                                                                 | -1.94 | 0.008161 |
| 53987_at    | RANBP10   | RAN binding protein 10                                                                | 1.09  | 0.038536 |
| 202640_s_at | RANBP3    | RAN binding protein 3                                                                 | 1.09  | 0.045114 |
| 217020_at   | RARB      | retinoic acid receptor, beta                                                          | -1.11 | 0.048633 |
| 208534_s_at | RASA4     | RAS p21 protein activator 4*                                                          | -1.52 | 0.039811 |
| 203185_at   | RASSF2    | Ras association (RalGDS/AF-6) domain family member 2                                  | -1.19 | 0.049082 |
| 49306_at    | RASSF4    | Ras association (RalGDS/AF-6) domain family member 4                                  | -1.18 | 0.002331 |
| 219419_at   | RBFA      | ribosome binding factor A (putative)                                                  | -1.33 | 0.007448 |
| 220509_at   | RBM26     | RNA binding motif protein 26                                                          | -1.11 | 0.042301 |
| 221595_at   | RBM48     | RNA binding motif protein 48                                                          | 1.17  | 0.045136 |
| 213762_x_at | RBMX      | RNA binding motif protein, X-linked*                                                  | -1.2  | 0.024435 |
| 210318_at   | RBP3      | retinol binding protein 3, interstitial                                               | -1.1  | 0.038232 |
| 215253_s_at | RCAN1     | regulator of calcineurin 1                                                            | -1.08 | 0.019442 |
| 204759_at   | RCBTB2    | regulator of chromosome condensation (RCC1) and BTB (POZ) domain containing protein 2 | 2.3   | 0.007148 |
| 212397_at   | RDX       | radixin                                                                               | 1.22  | 0.009961 |
| 204364_s_at | REEP1     | receptor accessory protein 1                                                          | 1.17  | 0.017798 |
| 218777_at   | REEP4     | receptor accessory protein 4                                                          | 1.14  | 0.045673 |
| 218194_at   | REXO2     | REX2, RNA exonuclease 2 homolog ( <i>S. cerevisiae</i> )                              | 1.09  | 0.040315 |
| 208021_s_at | RFC1      | replication factor C (activator 1) 1, 145kDa                                          | 1.15  | 0.007143 |
| 214409_at   | RFPL3-AS1 | RFPL3 antisense RNA 1 (non-protein coding)                                            | 1.15  | 0.016084 |
| 202988_s_at | RGS1      | regulator of G-protein signaling 1                                                    | 1.46  | 0.016417 |
| 204319_s_at | RGS10     | regulator of G-protein signaling 10                                                   | 1.96  | 0.013928 |
| 220300_at   | RGS3      | regulator of G-protein signaling 3                                                    | 1.22  | 0.004657 |
| 204402_at   | RHBDD3    | rhomboid domain containing 3                                                          | 1.19  | 0.020143 |
| 207383_s_at | RHBDL1    | rhomboid, veinlet-like 1 ( <i>Drosophila</i> )                                        | -1.19 | 0.004039 |
| 220282_at   | RIC3      | resistance to inhibitors of cholinesterase 3 homolog ( <i>C. elegans</i> )            | -1.15 | 0.042841 |
| 209882_at   | RIT1      | Ras-like without CAAX 1                                                               | 1.84  | 0.003828 |
| 206154_at   | RLBP1     | retinaldehyde binding protein 1                                                       | -1.17 | 0.00086  |
| 212479_s_at | RMND5A    | required for meiotic nuclear division 5 homolog A ( <i>S. cerevisiae</i> )            | 1.21  | 0.005262 |
| 202636_at   | RNF103    | ring finger protein 103                                                               | 1.4   | 0.007326 |
| 212742_at   | RNF115    | ring finger protein 115                                                               | 1.21  | 0.020762 |
| 201780_s_at | RNF13     | ring finger protein 13                                                                | 1.63  | 0.011265 |
| 204040_at   | RNF144A   | ring finger protein 144A                                                              | 1.26  | 0.015747 |
| 218426_s_at | RNF216    | ring finger protein 216                                                               | 1.19  | 0.031322 |
| 218528_s_at | RNF38     | ring finger protein 38                                                                | 1.32  | 0.038531 |
| 221909_at   | RNFT2     | ring finger protein, transmembrane 2                                                  | 1.15  | 0.020202 |
| 220564_at   | RNLS      | renalase, FAD-dependent amine oxidase                                                 | -1.06 | 0.028945 |
| 202683_s_at | RNMT      | RNA (guanine-7-) methyltransferase                                                    | 1.15  | 0.044119 |
| 213044_at   | ROCK1     | Rho-associated, coiled-coil containing protein kinase 1                               | 1.34  | 0.045643 |
| 213588_x_at | RPL14     | ribosomal protein L14                                                                 | 1.11  | 0.042429 |



|             |           |                                                                                  |       |          |
|-------------|-----------|----------------------------------------------------------------------------------|-------|----------|
| 213084_x_at | RPL23A    | ribosomal protein L23a*                                                          | 1.06  | 0.047695 |
| 201406_at   | RPL36A    | ribosomal protein L36a*                                                          | 1.11  | 0.017958 |
| 218836_at   | RPP21     | ribonuclease P/MRP 21kDa subunit*                                                | 1.34  | 0.019706 |
| 213801_x_at | RPSA      | ribosomal protein SA*                                                            | 1.09  | 0.014939 |
| 218088_s_at | RRAGC     | Ras-related GTP binding C                                                        | 1.09  | 0.047826 |
| 208314_at   | RRH       | retinal pigment epithelium-derived rhodopsin homolog                             | -1.02 | 0.027419 |
| 202938_x_at | RRP7A     | ribosomal RNA processing 7 homolog A ( <i>S. cerevisiae</i> )*                   | -1.18 | 0.010663 |
| 213750_at   | RSL1D1    | ribosomal L1 domain containing 1                                                 | 1.32  | 0.040442 |
| 211509_s_at | RTN4      | reticulon 4                                                                      | 1.26  | 0.048525 |
| 209148_at   | RXRβ      | retinoid X receptor, beta                                                        | 1.26  | 0.03721  |
| 205485_at   | RYR1      | ryanodine receptor 1 (skeletal)                                                  | 1.27  | 0.000508 |
| 219129_s_at | SAP30L    | SAP30-like                                                                       | 1.39  | 0.013958 |
| 203408_s_at | SATB1     | SATB homeobox 1                                                                  | -1.36 | 0.006034 |
| 219196_at   | SCG3      | secretogranin III                                                                | -1.07 | 0.027476 |
| 218217_at   | SCPEP1    | serine carboxypeptidase 1                                                        | 2.05  | 0.00001  |
| 218427_at   | SDCCAG3   | serologically defined colon cancer antigen 3                                     | -1.18 | 0.017993 |
| 203090_at   | SDF2      | stromal cell-derived factor 2                                                    | 1.24  | 0.026678 |
| 215209_at   | SEC24D    | SEC24 family, member D ( <i>S. cerevisiae</i> )                                  | 1.14  | 0.040992 |
| 209889_at   | SEC31B    | SEC31 homolog B ( <i>S. cerevisiae</i> )                                         | -1.36 | 0.011867 |
| 208942_s_at | SEC62     | SEC62 homolog ( <i>S. cerevisiae</i> )                                           | 1.41  | 0.025335 |
| 221931_s_at | SEH1L     | SEH1-like ( <i>S. cerevisiae</i> )                                               | -1.57 | 0.04464  |
| 212314_at   | SEL1L3    | sel-1 suppressor of lin-12-like 3 ( <i>C. elegans</i> )                          | 1.23  | 0.016622 |
| 208671_at   | SERINC1   | serine incorporator 1                                                            | 1.74  | 0.001044 |
| 221471_at   | SERINC3   | serine incorporator 3                                                            | 1.42  | 0.000088 |
| 211428_at   | SERPINA1  | serpin peptidase inhibitor, clade A (alpha-1 antitrypsin, antitrypsin), member 1 | -1.12 | 0.002989 |
| 213572_s_at | SERPINB1  | serpin peptidase inhibitor, clade B (ovalbumin), member 1                        | -1.79 | 0.031991 |
| 211362_s_at | SERPINB13 | serpin peptidase inhibitor, clade B (ovalbumin), member 13                       | -1.18 | 0.049298 |
| 204614_at   | SERPINB2  | serpin peptidase inhibitor, clade B (ovalbumin), member 2                        | 5.24  | 0.028235 |
| 205352_at   | SERPINI1  | serpin peptidase inhibitor, clade I (neuroserpin), member 1                      | 1.55  | 0.002627 |
| 207636_at   | SERPINI2  | serpin peptidase inhibitor, clade I (pancpin), member 2                          | -1.07 | 0.031553 |
| 202657_s_at | SERTAD2   | SERTA domain containing 2                                                        | 1.49  | 0.044604 |
| 33323_r_at  | SFN       | stratifin                                                                        | -1.25 | 0.006076 |
| 210116_at   | SH2D1A    | SH2 domain containing 1A                                                         | -1.49 | 0.040874 |
| 204979_s_at | SH3BGR    | SH3 domain binding glutamic acid-rich protein                                    | 1.17  | 0.031554 |
| 209091_s_at | SH3GLB1   | SH3-domain GRB2-like endophilin B1                                               | 1.29  | 0.024163 |
| 202276_at   | SHFM1     | split hand/foot malformation (ectrodactyly) type 1                               | 1.24  | 0.014803 |
| 217304_at   | SHMT1     | serine hydroxymethyltransferase 1 (soluble)                                      | 1.07  | 0.016404 |
| 220047_at   | SIRT4     | sirtuin 4                                                                        | 1.13  | 0.017707 |

|             |          |                                                                                                  |       |          |
|-------------|----------|--------------------------------------------------------------------------------------------------|-------|----------|
| 206675_s_at | SKIL     | SKI-like oncogene                                                                                | 1.19  | 0.021301 |
| 203626_s_at | SKP2     | S-phase kinase-associated protein 2, E3 ubiquitin protein ligase                                 | -1.26 | 0.008984 |
| 208354_s_at | SLC12A3  | solute carrier family 12 (sodium/chloride transporters), member 3                                | -1.11 | 0.034603 |
| 220740_s_at | SLC12A6  | solute carrier family 12 (potassium/chloride transporters), member 6                             | 1.16  | 0.004865 |
| 207567_at   | SLC13A2  | solute carrier family 13 (sodium-dependent dicarboxylate transporter), member 2                  | -1.19 | 0.005119 |
| 210807_s_at | SLC16A7  | solute carrier family 16, member 7 (monocarboxylic acid transporter 2)                           | -1.24 | 0.013224 |
| 220455_at   | SLC16A8  | solute carrier family 16, member 8 (monocarboxylic acid transporter 3)                           | -1.11 | 0.034062 |
| 221041_s_at | SLC17A5  | solute carrier family 17 (anion/sugar transporter), member 5                                     | 1.29  | 0.01553  |
| 211576_s_at | SLC19A1  | solute carrier family 19 (folate transporter), member 1                                          | -1.34 | 0.025766 |
| 209610_s_at | SLC1A4   | solute carrier family 1 (glutamate/neutral amino acid transporter), member 4                     | 2.62  | 0.000289 |
| 202744_at   | SLC20A2  | solute carrier family 20 (phosphate transporter), member 2                                       | -1.05 | 0.047595 |
| 205074_at   | SLC22A5  | solute carrier family 22 (organic cation/carnitine transporter), member 5                        | 1.23  | 0.028402 |
| 57588_at    | SLC24A3  | solute carrier family 24 (sodium/potassium/calcium exchanger), member 3                          | -1.08 | 0.001113 |
| 203339_at   | SLC25A12 | solute carrier family 25 (aspartate/glutamate carrier), member 12                                | -1.39 | 0.03821  |
| 218653_at   | SLC25A15 | solute carrier family 25 (mitochondrial carrier; ornithine transporter) member 15                | -1.42 | 0.003773 |
| 214210_at   | SLC25A17 | solute carrier family 25 (mitochondrial carrier; peroxisomal membrane protein, 34kDa), member 17 | -1.23 | 0.019187 |
| 216712_at   | SLC25A30 | solute carrier family 25, member 30                                                              | -1.11 | 0.019447 |
| 221037_s_at | SLC25A31 | solute carrier family 25 (mitochondrial carrier; adenine nucleotide translocator), member 31     | -1.05 | 0.041109 |
| 220475_at   | SLC28A3  | solute carrier family 28 (sodium-coupled nucleoside transporter), member 3                       | -1.12 | 0.049509 |
| 201801_s_at | SLC29A1  | solute carrier family 29 (nucleoside transporters), member 1                                     | -1.66 | 0.034167 |
| 202499_s_at | SLC2A3   | solute carrier family 2 (facilitated glucose transporter), member 3                              | 1.53  | 0.023741 |
| 212907_at   | SLC30A1  | solute carrier family 30 (zinc transporter), member 1                                            | 1.23  | 0.038784 |
| 207035_at   | SLC30A3  | solute carrier family 30 (zinc transporter), member 3                                            | -1.2  | 0.040592 |
| 213083_at   | SLC35D2  | solute carrier family 35, member D2                                                              | 1.38  | 0.009419 |
| 218041_x_at | SLC38A2  | solute carrier family 38, member 2                                                               | 1.51  | 0.004118 |
| 218417_s_at | SLC48A1  | solute carrier family 48 (heme transporter), member 1                                            | 1.49  | 0.007574 |
| 218682_s_at | SLC4A1AP | solute carrier family 4 (anion exchanger), member 1, adaptor protein                             | 1.25  | 0.022794 |
| 217678_at   | SLC7A11  | solute carrier family 7 (anionic amino acid transporter light chain, xc- system), member 11      | 2.86  | 0.019317 |
| 216092_s_at | SLC7A8   | solute carrier family 7 (amino acid transporter light chain, L system), member 8                 | -1.22 | 0.019461 |
| 215267_s_at | SLC8A2   | solute carrier family 8 (sodium/calcium exchanger), member 2                                     | -1.15 | 0.042656 |
| 203909_at   | SLC9A6   | solute carrier family 9, subfamily A (NHE6, cation                                               | 1.33  | 0.014279 |

|             |         |                                                                                                      |       |          |
|-------------|---------|------------------------------------------------------------------------------------------------------|-------|----------|
|             |         | proton antiporter 6), member 6                                                                       |       |          |
| 219229_at   | SLCO3A1 | solute carrier organic anion transporter family, member 3A1                                          | 1.38  | 0.008873 |
| 209897_s_at | SLIT2   | slit homolog 2 (Drosophila)                                                                          | -1.1  | 0.041738 |
| 218137_s_at | SMAP1   | small ArfGAP 1                                                                                       | 1.41  | 0.006793 |
| 203875_at   | SMARCA1 | SWI/SNF related, matrix associated, actin dependent regulator of chromatin, subfamily a, member 1    | -1.13 | 0.0062   |
| 201072_s_at | SMARCC1 | SWI/SNF related, matrix associated, actin dependent regulator of chromatin, subfamily c, member 1    | -1.33 | 0.046858 |
| 209420_s_at | SMPD1   | sphingomyelin phosphodiesterase 1, acid lysosomal                                                    | 1.29  | 0.045355 |
| 202043_s_at | SMS     | spermine synthase                                                                                    | -1.64 | 0.003082 |
| 212922_s_at | SMYD2   | SET and MYND domain containing 2                                                                     | -1.34 | 0.029957 |
| 220405_at   | SNTG1   | syntrophin, gamma 1                                                                                  | -1.1  | 0.040497 |
| 202359_s_at | SNX19   | sorting nexin 19                                                                                     | 1.28  | 0.01616  |
| 203372_s_at | SOCS2   | suppressor of cytokine signaling 2                                                                   | -2.21 | 0.027473 |
| 200642_at   | SOD1    | superoxide dismutase 1, soluble                                                                      | 1.32  | 0.001128 |
| 201562_s_at | SORD    | sorbitol dehydrogenase                                                                               | -1.19 | 0.007311 |
| 212870_at   | SOS2    | son of sevenless homolog 2 (Drosophila)                                                              | 1.66  | 0.027643 |
| 208012_x_at | SP110   | SP110 nuclear body protein                                                                           | -1.37 | 0.002323 |
| 212470_at   | SPAG9   | sperm associated antigen 9                                                                           | 1.37  | 0.010317 |
| 220299_at   | SPATA6  | spermatogenesis associated 6                                                                         | 1.07  | 0.029139 |
| 221844_x_at | SPCS3   | signal peptidase complex subunit 3 homolog (S. cerevisiae)                                           | -1.22 | 0.017975 |
| 209436_at   | SPON1   | spondin 1, extracellular matrix protein                                                              | -1.07 | 0.039766 |
| 214026_s_at | SPRED2  | Sprouty-related, EVH1 domain containing 2                                                            | -1.16 | 0.021397 |
| 46256_at    | SPSB3   | splA/ryanodine receptor domain and SOCS box containing 3                                             | 1.43  | 0.017251 |
| 217995_at   | SQRDL   | sulfide quinone reductase-like (yeast)                                                               | 1.39  | 0.012451 |
| 201471_s_at | SQSTM1  | sequestosome 1                                                                                       | 2.35  | 0.000629 |
| 211056_s_at | SRD5A1  | steroid-5-alpha-reductase, alpha polypeptide 1 (3-oxo-5 alpha-steroid delta 4-dehydrogenase alpha 1) | 1.2   | 0.033153 |
| 202401_s_at | SRF     | serum response factor (c-fos serum response element-binding transcription factor)                    | -1.39 | 0.043122 |
| 201859_at   | SRGN    | serglycin                                                                                            | 1.2   | 0.021349 |
| 208920_at   | SRI     | sorcin                                                                                               | -1.42 | 0.007687 |
| 200685_at   | SRSF11  | serine/arginine-rich splicing factor 11                                                              | -1.42 | 0.030823 |
| 221752_at   | SSH1    | slingshot homolog 1 (Drosophila)                                                                     | 1.92  | 0.000306 |
| 210871_x_at | SSX2IP  | synovial sarcoma, X breakpoint 2 interacting protein                                                 | -1.18 | 0.026836 |
| 214971_s_at | ST6GAL1 | ST6 beta-galactosamide alpha-2,6-sialyltransferase 1                                                 | -1.14 | 0.040006 |
| 207871_s_at | ST7     | suppression of tumorigenicity 7*                                                                     | 1.39  | 0.008129 |
| 219753_at   | STAG3   | stromal antigen 3                                                                                    | -1.83 | 0.013845 |
| 221610_s_at | STAP2   | signal transducing adaptor family member 2                                                           | -1.34 | 0.027088 |
| 209969_s_at | STAT1   | signal transducer and activator of transcription 1, 91kDa                                            | 1.58  | 0.016881 |
| 207320_x_at | STAU1   | staufen, RNA binding protein, homolog 1 (Drosophila)                                                 | 1.18  | 0.048006 |
| 201062_at   | STOM    | stomatin                                                                                             | -1.01 | 0.048031 |

|             |         |                                                                                                  |       |          |
|-------------|---------|--------------------------------------------------------------------------------------------------|-------|----------|
| 209238_at   | STX3    | syntaxin 3                                                                                       | 1.33  | 0.009806 |
| 203457_at   | STX7    | syntaxin 7                                                                                       | 1.12  | 0.034068 |
| 221727_at   | SUB1    | SUB1 homolog ( <i>S. cerevisiae</i> )                                                            | -1.46 | 0.019691 |
| 207601_at   | SULT1B1 | sulfotransferase family, cytosolic, 1B, member 1                                                 | -1.23 | 0.000157 |
| 219934_s_at | SULT1E1 | sulfotransferase family 1E, estrogen-preferring, member 1                                        | 1.05  | 0.022234 |
| 206293_at   | SULT2A1 | sulfotransferase family, cytosolic, 2A, dehydroepiandrosterone (DHEA)-preferring, member 1       | 1.1   | 0.001415 |
| 201484_at   | SUPT4H1 | suppressor of Ty 4 homolog 1 ( <i>S. cerevisiae</i> )                                            | -1.43 | 0.00184  |
| 201836_s_at | SUPT7L  | suppressor of Ty 7 ( <i>S. cerevisiae</i> )-like                                                 | 1.28  | 0.006273 |
| 219389_at   | SUSD4   | sushi domain containing 4                                                                        | -1.3  | 0.002354 |
| 205551_at   | SV2B    | synaptic vesicle glycoprotein 2B                                                                 | -1.11 | 0.047294 |
| 202553_s_at | SYF2    | SYF2 homolog, RNA splicing factor ( <i>S. cerevisiae</i> )                                       | 1.41  | 0.005708 |
| 217833_at   | SYNCRIP | synaptotagmin binding, cytoplasmic RNA interacting protein                                       | -1.33 | 0.036491 |
| 213200_at   | SYP     | synaptophysin                                                                                    | -1.11 | 0.030883 |
| 209198_s_at | SYT11   | synaptotagmin XI                                                                                 | 1.7   | 0.004008 |
| 221859_at   | SYT13   | synaptotagmin XIII                                                                               | -1.15 | 0.045823 |
| 201463_s_at | TALDO1  | transaldolase 1                                                                                  | 1.26  | 0.005585 |
| 202813_at   | TARBP1  | TAR (HIV-1) RNA binding protein 1                                                                | -1.24 | 0.042283 |
| 221392_at   | TAS2R4  | taste receptor, type 2, member 4                                                                 | -1.19 | 0.006993 |
| 221858_at   | TBC1D12 | TBC1 domain family, member 12                                                                    | 1.24  | 0.000188 |
| 44696_at    | TBC1D13 | TBC1 domain family, member 13                                                                    | 1.19  | 0.024362 |
| 220260_at   | TBC1D19 | TBC1 domain family, member 19                                                                    | 1.47  | 0.003766 |
| 215640_at   | TBC1D2B | TBC1 domain family, member 2B                                                                    | -1.14 | 0.025107 |
| 209152_s_at | TCF3    | transcription factor 3 (E2A immunoglobulin enhancer binding factors E12/E47)                     | -1.17 | 0.018259 |
| 219839_x_at | TCL6    | T-cell leukemia/lymphoma 6 (non-protein coding)                                                  | -1.15 | 0.021209 |
| 205796_at   | TCP11L1 | t-complex 11 (mouse)-like 1                                                                      | 1.26  | 0.008328 |
| 213361_at   | TDRD7   | tudor domain containing 7                                                                        | -1.12 | 0.022537 |
| 201174_s_at | TERF2IP | telomeric repeat binding factor 2, interacting protein                                           | 1.31  | 0.001847 |
| 204106_at   | TESK1   | testis-specific kinase 1                                                                         | 1.2   | 0.015472 |
| 205287_s_at | TFAP2C  | transcription factor AP-2 gamma (activating enhancer binding protein 2 gamma)                    | -1.21 | 0.008629 |
| 212457_at   | TFE3    | transcription factor binding to IGHM enhancer 3                                                  | 1.35  | 0.001612 |
| 210215_at   | TFR2    | transferrin receptor 2                                                                           | -1.22 | 0.029406 |
| 203313_s_at | TGIF1   | TGFB-induced factor homeobox 1                                                                   | 1.83  | 0.00341  |
| 206008_at   | TGM1    | transglutaminase 1 (K polypeptide epidermal type I, protein-glutamine-gamma-glutamyltransferase) | -1.19 | 0.035659 |
| 211003_x_at | TGM2    | transglutaminase 2 (C polypeptide, protein-glutamine-gamma-glutamyltransferase)                  | 1.06  | 0.029542 |
| 203834_s_at | TGOLN2  | trans-golgi network protein 2                                                                    | 1.15  | 0.032404 |
| 220212_s_at | THADA   | thyroid adenoma associated                                                                       | -1.19 | 0.027384 |
| 219800_s_at | THNSL1  | threonine synthase-like 1 ( <i>S. cerevisiae</i> )                                               | 1.08  | 0.00085  |
| 213869_x_at | THY1    | Thy-1 cell surface antigen                                                                       | -1.34 | 0.014863 |

|             |          |                                                                |       |          |
|-------------|----------|----------------------------------------------------------------|-------|----------|
| 212665_at   | TIPARP   | TCDD-inducible poly(ADP-ribose) polymerase                     | 2.91  | 1.28E-07 |
| 212997_s_at | TLK2     | tousled-like kinase 2                                          | 1.18  | 0.033326 |
| 221702_s_at | TM2D3    | TM2 domain containing 3                                        | 1.24  | 0.00819  |
| 217730_at   | TMBIM1   | transmembrane BAX inhibitor motif containing 1                 | 1.41  | 0.013055 |
| 200803_s_at | TMBIM6   | transmembrane BAX inhibitor motif containing 6                 | 1.52  | 0.028486 |
| 43977_at    | TMEM161A | transmembrane protein 161A                                     | 1.21  | 0.003054 |
| 218345_at   | TMEM176A | transmembrane protein 176A                                     | -1.21 | 0.021634 |
| 219074_at   | TMEM184C | transmembrane protein 184C                                     | 1.27  | 0.048391 |
| 218113_at   | TMEM2    | transmembrane protein 2                                        | 1.25  | 0.048554 |
| 218008_at   | TMEM248  | transmembrane protein 248                                      | 1.25  | 0.043106 |
| 219600_s_at | TMEM50B  | transmembrane protein 50B                                      | 1.62  | 0.037533 |
| 218562_s_at | TMEM57   | transmembrane protein 57                                       | 1.36  | 0.004219 |
| 200620_at   | TMEM59   | transmembrane protein 59                                       | 1.37  | 0.002212 |
| 203661_s_at | TMOD1    | tropomodulin 1                                                 | 1.14  | 0.046431 |
| 209754_s_at | TMPO     | thymopoietin                                                   | -1.15 | 0.048531 |
| 211689_s_at | TMPRSS2  | transmembrane protease, serine 2                               | -1.18 | 0.022702 |
| 218960_at   | TMPRSS4  | transmembrane protease, serine 4                               | -1.23 | 0.028538 |
| 210260_s_at | TNFAIP8  | tumor necrosis factor, alpha-induced protein 8                 | 1.49  | 0.001407 |
| 208023_at   | TNFRSF4  | tumor necrosis factor receptor superfamily, member 4           | 1.1   | 0.049347 |
| 210643_at   | TNFSF11  | tumor necrosis factor (ligand) superfamily, member 11          | -1.6  | 0.027271 |
| 209500_x_at | TNFSF12  | tumor necrosis factor (ligand) superfamily, member 12*         | -1.33 | 0.008471 |
| 210314_x_at | TNFSF13  | tumor necrosis factor (ligand) superfamily, member 13          | -1.24 | 0.022534 |
| 207216_at   | TNFSF8   | tumor necrosis factor (ligand) superfamily, member 8           | -1.59 | 0.020449 |
| 204080_at   | TOE1     | target of EGR1, member 1 (nuclear)                             | -1.42 | 0.016616 |
| 202807_s_at | TOM1     | target of myb1 (chicken)                                       | 1.53  | 0.003119 |
| 200662_s_at | TOMM20   | translocase of outer mitochondrial membrane 20 homolog (yeast) | -1.36 | 0.02253  |
| 203050_at   | TP53BP1  | tumor protein p53 binding protein 1                            | 1.11  | 0.044562 |
| 209863_s_at | TP63     | tumor protein p63                                              | -1.1  | 0.039171 |
| 213616_at   | TPGS2    | tubulin polyglutamylase complex subunit 2                      | 1.27  | 0.021833 |
| 204140_at   | TPST1    | tyrosylprotein sulfotransferase 1                              | 1.17  | 0.018971 |
| 204658_at   | TRA2A    | transformer 2 alpha homolog (Drosophila)                       | -1.31 | 0.012081 |
| 208315_x_at | TRAF3    | TNF receptor-associated factor 3                               | 1.21  | 0.028105 |
| 209751_s_at | TRAPPC2  | trafficking protein particle complex 2*                        | 1.28  | 0.006034 |
| 219748_at   | TREML2   | triggering receptor expressed on myeloid cells-like 2          | -1.13 | 0.012467 |
| 202478_at   | TRIB2    | tribbles homolog 2 (Drosophila)                                | -1.15 | 0.04419  |
| 204732_s_at | TRIM23   | tripartite motif containing 23                                 | 1.35  | 0.0399   |
| 212436_at   | TRIM33   | tripartite motif containing 33                                 | 1.26  | 0.019014 |
| 219405_at   | TRIM68   | tripartite motif containing 68                                 | 1.43  | 0.012244 |
| 209778_at   | TRIP11   | thyroid hormone receptor interactor 11                         | 1.36  | 0.045916 |
| 201546_at   | TRIP12   | thyroid hormone receptor interactor 12                         | 1.45  | 0.001461 |
| 210882_s_at | TRO      | trophinin                                                      | 1.26  | 0.033242 |

|             |         |                                                                   |       |          |
|-------------|---------|-------------------------------------------------------------------|-------|----------|
| 209390_at   | TSC1    | tuberous sclerosis 1                                              | 1.27  | 0.001626 |
| 215111_s_at | TSC22D1 | TSC22 domain family, member 1                                     | 2.63  | 0.024772 |
| 203227_s_at | TSPAN31 | tetraspanin 31                                                    | 1.35  | 0.012002 |
| 209264_s_at | TSPAN4  | tetraspanin 4                                                     | -1.76 | 0.006755 |
| 205665_at   | TSPAN9  | tetraspanin 9                                                     | -1.05 | 0.021704 |
| 219481_at   | TTC13   | tetratricopeptide repeat domain 13                                | 1.23  | 0.004566 |
| 215849_x_at | TTC18   | tetratricopeptide repeat domain 18                                | -1.09 | 0.015983 |
| 218442_at   | TTC4    | tetratricopeptide repeat domain 4                                 | 1.26  | 0.0363   |
| 213172_at   | TTC9    | tetratricopeptide repeat domain 9                                 | -1.16 | 0.046155 |
| 219124_at   | TTI2    | TELO2 interacting protein 2                                       | 1.19  | 0.019019 |
| 205807_s_at | TUFT1   | tuftelin 1                                                        | 1.74  | 0.02024  |
| 205854_at   | TULP3   | tubby like protein 3                                              | 1.51  | 0.001282 |
| 213423_x_at | TUSC3   | tumor suppressor candidate 3                                      | -1.12 | 0.023204 |
| 219201_s_at | TWSG1   | twisted gastrulation homolog 1 (Drosophila)                       | 1.27  | 0.034096 |
| 208864_s_at | TXN     | thioredoxin                                                       | 1.69  | 0.006342 |
| 201588_at   | TXNL1   | thioredoxin-like 1                                                | 1.15  | 0.042239 |
| 201266_at   | TXNRD1  | thioredoxin reductase 1                                           | 2.31  | 0.000053 |
| 202589_at   | TYMS    | thymidylate synthetase                                            | -1.29 | 0.019517 |
| 46270_at    | UBAP1   | ubiquitin associated protein 1                                    | 1.25  | 0.030266 |
| 201899_s_at | UBE2A   | ubiquitin-conjugating enzyme E2A                                  | 1.16  | 0.000319 |
| 202347_s_at | UBE2K   | ubiquitin-conjugating enzyme E2K                                  | 1.47  | 0.049361 |
| 212751_at   | UBE2N   | ubiquitin-conjugating enzyme E2N                                  | -1.5  | 0.011168 |
| 218011_at   | UBL5    | ubiquitin-like 5                                                  | 1.14  | 0.046794 |
| 212756_s_at | UBR2    | ubiquitin protein ligase E3 component n-recognin 2                | 1.39  | 0.015452 |
| 211950_at   | UBR4    | ubiquitin protein ligase E3 component n-recognin 4                | 1.47  | 0.006463 |
| 212007_at   | UBXN4   | UBX domain protein 4                                              | 1.37  | 0.020971 |
| 201387_s_at | UCHL1   | ubiquitin carboxyl-terminal esterase L1 (ubiquitin thiolesterase) | 2.33  | 0.017151 |
| 209103_s_at | UFD1L   | ubiquitin fusion degradation 1 like (yeast)                       | 1.33  | 0.004539 |
| 217935_s_at | UQCC    | ubiquinol-cytochrome c reductase complex chaperone                | 1.2   | 0.041421 |
| 210157_at   | URI1    | URI1, prefoldin-like chaperone                                    | -1.14 | 0.020739 |
| 213327_s_at | USP12   | ubiquitin specific peptidase 12                                   | 1.31  | 0.046493 |
| 219211_at   | USP18   | ubiquitin specific peptidase 18                                   | -1.56 | 0.04248  |
| 207211_at   | USP2    | ubiquitin specific peptidase 2                                    | -1.13 | 0.027898 |
| 203965_at   | USP20   | ubiquitin specific peptidase 20                                   | 1.17  | 0.039818 |
| 221654_s_at | USP3    | ubiquitin specific peptidase 3                                    | 1.46  | 0.037349 |
| 221518_s_at | USP47   | ubiquitin specific peptidase 47                                   | 1.35  | 0.017005 |
| 201336_at   | VAMP3   | vesicle-associated membrane protein 3 (cellubrevin)               | 1.46  | 0.03382  |
| 208626_s_at | VAT1    | vesicle amine transport protein 1 homolog (T. californica)        | 1.26  | 0.027777 |
| 208649_s_at | VCP     | valosin containing protein                                        | 1.33  | 0.036214 |
| 217727_x_at | VPS35   | vacuolar protein sorting 35 homolog (S. cerevisiae)               | 1.13  | 0.01542  |
| 210849_s_at | VPS41   | vacuolar protein sorting 41 homolog (S. cerevisiae)               | 1.12  | 0.044093 |
| 218171_at   | VPS4B   | vacuolar protein sorting 4 homolog B (S. cerevisiae)              | 1.26  | 0.044345 |

|             |         |                                                                                                        |       |          |
|-------------|---------|--------------------------------------------------------------------------------------------------------|-------|----------|
| 218022_at   | VRK3    | vaccinia related kinase 3                                                                              | 1.15  | 0.044567 |
| 217742_s_at | WAC     | WW domain containing adaptor with coiled-coil                                                          | 1.31  | 0.04802  |
| 212264_s_at | WAPAL   | wings apart-like homolog (Drosophila)                                                                  | 1.23  | 0.018206 |
| 38964_r_at  | WAS     | Wiskott-Aldrich syndrome (eczema-thrombocytopenia)                                                     | -1.17 | 0.037156 |
| 202808_at   | WBP1L   | WW domain binding protein 1-like                                                                       | 1.41  | 0.005242 |
| 220917_s_at | WDR19   | WD repeat domain 19                                                                                    | 1.99  | 0.000032 |
| 218107_at   | WDR26   | WD repeat domain 26                                                                                    | 1.34  | 0.005237 |
| 217780_at   | WDR83OS | WD repeat domain 83 opposite strand                                                                    | 1.31  | 0.006728 |
| 209054_s_at | WHSC1   | Wolf-Hirschhorn syndrome candidate 1                                                                   | -1.14 | 0.041285 |
| 202031_s_at | WIPI2   | WD repeat domain, phosphoinositide interacting 2                                                       | 1.54  | 0.000271 |
| 219077_s_at | WWOX    | WW domain containing oxidoreductase                                                                    | -1.24 | 0.032831 |
| 205672_at   | XPA     | xeroderma pigmentosum, complementation group A                                                         | 1.25  | 0.034913 |
| 208643_s_at | XRCC5   | X-ray repair complementing defective repair in Chinese hamster cells 5 (double-strand-break rejoining) | -1.35 | 0.017312 |
| 217783_s_at | YPEL5   | yippee-like 5 (Drosophila)                                                                             | 1.87  | 0.017105 |
| 212455_at   | YTHDC1  | YTH domain containing 1                                                                                | 1.34  | 0.029284 |
| 201901_s_at | YY1     | YY1 transcription factor                                                                               | 1.29  | 0.031042 |
| 208087_s_at | ZBP1    | Z-DNA binding protein 1                                                                                | -1.17 | 0.025187 |
| 203958_s_at | ZBTB40  | zinc finger and BTB domain containing 40                                                               | 1.07  | 0.034668 |
| 204180_s_at | ZBTB43  | zinc finger and BTB domain containing 43                                                               | 1.65  | 0.032806 |
| 203026_at   | ZBTB5   | zinc finger and BTB domain containing 5                                                                | 1.26  | 0.037427 |
| 217486_s_at | ZDHHC17 | zinc finger, DHHC-type containing 17                                                                   | 1.05  | 0.041157 |
| 218020_s_at | ZFAND3  | zinc finger, AN1-type domain 3                                                                         | 1.12  | 0.031535 |
| 210275_s_at | ZFAND5  | zinc finger, AN1-type domain 5                                                                         | 1.57  | 0.013363 |
| 218968_s_at | ZFP64   | zinc finger protein 64 homolog (mouse)                                                                 | 1.18  | 0.017919 |
| 202050_s_at | ZMYM4   | zinc finger, MYM-type 4                                                                                | -1.08 | 0.030501 |
| 206182_at   | ZNF134  | zinc finger protein 134                                                                                | 1.13  | 0.03555  |
| 219854_at   | ZNF14   | zinc finger protein 14                                                                                 | 1.4   | 0.010913 |
| 204523_at   | ZNF140  | zinc finger protein 140                                                                                | 1.29  | 0.015397 |
| 37586_at    | ZNF142  | zinc finger protein 142                                                                                | 1.21  | 0.01875  |
| 205497_at   | ZNF175  | zinc finger protein 175                                                                                | 1.13  | 0.01359  |
| 213218_at   | ZNF187  | zinc finger protein 187                                                                                | 1.34  | 0.000365 |
| 205437_at   | ZNF211  | zinc finger protein 211                                                                                | 1.38  | 0.01507  |
| 203985_at   | ZNF212  | zinc finger protein 212                                                                                | 1.12  | 0.011126 |
| 219603_s_at | ZNF226  | zinc finger protein 226                                                                                | 1.18  | 0.049617 |
| 220350_at   | ZNF235  | zinc finger protein 235                                                                                | 1.26  | 0.000422 |
| 207164_s_at | ZNF238  | zinc finger protein 238                                                                                | 1.02  | 0.022441 |
| 213858_at   | ZNF250  | zinc finger protein 250                                                                                | 1.15  | 0.016228 |
| 214686_at   | ZNF266  | zinc finger protein 266                                                                                | 1.5   | 0.01765  |
| 204937_s_at | ZNF274  | zinc finger protein 274                                                                                | 1.57  | 0.001429 |
| 207753_at   | ZNF304  | zinc finger protein 304                                                                                | 1.33  | 0.017485 |
| 203521_s_at | ZNF318  | zinc finger protein 318                                                                                | 1.5   | 0.041587 |

|             |         |                                      |       |          |
|-------------|---------|--------------------------------------|-------|----------|
| 209538_at   | ZNF32   | zinc finger protein 32               | 1.44  | 0.014009 |
| 219765_at   | ZNF329  | zinc finger protein 329              | 1.42  | 0.022404 |
| 206096_at   | ZNF35   | zinc finger protein 35               | 1.07  | 0.048696 |
| 219224_x_at | ZNF408  | zinc finger protein 408              | 1.1   | 0.04247  |
| 209944_at   | ZNF410  | zinc finger protein 410              | 1.31  | 0.049951 |
| 219826_at   | ZNF419  | zinc finger protein 419              | 1.46  | 0.0019   |
| 218937_at   | ZNF434  | zinc finger protein 434              | 1.36  | 0.001636 |
| 219968_at   | ZNF589  | zinc finger protein 589              | -1.11 | 0.018219 |
| 212620_at   | ZNF609  | zinc finger protein 609              | -1.12 | 0.048793 |
| 220721_at   | ZNF614  | zinc finger protein 614              | 1.16  | 0.033088 |
| 205089_at   | ZNF7    | zinc finger protein 7                | 1.36  | 0.010257 |
| 218059_at   | ZNF706  | zinc finger protein 706              | -1.23 | 0.009736 |
| 215570_s_at | ZNF780A | zinc finger protein 780A*            | -1.09 | 0.046788 |
| 217541_x_at | ZNF816  | zinc finger protein 816*             | 1.13  | 0.030445 |
| 212544_at   | ZNHIT3  | zinc finger, HIT-type containing 3   | 1.2   | 0.013852 |
| 215263_at   | ZXDA    | zinc finger, X-linked, duplicated A* | 1.16  | 0.001625 |

---



Table S3: Selected gene ontology GO categories significantly affected by CSC stimulation.

| Group | GO ID      | GO categories | GO term                                         | Group P Value | Term P Value | % Associated Genes | Associated Genes Found                                                                                           |
|-------|------------|---------------|-------------------------------------------------|---------------|--------------|--------------------|------------------------------------------------------------------------------------------------------------------|
| 1     | GO:0021543 | BP            | pallium development                             | 1.23E-05      | 4.44E-05     | 11.1               | CNTNAP2, CYP17A1, DLX2, GRIN1, LEF1, PAFAH1B1, PSEN1, PTEN, SLIT2, SRF, TFAP2C, TSC1, ZBTB18                     |
| 1     | GO:0021761 | BP            | limbic system development                       | 1.23E-05      | 1.46E-04     | 11.5               | CNTNAP2, CRHR1, CYP17A1, DLX2, LEF1, PAFAH1B1, PTEN, SRF, TSC1, ZBTB18                                           |
| 1     | GO:0021766 | BP            | hippocampus development                         | 1.23E-05      | 1.86E-04     | 13.8               | CYP17A1, DLX2, LEF1, PAFAH1B1, PTEN, SRF, TSC1, ZBTB18                                                           |
| 2     | GO:0042503 | BP            | tyrosine phosphorylation of Stat3 protein       | 5.02E-05      | 1.33E-04     | 18.4               | IL21, IL23A, IL6R, LEP, LIF, OSM, PTPN2                                                                          |
| 2     | GO:0042508 | BP            | tyrosine phosphorylation of Stat1 protein       | 5.02E-05      | 1.41E-04     | 29.4               | IL21, IL23A, LIF, OSM, PTPN2                                                                                     |
| 3     | GO:0008585 | BP            | female gonad development                        | 3.30E-05      | 1.50E-04     | 10.5               | ARRB1, BRCA2, CTNNA1, EREG, ESR1, FOXO3, KDR, LEP, SLIT2, SOD1, TIPARP                                           |
| 3     | GO:0001541 | BP            | ovarian follicle development                    | 3.30E-05      | 5.54E-04     | 13.5               | ARRB1, CTNNA1, EREG, ESR1, FOXO3, KDR, SOD1                                                                      |
| 3     | GO:0001547 | BP            | antral ovarian follicle growth                  | 3.30E-05      | 6.76E-04     | 50.0               | EREG, ESR1, FOXO3                                                                                                |
| 4     | GO:0043523 | BP            | regulation of neuron apoptotic process          | 1.41E-06      | 9.59E-06     | 10.2               | DDIT3, FOXO3, GCLC, GCLM, GRIN1, HMOX1, JUN, NQO1, NR4A2, NTRK1, PINK1, PPP2R2B, PRDX2, PSEN1, ROCK1, SOD1, TP63 |
| 4     | GO:0043524 | BP            | negative regulation of neuron apoptotic process | 1.41E-06      | 1.14E-04     | 10.6               | GCLC, GCLM, GRIN1, HMOX1, JUN, NR4A2, NTRK1, PINK1,                                                              |

|   |            |    |                                                                |          |          |      |                                                                                                      |
|---|------------|----|----------------------------------------------------------------|----------|----------|------|------------------------------------------------------------------------------------------------------|
| 5 | GO:0050772 | BP | positive regulation of axonogenesis                            | 2.18E-05 | 1.12E-04 | 16.7 | PRDX2, PSEN1, ROCK1, SOD1, FXN, GOLGA2, NTRK3, OPTN, PAFAH1B1, RAB11A, SKIL, SLIT2                   |
| 5 | GO:0045773 | BP | positive regulation of axon extension                          | 2.18E-05 | 5.64E-04 | 20.8 | FXN, NTRK3, OPTN, PAFAH1B1, RAB11A                                                                   |
| 6 | GO:0060443 | BP | mammary gland morphogenesis                                    | 2.28E-05 | 1.07E-04 | 14.3 | CAV3, CCNH, ELF3, ESR1, ETV5, LRP5, NCOA3, SLIT2, TFAP2C                                             |
| 6 | GO:0061180 | BP | mammary gland epithelium development                           | 2.28E-05 | 1.22E-04 | 12.3 | BRCA2, CAV3, CCNH, ESR1, ETV5, LRP5, NCOA3, SLIT2, TFAP2C, TNFSF11                                   |
| 7 | GO:0002685 | BP | regulation of leukocyte migration                              | 3.14E-05 | 1.41E-04 | 10.7 | CCR7, CXCL11, CXCL13, GAL, HMOX1, IL23A, IL6R, MKL1, PAFAH1B1, RPSA, SLIT2                           |
| 7 | GO:0002688 | BP | regulation of leukocyte chemotaxis                             | 3.14E-05 | 1.50E-04 | 12.7 | CCR7, CXCL11, CXCL13, IL23A, IL6R, MKL1, PAFAH1B1, RPSA, SLIT2                                       |
| 7 | GO:0090022 | BP | regulation of neutrophil chemotaxis                            | 3.14E-05 | 7.88E-04 | 19.2 | CCR7, IL23A, MKL1, RPSA, SLIT2                                                                       |
| 8 | GO:0030330 | BP | DNA damage response, signal transduction by p53 class mediator | 9.92E-07 | 7.54E-06 | 12.1 | BRCA2, FOXO3, KAT5, NBN, NDRG1, PSMA1, PSMB1, PSMB7, PSMB8, PSMB9, PSMD1, PSMD14, PSMD2, PSMD4, TP63 |
| 8 | GO:0031397 | BP | negative regulation of protein ubiquitination                  | 9.92E-07 | 4.84E-05 | 11.2 | ARRB1, CHP1, GCLC, PSEN1, PSMA1, PSMB1, PSMB7, PSMB8, PSMB9, PSMD1, PSMD14, PSMD2, PSMD4             |
| 8 | GO:0044773 | BP | mitotic DNA damage                                             | 9.92E-07 | 1.17E-04 | 11.7 | NBN, PSMA1, PSMB1,                                                                                   |

|   |            |    |                                                                                               |          |          |      |                                                                                                           |
|---|------------|----|-----------------------------------------------------------------------------------------------|----------|----------|------|-----------------------------------------------------------------------------------------------------------|
|   |            |    | checkpoint                                                                                    |          |          |      | PSMB7, PSMB8, PSMB9, PSMD1, PSMD14, PSMD2, PSMD4, TP63                                                    |
| 8 | GO:0051444 | BP | negative regulation of ubiquitin-protein ligase activity                                      | 9.92E-07 | 1.17E-04 | 12.2 | PSEN1, PSMA1, PSMB1, PSMB7, PSMB8, PSMB9, PSMD1, PSMD14, PSMD2, PSMD4                                     |
| 8 | GO:0051437 | BP | positive regulation of ubiquitin-protein ligase activity involved in mitotic cell cycle       | 9.92E-07 | 1.22E-04 | 12.3 | PSMA1, PSMB1, PSMB7, PSMB8, PSMB9, PSMD1, PSMD14, PSMD2, PSMD4, PTEN                                      |
| 8 | GO:2000134 | BP | negative regulation of G1/S transition of mitotic cell cycle                                  | 9.92E-07 | 1.45E-04 | 10.6 | PSMA1, PSMB1, PSMB7, PSMB8, PSMB9, PSMD1, PSMD14, PSMD2, PSMD4, PTEN, TP63                                |
| 8 | GO:0006977 | BP | DNA damage response, signal transduction by p53 class mediator resulting in cell cycle arrest | 9.92E-07 | 1.91E-04 | 12.2 | PSMA1, PSMB1, PSMB7, PSMB8, PSMB9, PSMD1, PSMD14, PSMD2, PSMD4                                            |
| 9 | GO:0006302 | BP | double-strand break repair                                                                    | 9.40E-07 | 9.60E-06 | 11.7 | BRCA2, BRE, FEN1, KAT5, NBN, POLA1, PRKDC, PSMD14, RAD54L, SHFM1, SOD1, TERF2IP, TP53BP1, VCP, XRCC5, YY1 |
| 9 | GO:0000724 | BP | double-strand break repair via homologous recombination                                       | 9.40E-07 | 3.79E-04 | 12.3 | BRCA2, NBN, PSMD14, RAD54L, SHFM1, TERF2IP, TP53BP1, YY1                                                  |
|   | GO:0006271 | BP | DNA strand elongation involved in DNA replication                                             |          | 4.42E-05 | 21.1 | CDC45, FEN1, MCM3, MCM4, MCM7, PCNA, POLA1, RFC1                                                          |
|   | GO:0045682 | BP | regulation of epidermis development                                                           |          | 1.17E-04 | 16.0 | AQP3, KEAP1, MAFF, MAFG, NCOA3,                                                                           |

|            |    |                                                              |          |      |                                                                               |
|------------|----|--------------------------------------------------------------|----------|------|-------------------------------------------------------------------------------|
| GO:0046916 | BP | cellular transition metal ion homeostasis                    | 1.22E-04 | 10.8 | ROCK1, TFAP2C, TP63                                                           |
| GO:0006289 | BP | nucleotide-excision repair                                   | 1.88E-04 | 10.9 | APLP2, ATP6V0A1, ATP6V1D, FTH1, FTL, FXN, HELLS, HMOX1, SOD1, SRI, TFR2, TP63 |
| GO:0045639 | BP | positive regulation of myeloid cell differentiation          | 1.91E-04 | 12.2 | ATXN3, BRCA2, CCNH, ERCC6, NTHL1, PCNA, POLA1, POLR2C, RFC1, XPA              |
| GO:0018126 | BP | protein hydroxylation                                        | 1.97E-04 | 75.0 | ACVR1B, FOXO3, HSPA1A, IL23A, JUN, LEF1, LEP, LIF, TNFSF11                    |
| GO:0043217 | BP | myelin maintenance                                           | 2.81E-04 | 36.4 | ASPH, HIF1AN, JMJD6                                                           |
| GO:0000723 | BP | telomere maintenance                                         | 3.03E-04 | 11.3 | CXCR4, NDRG1, PTEN, SOD1                                                      |
| GO:0004714 | MF | transmembrane receptor protein tyrosine kinase activity      | 8.04E-04 | 10.8 | FEN1, NBN, PCNA, POLA1, PRKDC, PTEN, RFC1, TERF2IP, XRCC5                     |
| GO:1901019 | BP | regulation of calcium ion transmembrane transporter activity | 9.92E-04 | 14.3 | ALK, CCNH, INSR, KDR, MET, NTRK1, NTRK3, OPTN                                 |
|            |    |                                                              |          |      | ASPH, CAV3, CRHR1, MYO5A, PICALM, SRI                                         |

---

Table S4: up and down regulated genes in PBMCs of heavy smokers compared with light smokers.

| Probe Set   | Symbol   | Description                                                                        | Fold  | P value  |
|-------------|----------|------------------------------------------------------------------------------------|-------|----------|
| 205434_s_at | AAK1     | AP2 associated kinase 1                                                            | 1.69  | 0.045538 |
| 206527_at   | ABAT     | 4-aminobutyrate aminotransferase                                                   | -1.22 | 0.019255 |
| 204567_s_at | ABCG1    | ATP-binding cassette, sub-family G (WHITE), member 1                               | 1.23  | 0.009608 |
| 212895_s_at | ABR      | active BCR-related                                                                 | 1.19  | 0.01612  |
| 220845_at   | ACOXL    | acyl-CoA oxidase-like                                                              | -1.09 | 0.030009 |
| 201550_x_at | ACTG1    | actin, gamma 1                                                                     | 1.12  | 0.004449 |
| 209765_at   | ADAM19   | ADAM metallopeptidase domain 19                                                    | 1.25  | 0.041374 |
| 208268_at   | ADAM28   | ADAM metallopeptidase domain 28                                                    | 1.54  | 0.035062 |
| 211239_s_at | ADAM7    | ADAM metallopeptidase domain 7                                                     | -1.07 | 0.013989 |
| 205180_s_at | ADAM8    | ADAM metallopeptidase domain 8                                                     | 1.06  | 0.048962 |
| 220208_at   | ADAMTS13 | ADAM metallopeptidase with thrombospondin type 1 motif, 13                         | -1.13 | 0.019926 |
| 214736_s_at | ADD1     | adducin 1 (alpha)                                                                  | 1.18  | 0.03279  |
| 208544_at   | ADRA2B   | adrenoceptor alpha 2B                                                              | -1.16 | 0.047122 |
| 212285_s_at | AGRN     | agrin                                                                              | -1.09 | 0.049947 |
| 201782_s_at | AIP      | aryl hydrocarbon receptor interacting protein                                      | 1.19  | 0.033903 |
| 205633_s_at | ALAS1    | aminolevulinate, delta-, synthase 1                                                | 1.24  | 0.010035 |
| 209646_x_at | ALDH1B1  | aldehyde dehydrogenase 1 family, member B1                                         | -1.11 | 0.035284 |
| 214340_at   | ALOX12P2 | arachidonate 12-lipoxygenase pseudogene 2                                          | -1.1  | 0.019988 |
| 218093_s_at | ANKRD10  | ankyrin repeat domain 10                                                           | 1.27  | 0.027256 |
| 205678_at   | AP3B2    | adaptor-related protein complex 3, beta 2 subunit                                  | -1.07 | 0.038512 |
| 220023_at   | APOBR    | apolipoprotein B receptor                                                          | 1.35  | 0.015129 |
| 212883_at   | APOE     | Apolipoprotein E                                                                   | -1.11 | 0.023126 |
| 211975_at   | ARFGAP2  | ADP-ribosylation factor GTPase activating protein 2                                | 1.3   | 0.023669 |
| 218076_s_at | ARHGAP17 | Rho GTPase activating protein 17                                                   | 1.22  | 0.00482  |
| 204882_at   | ARHGAP25 | Rho GTPase activating protein 25                                                   | 1.09  | 0.030776 |
| 213039_at   | ARHGEF18 | Rho/Rac guanine nucleotide exchange factor (GEF) 18                                | 1.16  | 0.043842 |
| 205109_s_at | ARHGEF4  | Rho guanine nucleotide exchange factor (GEF) 4                                     | -1.08 | 0.045059 |
| 203263_s_at | ARHGEF9  | Cdc42 guanine nucleotide exchange factor (GEF) 9                                   | 1.17  | 0.046553 |
| 218694_at   | ARMCX1   | armadillo repeat containing, X-linked 1                                            | -1.04 | 0.019523 |
| 207220_at   | ART4     | ADP-ribosyltransferase 4 (Dombrock blood group)                                    | 1.1   | 0.030474 |
| 217228_s_at | ASB4     | ankyrin repeat and SOCS box containing 4                                           | -1.07 | 0.013363 |
| 214993_at   | ASPHD1   | aspartate beta-hydroxylase domain containing 1                                     | -1.09 | 0.014294 |
| 203364_s_at | ATG13    | autophagy related 13                                                               | 1.14  | 0.012994 |
| 207367_at   | ATP12A   | ATPase, H <sup>+</sup> /K <sup>+</sup> transporting, nongastric, alpha polypeptide | -1.14 | 0.018688 |
| 207546_at   | ATP4B    | ATPase, H <sup>+</sup> /K <sup>+</sup> exchanging, beta polypeptide                | -1.06 | 0.023001 |
| 202622_s_at | ATXN2    | ataxin 2                                                                           | 1.21  | 0.006493 |
| 211107_s_at | AURKC    | aurora kinase C                                                                    | -1.21 | 0.036706 |

|             |          |                                                                       |       |          |
|-------------|----------|-----------------------------------------------------------------------|-------|----------|
| 216231_s_at | B2M      | beta-2-microglobulin                                                  | -1.12 | 0.024723 |
| 206435_at   | B4GALNT1 | beta-1,4-N-acetyl-galactosaminyl transferase 1                        | -1.16 | 0.028274 |
| 211631_x_at | B4GALT1  | UDP-Gal:betaGlcNAc beta 1,4- galactosyltransferase, polypeptide 1     | -1.12 | 0.001691 |
| 209364_at   | BAD      | BCL2-associated agonist of cell death                                 | 1.1   | 0.047134 |
| 210208_x_at | BAG6     | BCL2-associated athanogene 6                                          | 1.19  | 0.016452 |
| 219966_x_at | BANP     | BTG3 associated nuclear protein                                       | 1.29  | 0.027637 |
| 219497_s_at | BCL11A   | B-cell CLL/lymphoma 11A (zinc finger protein)                         | 1.51  | 0.006776 |
| 203795_s_at | BCL7A    | B-cell CLL/lymphoma 7A                                                | 1.16  | 0.034964 |
| 205870_at   | BDKRB2   | bradykinin receptor B2                                                | -1.07 | 0.048732 |
| 214643_x_at | BIN1     | bridging integrator 1                                                 | 1.15  | 0.009817 |
| 222199_s_at | BIN3     | bridging integrator 3                                                 | 1.14  | 0.00716  |
| 202094_at   | BIRC5    | baculoviral IAP repeat containing 5                                   | -1.08 | 0.044568 |
| 206255_at   | BLK      | B lymphoid tyrosine kinase                                            | 1.57  | 0.006269 |
| 210462_at   | BLZF1    | basic leucine zipper nuclear factor 1                                 | -1.05 | 0.034465 |
| 218004_at   | BSDC1    | BSD domain containing 1                                               | 1.18  | 0.041418 |
| 205298_s_at | BTN2A2   | butyrophilin, subfamily 2, member A2                                  | 1.28  | 0.026617 |
| 209642_at   | BUB1     | budding uninhibited by benzimidazoles 1 homolog (yeast)               | -1.09 | 0.006698 |
| 217463_s_at | C11orf9  | chromosome 11 open reading frame 9                                    | -1.07 | 0.013861 |
| 219022_at   | C12orf43 | chromosome 12 open reading frame 43                                   | 1.13  | 0.004396 |
| 211034_s_at | C12orf51 | chromosome 12 open reading frame 51                                   | 1.1   | 0.014476 |
| 218130_at   | C17orf62 | chromosome 17 open reading frame 62                                   | 1.3   | 0.042792 |
| 221048_x_at | C17orf80 | chromosome 17 open reading frame 80                                   | -1.11 | 0.0018   |
| 218983_at   | C1RL     | complement component 1, r subcomponent-like                           | 1.09  | 0.002485 |
| 218089_at   | C20orf4  | chromosome 20 open reading frame 4                                    | 1.12  | 0.046835 |
| 221211_s_at | C21orf7  | chromosome 21 open reading frame 7                                    | -1.59 | 0.028158 |
| 219261_at   | C7orf26  | chromosome 7 open reading frame 26                                    | 1.23  | 0.042438 |
| 206208_at   | CA4      | carbonic anhydrase IV                                                 | -1.07 | 0.017811 |
| 213688_at   | CALM1    | calmodulin 1 (phosphorylase kinase, delta)*                           | -1.06 | 0.040881 |
| 210349_at   | CAMK4    | calcium/calmodulin-dependent protein kinase IV                        | -1.2  | 0.046824 |
| 212763_at   | CAMSAP2  | calmodulin regulated spectrin-associated protein family, member 2     | -1.1  | 0.043472 |
| 212948_at   | CAMTA2   | calmodulin binding transcription activator 2                          | 1.25  | 0.020315 |
| 208063_s_at | CAPN9    | calpain 9                                                             | -1.1  | 0.018169 |
| 218153_at   | CARS2    | cysteinyl-tRNA synthetase 2, mitochondrial (putative)                 | 1.22  | 0.046066 |
| 206011_at   | CASP1    | caspase 1, apoptosis-related cysteine peptidase                       | 1.07  | 0.046561 |
| 213373_s_at | CASP8    | caspase 8, apoptosis-related cysteine peptidase                       | 1.17  | 0.040053 |
| 208056_s_at | CBFA2T3  | core-binding factor, runt domain, alpha subunit 2; translocated to, 3 | 1.08  | 0.036538 |
| 212126_at   | CBX5     | chromobox homolog 5                                                   | 1.31  | 0.00853  |
| 218026_at   | CCDC56   | coiled-coil domain containing 56                                      | 1.18  | 0.031604 |
| 204606_at   | CCL21    | chemokine (C-C motif) ligand 21                                       | -1.17 | 0.041527 |
| 206398_s_at | CD19     | CD19 molecule                                                         | 1.42  | 0.014997 |
| 209583_s_at | CD200    | CD200 molecule                                                        | 1.28  | 0.037472 |

|             |          |                                                                     |       |          |
|-------------|----------|---------------------------------------------------------------------|-------|----------|
| 204581_at   | CD22     | CD22 molecule                                                       | 1.38  | 0.029503 |
| 207315_at   | CD226    | CD226 molecule                                                      | -1.31 | 0.016308 |
| 208650_s_at | CD24     | CD24 molecule                                                       | 1.37  | 0.005202 |
| 204192_at   | CD37     | CD37 molecule                                                       | 1.47  | 0.014096 |
| 215925_s_at | CD72     | CD72 molecule                                                       | 1.31  | 0.026785 |
| 205049_s_at | CD79A    | CD79a molecule, immunoglobulin-associated alpha                     | 1.6   | 0.00147  |
| 205297_s_at | CD79B    | CD79b molecule, immunoglobulin-associated beta                      | 1.67  | 0.013861 |
| 200675_at   | CD81     | CD81 molecule                                                       | 1.3   | 0.039221 |
| 202910_s_at | CD97     | CD97 molecule                                                       | 1.29  | 0.022422 |
| 204695_at   | CDC25A   | cell division cycle 25 homolog A (S. pombe)                         | -1.11 | 0.017441 |
| 201253_s_at | CDIPT    | CDP-diacylglycerol--inositol 3-phosphatidyltransferase              | 1.19  | 0.038556 |
| 209489_at   | CELF1    | CUGBP, Elav-like family member 1                                    | 1.15  | 0.016439 |
| 202157_s_at | CELF2    | CUGBP, Elav-like family member 2                                    | 1.13  | 0.033131 |
| 219472_at   | CENPO    | centromere protein O                                                | -1.19 | 0.023442 |
| 204074_s_at | CEP104   | centrosomal protein 104kDa                                          | -1.15 | 0.037093 |
| 213644_at   | CEP112   | centrosomal protein 112kDa                                          | -1.08 | 0.047107 |
| 221378_at   | CER1     | cerberus 1, cysteine knot superfamily, homolog (Xenopus laevis)     | -1.21 | 0.025586 |
| 212616_at   | CHD9     | chromodomain helicase DNA binding protein 9                         | 1.36  | 0.017644 |
| 202230_s_at | CHERP    | calcium homeostasis endoplasmic reticulum protein                   | 1.23  | 0.029935 |
| 206079_at   | CHML     | choroideremia-like (Rab escort protein 2)                           | -1.14 | 0.011641 |
| 55093_at    | CHPF2    | chondroitin polymerizing factor 2                                   | 1.16  | 0.049118 |
| 216886_at   | CHRNA4   | cholinergic receptor, nicotinic, alpha 4 (neuronal)                 | -1.08 | 0.035225 |
| 207274_at   | CHRNE    | cholinergic receptor, nicotinic, epsilon (muscle)                   | -1.07 | 0.04677  |
| 221295_at   | CIDEA    | cell death-inducing DFFA-like effector a                            | -1.14 | 0.014976 |
| 216708_x_at | CKAP2    | Cytoskeleton associated protein 2                                   | -1.14 | 0.013118 |
| 212832_s_at | CKAP5    | cytoskeleton associated protein 5                                   | 1.15  | 0.029148 |
| 38069_at    | CLCN7    | chloride channel, voltage-sensitive 7                               | 1.17  | 0.045131 |
| 206908_s_at | CLDN11   | claudin 11                                                          | -1.04 | 0.046664 |
| 207995_s_at | CLEC4M   | C-type lectin domain family 4, member M                             | -1.06 | 0.025636 |
| 201561_s_at | CLSTN1   | calsyntenin 1                                                       | 1.13  | 0.043413 |
| 210204_s_at | CNOT4    | CCR4-NOT transcription complex, subunit 4                           | -1.14 | 0.029573 |
| 215393_s_at | COBLL1   | COBL-like 1                                                         | -1.05 | 0.042944 |
| 202312_s_at | COL1A1   | collagen, type I, alpha 1                                           | -1.18 | 0.04668  |
| 217404_s_at | COL2A1   | collagen, type II, alpha 1                                          | -1.02 | 0.049192 |
| 215076_s_at | COL3A1   | collagen, type III, alpha 1                                         | -1.05 | 0.033972 |
| 209132_s_at | COMM4    | COMM domain containing 4                                            | 1.07  | 0.033229 |
| 213486_at   | COPG2IT1 | COPG2 imprinted transcript 1 (non-protein coding)                   | -1.1  | 0.034903 |
| 209029_at   | COPS7A   | COP9 constitutive photomorphogenic homolog subunit 7A (Arabidopsis) | 1.24  | 0.01136  |
| 219997_s_at | COPS7B   | COP9 constitutive photomorphogenic homolog subunit 7B (Arabidopsis) | 1.1   | 0.03811  |
| 217994_x_at | CPSF3L   | cleavage and polyadenylation specific factor 3-like                 | 1.16  | 0.033242 |
| 211897_s_at | CRHR1    | corticotropin releasing hormone receptor 1                          | -1.05 | 0.030259 |

|             |          |                                                                    |       |          |
|-------------|----------|--------------------------------------------------------------------|-------|----------|
| 210199_at   | CRYAA    | crystallin, alpha A                                                | -1.16 | 0.004625 |
| 209283_at   | CRYAB    | crystallin, alpha B                                                | -1.13 | 0.022911 |
| 206843_at   | CRYBA4   | crystallin, beta A4                                                | -1.17 | 0.006151 |
| 205958_x_at | CSHL1    | chorionic somatomammotropin hormone-like 1                         | -1.13 | 0.013084 |
| 202329_at   | CSK      | c-src tyrosine kinase                                              | 1.25  | 0.007213 |
| 208774_at   | CSNK1D   | casein kinase 1, delta                                             | 1.15  | 0.041918 |
| 217332_at   | CTAGE11P | CTAGE family, member 11, pseudogene                                | -1.08 | 0.023704 |
| 203392_s_at | CTBP1    | C-terminal binding protein 1                                       | 1.62  | 0.022717 |
| 218058_at   | CXXC1    | CXXC finger protein 1                                              | 1.2   | 0.021062 |
| 215785_s_at | CYFIP2   | cytoplasmic FMR1 interacting protein 2                             | 1.16  | 0.045633 |
| 215103_at   | CYP2C18  | cytochrome P450, family 2, subfamily C, polypeptide 18             | -1.06 | 0.009938 |
| 215809_at   | CYP2D6   | cytochrome P450, family 2, subfamily D, polypeptide 6              | -1.13 | 0.018437 |
| 216720_at   | CYP2U1   | cytochrome P450, family 2, subfamily U, polypeptide 1              | -1.04 | 0.035903 |
| 201278_at   | DAB2     | disabled homolog 2, mitogen-responsive phosphoprotein (Drosophila) | -1.35 | 0.048771 |
| 212128_s_at | DAG1     | dystroglycan 1 (dystrophin-associated glycoprotein 1)              | -1.19 | 0.028564 |
| 214334_x_at | DAZAP2   | DAZ associated protein 2                                           | 1.05  | 0.017854 |
| 206450_at   | DBH      | dopamine beta-hydroxylase (dopamine beta-monooxygenase)            | -1.18 | 0.0479   |
| 220843_s_at | DCAF13   | DDB1 and CUL4 associated factor 13                                 | 1     | 0.046855 |
| 91952_at    | DCAF15   | DDB1 and CUL4 associated factor 15                                 | 1.29  | 0.045833 |
| 221744_at   | DCAF7    | DDB1 and CUL4 associated factor 7                                  | 1.25  | 0.011464 |
| 210137_s_at | DCTD     | dCMP deaminase                                                     | 1.14  | 0.006416 |
| 217973_at   | DCXR     | dicarbonyl/L-xylulose reductase                                    | 1.37  | 0.022995 |
| 219111_s_at | DDX54    | DEAD (Asp-Glu-Ala-Asp) box polypeptide 54                          | 1.1   | 0.047008 |
| 221885_at   | DENND2A  | DENN/MADD domain containing 2A                                     | -1.2  | 0.015192 |
| 203695_s_at | DFNA5    | deafness, autosomal dominant 5                                     | 1.13  | 0.029246 |
| 204383_at   | DGCR14   | DiGeorge syndrome critical region gene 14*                         | 1.12  | 0.011305 |
| 214079_at   | DHRS2    | dehydrogenase/reductase (SDR family) member 2                      | -1.08 | 0.034733 |
| 203694_s_at | DHX16    | DEAH (Asp-Glu-Ala-His) box polypeptide 16                          | 1.19  | 0.008093 |
| 216281_at   | DICER1   | dicer 1, ribonuclease type III                                     | -1.06 | 0.03859  |
| 211150_s_at | DLAT     | dihydrolipoamide S-acetyltransferase                               | -1.25 | 0.008673 |
| 213707_s_at | DLX5     | distal-less homeobox 5                                             | -1.14 | 0.007215 |
| 210487_at   | DNTT     | deoxynucleotidyltransferase, terminal                              | -1.1  | 0.005068 |
| 205983_at   | DPEP1    | dipeptidase 1 (renal)                                              | -1.2  | 0.025419 |
| 205493_s_at | DPYSL4   | dihydropyrimidinase-like 4                                         | -1.09 | 0.047259 |
| 220154_at   | DST      | dystonin                                                           | -1.08 | 0.00598  |
| 215295_at   | DTNB     | dystrobrevin, beta                                                 | -1.03 | 0.037989 |
| 47105_at    | DUS2L    | dihydrouridine synthase 2-like, SMM1 homolog (S. cerevisiae)       | 1.1   | 0.047135 |
| 205762_s_at | DUS4L    | dihydrouridine synthase 4-like (S. cerevisiae)                     | 1.03  | 0.048359 |
| 203230_at   | DVL1     | dishevelled, dsh homolog 1 (Drosophila)                            | 1.12  | 0.024272 |
| 211928_at   | DYNC1H1  | dynein, cytoplasmic 1, heavy chain 1                               | 1.23  | 0.01802  |



|             |         |                                                                |       |          |
|-------------|---------|----------------------------------------------------------------|-------|----------|
| 204557_s_at | DZIP1   | DAZ interacting protein 1                                      | -1.06 | 0.011082 |
| 202023_at   | EFNA1   | ephrin-A1                                                      | -1.09 | 0.014445 |
| 202669_s_at | EFNB2   | ephrin-B2                                                      | -1.14 | 0.027153 |
| 221755_at   | EHBP1L1 | EH domain binding protein 1-like 1                             | 1.65  | 0.022281 |
| 209039_x_at | EHD1    | EH-domain containing 1                                         | 1.26  | 0.004011 |
| 203462_x_at | EIF3B   | eukaryotic translation initiation factor 3, subunit B          | 1.25  | 0.00231  |
| 219599_at   | EIF4B   | eukaryotic translation initiation factor 4B*                   | -1.46 | 0.040238 |
| 55692_at    | ELMO2   | engulfment and cell motility 2                                 | 1.28  | 0.033547 |
| 217882_at   | EMC3    | ER membrane protein complex subunit 3                          | -1.37 | 0.035817 |
| 204399_s_at | EML2    | echinoderm microtubule associated protein like 2               | -1.13 | 0.015206 |
| 201325_s_at | EMP1    | epithelial membrane protein 1                                  | -1.11 | 0.026671 |
| 202221_s_at | EP300   | E1A binding protein p300                                       | 1.12  | 0.043843 |
| 201719_s_at | EPB41L2 | erythrocyte membrane protein band 4.1-like 2                   | 1.08  | 0.048535 |
| 212681_at   | EPB41L3 | erythrocyte membrane protein band 4.1-like 3                   | 1.55  | 0.041385 |
| 215804_at   | EPHA1   | EPH receptor A1                                                | -1.13 | 0.019799 |
| 203464_s_at | EPN2    | epsin 2                                                        | -1.08 | 0.03605  |
| 202441_at   | ERLIN1  | ER lipid raft associated 1                                     | 1.19  | 0.037163 |
| 219905_at   | ERMAP   | erythroblast membrane-associated protein (Scianna blood group) | -1.35 | 0.000562 |
| 221200_at   | ERVK3-2 | endogenous retrovirus group K3, member 2                       | -1.08 | 0.029627 |
| 215552_s_at | ESR1    | estrogen receptor 1                                            | -1.06 | 0.048591 |
| 212630_at   | EXOC3   | exocyst complex component 3                                    | 1.09  | 0.013988 |
| 206329_at   | EXTL1   | exostoses (multiple)-like 1                                    | -1.1  | 0.040648 |
| 219429_at   | FA2H    | fatty acid 2-hydroxylase                                       | -1.07 | 0.026416 |
| 205029_s_at | FABP7   | fatty acid binding protein 7, brain                            | 1.02  | 0.040755 |
| 214890_s_at | FAM149A | family with sequence similarity 149, member A                  | -1.13 | 0.010875 |
| 203206_at   | FAM53B  | family with sequence similarity 53, member B                   | 1.21  | 0.014557 |
| 209955_s_at | FAP     | fibroblast activation protein, alpha                           | -1.11 | 0.034062 |
| 218938_at   | FBXL15  | F-box and leucine-rich repeat protein 15                       | 1.08  | 0.044017 |
| 205310_at   | FBXO46  | F-box protein 46                                               | 1.14  | 0.022156 |
| 210638_s_at | FBXO9   | F-box protein 9                                                | -1.12 | 0.049355 |
| 214571_at   | FGF3    | fibroblast growth factor 3                                     | -1.18 | 0.014523 |
| 210310_s_at | FGF5    | fibroblast growth factor 5                                     | -1.11 | 0.027117 |
| 31826_at    | FKBP15  | FK506 binding protein 15, 133kDa                               | 1.2   | 0.033404 |
| 217487_x_at | FOLH1   | folate hydrolase (prostate-specific membrane antigen) 1*       | -1.22 | 0.018167 |
| 210103_s_at | FOXA2   | forkhead box A2                                                | -1.17 | 0.028019 |
| 206307_s_at | FOXD1   | forkhead box D1                                                | 1.09  | 0.023818 |
| 206912_at   | FOXE1   | forkhead box E1 (thyroid transcription factor 2)               | -1.07 | 0.010676 |
| 221333_at   | FOXP3   | forkhead box P3                                                | -1.21 | 0.034673 |
| 213056_at   | FRMD4B  | FERM domain containing 4B                                      | -1.23 | 0.006893 |
| 210398_x_at | FUT6    | fucosyltransferase 6 (alpha (1,3) fucosyltransferase)          | -1.13 | 0.027425 |
| 217077_s_at | GABBR2  | gamma-aminobutyric acid (GABA) B receptor, 2                   | -1.11 | 0.042474 |
| 40225_at    | GAK     | cyclin G associated kinase                                     | 1.21  | 0.042031 |

|             |           |                                                                                                |       |          |
|-------------|-----------|------------------------------------------------------------------------------------------------|-------|----------|
| 205670_at   | GAL3ST1   | galactose-3-O-sulfotransferase 1                                                               | -1.1  | 0.035373 |
| 217788_s_at | GALNT2    | UDP-N-acetyl-alpha-D-galactosamine:polypeptide N-acetylgalactosaminyltransferase 2 (GalNAc-T2) | 1.14  | 0.037033 |
| 218131_s_at | GATAD2A   | GATA zinc finger domain containing 2A                                                          | 1.19  | 0.034059 |
| 205164_at   | GCAT      | glycine C-acetyltransferase                                                                    | -1.07 | 0.026413 |
| 203500_at   | GCDH      | glutaryl-CoA dehydrogenase                                                                     | 1.15  | 0.026631 |
| 211545_at   | GHRHR     | growth hormone releasing hormone receptor                                                      | -1.1  | 0.049915 |
| 207899_at   | GIP       | gastric inhibitory polypeptide                                                                 | -1.17 | 0.011989 |
| 221415_s_at | GJA9      | gap junction protein, alpha 9, 59kDa*                                                          | -1.04 | 0.047228 |
| 215243_s_at | GJB3      | gap junction protein, beta 3, 31kDa                                                            | -1.1  | 0.00971  |
| 221447_s_at | GLT8D2    | glycosyltransferase 8 domain containing 2                                                      | -1.15 | 0.035491 |
| 212737_at   | GM2A      | GM2 ganglioside activator                                                                      | 1.32  | 0.021234 |
| 222251_s_at | GMEB2     | glucocorticoid modulatory element binding protein 2                                            | 1.18  | 0.036601 |
| 201056_at   | GOLGB1    | golgin B1                                                                                      | 1.14  | 0.01177  |
| 218873_at   | GON4L     | gon-4-like (C. elegans)                                                                        | 1.24  | 0.002474 |
| 211060_x_at | GPAA1     | glycosylphosphatidylinositol anchor attachment protein 1 homolog (yeast)                       | 1.05  | 0.047441 |
| 211613_s_at | GPD2      | glycerol-3-phosphate dehydrogenase 2 (mitochondrial)                                           | -1.07 | 0.025809 |
| 214503_x_at | GPR135    | G protein-coupled receptor 135                                                                 | -1.11 | 0.043306 |
| 214018_at   | GRIP1     | glutamate receptor interacting protein 1                                                       | -1.06 | 0.030208 |
| 210939_s_at | GRM1      | glutamate receptor, metabotropic 1                                                             | -1.07 | 0.040253 |
| 216256_at   | GRM8      | glutamate receptor, metabotropic 8                                                             | -1.11 | 0.045971 |
| 220190_s_at | GTF2A1L   | general transcription factor IIA, 1-like*                                                      | -1.12 | 0.024375 |
| 215915_at   | GULP1     | GULP, engulfment adaptor PTB domain containing 1                                               | -1.09 | 0.025925 |
| 203674_at   | HELZ      | helicase with zinc finger                                                                      | 1.23  | 0.024393 |
| 203393_at   | HES1      | hairy and enhancer of split 1, (Drosophila)                                                    | -1.08 | 0.043434 |
| 206087_x_at | HFE       | hemochromatosis                                                                                | 1.08  | 0.020891 |
| 215071_s_at | HIST1H2AC | histone cluster 1, H2ac                                                                        | -1.71 | 0.036986 |
| 214455_at   | HIST1H2BC | histone cluster 1, H2bc*                                                                       | -1.43 | 0.030637 |
| 208546_x_at | HIST1H2BH | histone cluster 1, H2bh                                                                        | -1.74 | 0.044396 |
| 208496_x_at | HIST1H3A  | histone cluster 1, H3a*                                                                        | -1.25 | 0.010413 |
| 215313_x_at | HLA-A     | major histocompatibility complex, class I, A                                                   | 1.23  | 0.045172 |
| 217478_s_at | HLA-DMA   | major histocompatibility complex, class II, DM alpha                                           | 1.36  | 0.04878  |
| 205671_s_at | HLA-DOB   | major histocompatibility complex, class II, DO beta                                            | 1.43  | 0.032739 |
| 210747_at   | HLA-DQB1  | major histocompatibility complex, class II, DQ beta 1                                          | -1.11 | 0.018458 |
| 217456_x_at | HLA-E     | major histocompatibility complex, class I, E                                                   | 1.26  | 0.014691 |
| 221978_at   | HLA-F     | major histocompatibility complex, class I, F                                                   | 1.32  | 0.009504 |
| 204753_s_at | HLF       | hepatic leukemia factor                                                                        | -1.11 | 0.023729 |
| 213966_at   | HMG20B    | High mobility group 20B                                                                        | -1.09 | 0.046337 |
| 200679_x_at | HMGB1     | high mobility group box 1                                                                      | -1.21 | 0.049239 |
| 208302_at   | HMHB1     | histocompatibility (minor) HB-1                                                                | -1.07 | 0.039439 |
| 216889_s_at | HNF4A     | hepatocyte nuclear factor 4, alpha                                                             | -1.2  | 0.026615 |
| 204111_at   | HNMT      | histamine N-methyltransferase                                                                  | -1.07 | 0.015065 |

|             |         |                                                                              |       |          |
|-------------|---------|------------------------------------------------------------------------------|-------|----------|
| 221411_at   | HOXD12  | homeobox D12                                                                 | -1.09 | 0.009961 |
| 207398_at   | HOXD13  | homeobox D13                                                                 | -1.15 | 0.042948 |
| 206602_s_at | HOXD3   | homeobox D3                                                                  | -1.07 | 0.041214 |
| 203309_s_at | HPS1    | Hermansky-Pudlak syndrome 1                                                  | 1.15  | 0.03197  |
| 221122_at   | HRASLS2 | HRAS-like suppressor 2                                                       | -1.11 | 0.015657 |
| 205580_s_at | HRH1    | histamine receptor H1                                                        | -1.18 | 0.04199  |
| 214165_s_at | HS6ST1  | Heparan sulfate 6-O-sulfotransferase 1                                       | -1.14 | 0.037505 |
| 204515_at   | HSD3B1  | hydroxy-delta-5-steroid dehydrogenase, 3 beta- and steroid delta-isomerase 1 | -1.09 | 0.049596 |
| 206638_at   | HTR2B   | 5-hydroxytryptamine (serotonin) receptor 2B, G protein-coupled               | -1.07 | 0.006743 |
| 217002_s_at | HTR3A   | 5-hydroxytryptamine (serotonin) receptor 3A, ionotropic                      | -1.12 | 0.00376  |
| 202389_s_at | HTT     | huntingtin                                                                   | 1.12  | 0.036144 |
| 201611_s_at | ICMT    | isoprenylcysteine carboxyl methyltransferase                                 | 1.12  | 0.03044  |
| 211198_s_at | ICOSLG  | inducible T-cell co-stimulator ligand                                        | -1.12 | 0.037763 |
| 212221_x_at | IDS     | iduronate 2-sulfatase                                                        | 1.18  | 0.013825 |
| 205037_at   | IFT27   | intraflagellar transport 27 homolog (Chlamydomonas)                          | 1.18  | 0.039679 |
| 202718_at   | IGFBP2  | insulin-like growth factor binding protein 2, 36kDa                          | -1.23 | 0.015708 |
| 219690_at   | IGFLR1  | IGF-like family receptor 1                                                   | 1.32  | 0.006125 |
| 217217_at   | IGHA1   | immunoglobulin heavy constant alpha 1*                                       | -1.07 | 0.044824 |
| 213674_x_at | IGHD    | immunoglobulin heavy constant delta                                          | 2.3   | 0.000078 |
| 211648_at   | IGHG1   | immunoglobulin heavy constant gamma 1 (G1m marker)*                          | -1.15 | 0.022996 |
| 209374_s_at | IGHM    | immunoglobulin heavy constant mu                                             | 1.63  | 0.005332 |
| 204912_at   | IL10RA  | interleukin 10 receptor, alpha                                               | 1.21  | 0.04013  |
| 209827_s_at | IL16    | interleukin 16                                                               | 1.17  | 0.032451 |
| 215561_s_at | IL1R1   | interleukin 1 receptor, type I                                               | -1.07 | 0.030226 |
| 219971_at   | IL21R   | interleukin 21 receptor                                                      | 1.19  | 0.045679 |
| 217328_at   | IL23A   | Interleukin 23, alpha subunit p19                                            | -1.21 | 0.000123 |
| 217702_at   | IL27RA  | interleukin 27 receptor, alpha                                               | -1.2  | 0.042426 |
| 217212_s_at | IL9R    | interleukin 9 receptor                                                       | -1.14 | 0.028    |
| 48825_at    | ING4    | inhibitor of growth family, member 4                                         | 1.14  | 0.011687 |
| 212212_s_at | INTS1   | integrator complex subunit 1                                                 | 1.17  | 0.045217 |
| 211132_at   | INTS3   | integrator complex subunit 3                                                 | -1.1  | 0.016934 |
| 53968_at    | INTS5   | integrator complex subunit 5                                                 | 1.18  | 0.044952 |
| 203941_at   | INTS9   | integrator complex subunit 9                                                 | 1.15  | 0.036101 |
| 202531_at   | IRF1    | interferon regulatory factor 1                                               | 1.2   | 0.048961 |
| 202621_at   | IRF3    | interferon regulatory factor 3                                               | 1.47  | 0.019275 |
| 220225_at   | IRX4    | iroquois homeobox 4                                                          | -1.16 | 0.003539 |
| 221425_s_at | ISCA1   | iron-sulfur cluster assembly 1 homolog (S. cerevisiae)                       | -1.24 | 0.021653 |
| 208114_s_at | ISG20L2 | interferon stimulated exonuclease gene 20kDa-like 2                          | 1.16  | 0.045643 |
| 214292_at   | ITGB4   | integrin, beta 4                                                             | -1.09 | 0.038615 |
| 208083_s_at | ITGB6   | integrin, beta 6                                                             | -1.04 | 0.035138 |
| 205718_at   | ITGB7   | integrin, beta 7                                                             | 1.2   | 0.016232 |

|             |             |                                                                          |       |          |
|-------------|-------------|--------------------------------------------------------------------------|-------|----------|
| 201188_s_at | ITPR3       | inositol 1,4,5-trisphosphate receptor, type 3                            | 1.37  | 0.03371  |
| 210434_x_at | JTB         | jumping translocation breakpoint                                         | 1.09  | 0.027065 |
| 214258_x_at | KAT5        | K(lysine) acetyltransferase 5                                            | 1.14  | 0.024604 |
| 221000_s_at | KAZALD1     | Kazal-type serine peptidase inhibitor domain 1                           | -1.14 | 0.015636 |
| 221413_at   | KCNAB3      | potassium voltage-gated channel, shaker-related subfamily, beta member 3 | -1.12 | 0.042473 |
| 208477_at   | KCNC1       | potassium voltage-gated channel, Shaw-related subfamily, member 1        | -1.19 | 0.027836 |
| 205262_at   | KCNH2       | potassium voltage-gated channel, subfamily H (eag-related), member 2     | -1.17 | 0.049346 |
| 211046_at   | KCNH6       | potassium voltage-gated channel, subfamily H (eag-related), member 6     | -1.05 | 0.043365 |
| 220412_x_at | KCNK7       | potassium channel, subfamily K, member 7                                 | -1.15 | 0.03815  |
| 201643_x_at | KDM3B       | lysine (K)-specific demethylase 3B                                       | 1.2   | 0.029308 |
| 203143_s_at | KIAA0040    | KIAA0040                                                                 | 1.26  | 0.005273 |
| 212523_s_at | KIAA0146    | KIAA0146                                                                 | 1.1   | 0.029204 |
| 205496_at   | KIAA0408    | KIAA0408                                                                 | -1.04 | 0.023076 |
| 212359_s_at | KIAA0913    | KIAA0913                                                                 | 1.24  | 0.048122 |
| 215943_at   | KIAA1661    | KIAA1661 protein                                                         | -1.12 | 0.026168 |
| 218355_at   | KIF4A       | kinesin family member 4A                                                 | -1.05 | 0.029677 |
| 208961_s_at | KLF6        | Kruppel-like factor 6                                                    | 1.4   | 0.010894 |
| 210111_s_at | KLHDC10     | kelch domain containing 10                                               | 1.13  | 0.037398 |
| 221838_at   | KLHL22      | kelch-like 22 (Drosophila)                                               | 1.31  | 0.017279 |
| 220348_at   | KLHL29      | kelch-like 29 (Drosophila)                                               | -1.04 | 0.045286 |
| 204583_x_at | KLK3        | kallikrein-related peptidase 3                                           | -1.1  | 0.004082 |
| 211138_s_at | KMO         | kynurenine 3-monooxygenase (kynurenine 3-hydroxylase)                    | 1.48  | 0.014277 |
| 212101_at   | KPNA6       | karyopherin alpha 6 (importin alpha 7)*                                  | 1.21  | 0.021362 |
| 207509_s_at | LAIR2       | leukocyte-associated immunoglobulin-like receptor 2                      | 1.34  | 0.038649 |
| 217173_s_at | LDLR        | low density lipoprotein receptor                                         | -1.06 | 0.045027 |
| 204854_at   | LEPREL2     | leprecan-like 2                                                          | -1.14 | 0.049814 |
| 212327_at   | LIMCH1      | LIM and calponin homology domains 1                                      | -1.09 | 0.013617 |
| 219760_at   | LIN7B       | lin-7 homolog B (C. elegans)                                             | -1.12 | 0.015316 |
| 215110_at   | LOC10028897 | BMS1 homolog, ribosome assembly protein (yeast)                          | -1.09 | 0.044919 |
| 212859_x_at | LOC10050558 | pseudogene*<br>metallothionein-2-like*                                   | 1.12  | 0.040994 |
| 214857_at   | LOC10050576 | uncharacterized LOC10050576                                              | -1.22 | 0.025157 |
| 221247_s_at | LOC653375   | RCC1-like G exchanging factor-like*                                      | 1.1   | 0.049757 |
| 216666_at   | LOC93432    | maltase-glucoamylase (alpha-glucosidase) pseudogene                      | -1.16 | 0.005478 |
| 220798_x_at | LPPR3       | lipid phosphate phosphatase-related protein type 3                       | -1.17 | 0.036993 |
| 213496_at   | LPPR4       | lipid phosphate phosphatase-related protein type 4                       | 1.08  | 0.028063 |
| 221017_s_at | LRRC3       | leucine rich repeat containing 3                                         | -1.15 | 0.045531 |
| 212904_at   | LRRC47      | leucine rich repeat containing 47                                        | 1.22  | 0.021248 |
| 204682_at   | LTBP2       | latent transforming growth factor beta binding protein 2                 | -1.18 | 0.037645 |

|             |                |                                                                            |       |          |
|-------------|----------------|----------------------------------------------------------------------------|-------|----------|
| 210437_at   | MAGEA9         | melanoma antigen family A, 9*                                              | -1.08 | 0.037905 |
| 217920_at   | MAN1A2         | mannosidase, alpha, class 1A, member 2                                     | -1.11 | 0.02788  |
| 211083_s_at | MAP3K13        | mitogen-activated protein kinase kinase kinase 13                          | -1.05 | 0.048247 |
| 214219_x_at | MAP4K1         | mitogen-activated protein kinase kinase kinase kinase 1                    | 1.29  | 0.046927 |
| 215471_s_at | MAP7           | microtubule-associated protein 7                                           | -1.09 | 0.024975 |
| 212497_at   | MAPK1IP1L      | mitogen-activated protein kinase 1 interacting protein 1-like              | -1.23 | 0.042471 |
| 40016_g_at  | MAST4          | microtubule associated serine/threonine kinase family member 4             | 1.29  | 0.044952 |
| 200768_s_at | MAT2A          | methionine adenosyltransferase II, alpha                                   | 1.37  | 0.032573 |
| 211042_x_at | MCAM           | melanoma cell adhesion molecule                                            | 1.09  | 0.023681 |
| 210983_s_at | MCM7           | minichromosome maintenance complex component 7                             | 1.22  | 0.038129 |
| 213043_s_at | MED24          | mediator complex subunit 24                                                | 1.17  | 0.037828 |
| 208262_x_at | MEFV           | Mediterranean fever                                                        | -1.17 | 0.008804 |
| 214077_x_at | MEIS3P1        | Meis homeobox 3 pseudogene 1                                               | -1.11 | 0.030923 |
| 221150_at   | MEPE           | matrix extracellular phosphoglycoprotein                                   | -1.11 | 0.048749 |
| 212945_s_at | MGA            | MAX gene associated                                                        | 1.2   | 0.049184 |
| 220698_at   | MGC4294        | uncharacterized MGC4294                                                    | -1.16 | 0.01704  |
| 55081_at    | MICALL1        | MICAL-like 1                                                               | 1.18  | 0.025707 |
| 219332_at   | MICALL2        | MICAL-like 2                                                               | -1.12 | 0.03484  |
| 213166_x_at | MIR4784        | microRNA 4784*                                                             | 1.39  | 0.038104 |
| 212346_s_at | MIR4800        | microRNA 4800*                                                             | 1.15  | 0.017067 |
| 212080_at   | MLL            | myeloid/lymphoid or mixed-lineage leukemia (trithorax homolog, Drosophila) | 1.21  | 0.035492 |
| 203644_s_at | MON1B          | MON1 homolog B (yeast)                                                     | 1.19  | 0.024257 |
| 205123_s_at | MSANTD3-TMEFF1 | MSANTD3-TMEFF1 readthrough*                                                | -1.11 | 0.043924 |
| 210297_s_at | MSMB           | microseminoprotein, beta-                                                  | -1.07 | 0.009422 |
| 205555_s_at | MSX2           | msh homeobox 2                                                             | -1.07 | 0.048803 |
| 204871_at   | MTERF          | mitochondrial transcription termination factor                             | -1.11 | 0.009949 |
| 205323_s_at | MTF1           | metal-regulatory transcription factor 1                                    | 1.22  | 0.030284 |
| 203208_s_at | MTFR1          | mitochondrial fission regulator 1                                          | 1.1   | 0.039388 |
| 212767_at   | MTG1           | mitochondrial GTPase 1 homolog (S. cerevisiae)                             | 1.18  | 0.014933 |
| 222143_s_at | MTMR14         | myotubularin related protein 14                                            | 1.18  | 0.043198 |
| 217295_at   | MUC8           | mucin 8                                                                    | -1.08 | 0.022792 |
| 207727_s_at | MUTYH          | mutY homolog (E. coli)                                                     | 1.13  | 0.008748 |
| 206372_at   | MYF6           | myogenic factor 6 (herculin)                                               | -1.09 | 0.019452 |
| 201495_x_at | MYH11          | myosin, heavy chain 11, smooth muscle                                      | -1.1  | 0.041454 |
| 208208_at   | MYH13          | myosin, heavy chain 13, skeletal muscle                                    | -1.11 | 0.028126 |
| 212338_at   | MYO1D          | myosin ID                                                                  | -1.05 | 0.049093 |
| 45526_g_at  | NAA60          | N(alpha)-acetyltransferase 60, NatF catalytic subunit                      | 1.23  | 0.006382 |
| 222161_at   | NAALAD2        | N-acetylated alpha-linked acidic dipeptidase 2                             | -1.06 | 0.021119 |
| 210048_at   | NAPG           | N-ethylmaleimide-sensitive factor attachment protein, gamma                | -1.25 | 0.002205 |
| 212443_at   | NBEAL2         | neurobeachin-like 2                                                        | 1.29  | 0.03701  |

|             |        |                                                                                                |       |          |
|-------------|--------|------------------------------------------------------------------------------------------------|-------|----------|
| 217359_s_at | NCAM1  | neural cell adhesion molecule 1                                                                | -1.14 | 0.029052 |
| 208979_at   | NCOA6  | nuclear receptor coactivator 6                                                                 | 1.11  | 0.048683 |
| 200854_at   | NCOR1  | nuclear receptor corepressor 1                                                                 | 1.13  | 0.040938 |
| 207760_s_at | NCOR2  | nuclear receptor corepressor 2                                                                 | 1.34  | 0.038536 |
| 206022_at   | NDP    | Norrie disease (pseudoglioma)                                                                  | -1.06 | 0.046866 |
| 209159_s_at | NDRG4  | NDRG family member 4                                                                           | -1.1  | 0.02286  |
| 209223_at   | NDUFA2 | NADH dehydrogenase (ubiquinone) 1 alpha subcomplex, 2, 8kDa                                    | -1.09 | 0.049025 |
| 201227_s_at | NDUFB8 | NADH dehydrogenase (ubiquinone) 1 beta subcomplex, 8, 19kDa                                    | 1.18  | 0.025974 |
| 213012_at   | NEDD4  | neural precursor cell expressed, developmentally down-regulated 4, E3 ubiquitin protein ligase | -1.16 | 0.005414 |
| 214062_x_at | NFKBIB | nuclear factor of kappa light polypeptide gene enhancer in B-cells inhibitor, beta             | 1.17  | 0.038802 |
| 202215_s_at | NFYC   | nuclear transcription factor Y, gamma                                                          | 1.27  | 0.009526 |
| 205204_at   | NMB    | neuromedin B                                                                                   | -1.12 | 0.043708 |
| 206023_at   | NMU    | neuromedin U                                                                                   | -1.07 | 0.047952 |
| 216344_at   | NPHP4  | nephronophthisis 4                                                                             | -1.11 | 0.047578 |
| 207640_x_at | NTN3   | netrin 3                                                                                       | -1.14 | 0.034913 |
| 200747_s_at | NUMA1  | nuclear mitotic apparatus protein 1                                                            | 1.27  | 0.049579 |
| 217601_at   | NUP188 | nucleoporin 188kDa                                                                             | -1.11 | 0.028702 |
| 207740_s_at | NUP62  | nucleoporin 62kDa                                                                              | 1.39  | 0.012216 |
| 213863_s_at | OAZ3   | ornithine decarboxylase antizyme 3                                                             | -1.12 | 0.04579  |
| 202841_x_at | OGFR   | opioid growth factor receptor                                                                  | 1.06  | 0.041536 |
| 222025_s_at | OPLAH  | 5-oxoprolinase (ATP-hydrolysing)                                                               | -1.11 | 0.043079 |
| 219032_x_at | OPN3   | opsin 3                                                                                        | 1.28  | 0.03114  |
| 207553_at   | OPRK1  | opioid receptor, kappa 1                                                                       | -1.02 | 0.031662 |
| 221424_s_at | OR51E2 | olfactory receptor, family 51, subfamily E, member 2                                           | -1.1  | 0.028253 |
| 200714_x_at | OS9    | osteosarcoma amplified 9, endoplasmic reticulum lectin                                         | 1.18  | 0.03997  |
| 220492_s_at | OTOF   | otoferlin                                                                                      | -1.07 | 0.029609 |
| 221356_x_at | P2RX2  | purinergic receptor P2X, ligand-gated ion channel, 2                                           | -1.12 | 0.0111   |
| 220779_at   | PADI3  | peptidyl arginine deiminase, type III                                                          | -1.16 | 0.012627 |
| 211413_s_at | PADI4  | peptidyl arginine deiminase, type IV                                                           | -1.3  | 0.044449 |
| 200906_s_at | PALLD  | palladin, cytoskeletal associated protein                                                      | -1.09 | 0.022499 |
| 50400_at    | PAOX   | polyamine oxidase (exo-N4-amino)                                                               | 1.1   | 0.043179 |
| 206229_x_at | PAX2   | paired box 2                                                                                   | -1.11 | 0.038741 |
| 221990_at   | PAX8   | paired box 8                                                                                   | -1.1  | 0.022278 |
| 204564_at   | PCGF3  | polycomb group ring finger 3                                                                   | -1.15 | 0.002028 |
| 203118_at   | PCSK7  | proprotein convertase subtilisin/kexin type 7                                                  | 1.17  | 0.007751 |
| 222152_at   | PDCD6  | Programmed cell death 6                                                                        | 1.09  | 0.022269 |
| 204448_s_at | PDCL   | phosducin-like                                                                                 | -1.15 | 0.022174 |
| 206388_at   | PDE3A  | phosphodiesterase 3A, cGMP-inhibited                                                           | -1.15 | 0.033055 |
| 215671_at   | PDE4B  | phosphodiesterase 4B, cAMP-specific                                                            | 1.14  | 0.026621 |
| 211093_at   | PDE6C  | phosphodiesterase 6C, cGMP-specific, cone, alpha prime                                         | 1.03  | 0.035171 |

|             |          |                                                             |       |          |
|-------------|----------|-------------------------------------------------------------|-------|----------|
| 218718_at   | PDGFC    | platelet derived growth factor C                            | -1.65 | 0.021985 |
| 218019_s_at | PDXXK    | pyridoxal (pyridoxine, vitamin B6) kinase                   | 1.28  | 0.01179  |
| 209493_at   | PDZD2    | PDZ domain containing 2                                     | 1.08  | 0.003498 |
| 217923_at   | PEF1     | penta-EF-hand domain containing 1                           | 1.22  | 0.023242 |
| 213302_at   | PFAS     | phosphoribosylformylglycinamide synthase                    | 1.08  | 0.034692 |
| 217009_at   | PGK2     | phosphoglycerate kinase 2                                   | -1.14 | 0.001802 |
| 212916_at   | PHF8     | PHD finger protein 8                                        | 1.16  | 0.044179 |
| 201397_at   | PHGDH    | phosphoglycerate dehydrogenase                              | -1.18 | 0.024048 |
| 207312_at   | PHKG1    | phosphorylase kinase, gamma 1 (muscle)                      | -1.14 | 0.028091 |
| 206138_s_at | PI4KB    | phosphatidylinositol 4-kinase, catalytic, beta              | 1.23  | 0.002387 |
| 220954_s_at | PILRB    | paired immunoglobulin-like type 2 receptor beta             | 1.25  | 0.042572 |
| 201927_s_at | PKP4     | plakophilin 4                                               | -1.12 | 0.002878 |
| 215938_s_at | PLA2G6   | phospholipase A2, group VI (cytosolic, calcium-independent) | 1.25  | 0.03523  |
| 210194_at   | PLA2R1   | phospholipase A2 receptor 1, 180kDa                         | -1.05 | 0.049152 |
| 207002_s_at | PLAGL1   | pleiomorphic adenoma gene-like 1                            | 1.27  | 0.0114   |
| 204613_at   | PLCG2    | phospholipase C, gamma 2 (phosphatidylinositol-specific)    | 1.22  | 0.042263 |
| 217488_x_at | PMS2P3   | postmeiotic segregation increased 2 pseudogene 3            | -1.09 | 0.046014 |
| 202996_at   | POLD4    | polymerase (DNA-directed), delta 4, accessory subunit       | 1.13  | 0.008284 |
| 219066_at   | PPCDC    | phosphopantothenoylcysteine decarboxylase                   | 1.15  | 0.019757 |
| 206547_s_at | PPEF1    | protein phosphatase, EF-hand calcium binding domain 1       | -1.14 | 0.043649 |
| 203407_at   | PPL      | periplakin                                                  | -1.07 | 0.031008 |
| 37028_at    | PPP1R15A | protein phosphatase 1, regulatory subunit 15A               | 1.63  | 0.033035 |
| 208932_at   | PPP4C    | protein phosphatase 4, catalytic subunit                    | 1.31  | 0.011052 |
| 215705_at   | PPP5C    | protein phosphatase 5, catalytic subunit                    | -1.12 | 0.045951 |
| 202791_s_at | PPP6R2   | protein phosphatase 6, regulatory subunit 2                 | 1.14  | 0.010863 |
| 209282_at   | PRKD2    | protein kinase D2                                           | 1.19  | 0.047817 |
| 216696_s_at | PRODH2   | proline dehydrogenase (oxidase) 2                           | -1.11 | 0.018714 |
| 216519_s_at | PROSC    | proline synthetase co-transcribed homolog (bacterial)       | -1.08 | 0.037476 |
| 208880_s_at | PRPF6    | PRP6 pre-mRNA processing factor 6 homolog (S. cerevisiae)   | 1.2   | 0.020794 |
| 213847_at   | PRPH     | peripherin                                                  | -1.14 | 0.038084 |
| 220014_at   | PRR16    | proline rich 16                                             | 1.09  | 0.018601 |
| 205402_x_at | PRSS2    | protease, serine, 2 (trypsin 2)                             | -1.17 | 0.006865 |
| 212806_at   | PRUNE2   | prune homolog 2 (Drosophila)                                | -1.09 | 0.03647  |
| 205319_at   | PSCA     | prostate stem cell antigen                                  | -1.15 | 0.024194 |
| 211270_x_at | PTBP1    | polypyrimidine tract binding protein 1                      | 1.12  | 0.039576 |
| 214391_x_at | PTGER1   | prostaglandin E receptor 1 (subtype EP1), 42kDa             | -1.08 | 0.042302 |
| 203110_at   | PTK2B    | PTK2B protein tyrosine kinase 2 beta                        | 1.45  | 0.020221 |
| 216915_s_at | PTPN12   | protein tyrosine phosphatase, non-receptor type 12          | -1.61 | 0.045535 |
| 215172_at   | PTPN20A  | protein tyrosine phosphatase, non-receptor type 20A*        | -1.05 | 0.033535 |
| 206687_s_at | PTPN6    | protein tyrosine phosphatase, non-receptor type 6           | 1.14  | 0.040602 |

|             |         |                                                                                         |       |          |
|-------------|---------|-----------------------------------------------------------------------------------------|-------|----------|
| 213799_s_at | PTPRA   | protein tyrosine phosphatase, receptor type, A                                          | -1.06 | 0.042442 |
| 205846_at   | PTPRB   | protein tyrosine phosphatase, receptor type, B                                          | -1.12 | 0.017948 |
| 200635_s_at | PTPRF   | protein tyrosine phosphatase, receptor type, F                                          | -1.1  | 0.044636 |
| 208300_at   | PTPRH   | protein tyrosine phosphatase, receptor type, H                                          | -1.06 | 0.048679 |
| 208121_s_at | PTPRO   | protein tyrosine phosphatase, receptor type, O                                          | 1.26  | 0.02213  |
| 210675_s_at | PTPRR   | protein tyrosine phosphatase, receptor type, R                                          | -1.05 | 0.048043 |
| 214443_at   | PVR     | poliovirus receptor                                                                     | -1.16 | 0.031949 |
| 212263_at   | QKI     | QKI, KH domain containing, RNA binding                                                  | 1.62  | 0.012186 |
| 74694_s_at  | RABEP2  | rabaptin, RAB GTPase binding effector protein 2                                         | 1.25  | 0.040344 |
| 213313_at   | RABGAP1 | RAB GTPase activating protein 1                                                         | 1.13  | 0.04469  |
| 220500_s_at | RABL2A  | RAB, member of RAS oncogene family-like 2A*                                             | 1.15  | 0.01376  |
| 213603_s_at | RAC2    | ras-related C3 botulinum toxin substrate 2 (rho family, small GTP binding protein Rac2) | 1.1   | 0.047783 |
| 204558_at   | RAD54L  | RAD54-like (S. cerevisiae)                                                              | -1.15 | 0.028583 |
| 213205_s_at | RAD54L2 | RAD54-like 2 (S. cerevisiae)                                                            | 1.18  | 0.040123 |
| 212707_s_at | RASA4   | RAS p21 protein activator 4*                                                            | 1.31  | 0.046441 |
| 221440_s_at | RBBP9   | retinoblastoma binding protein 9                                                        | -1.11 | 0.044196 |
| 221217_s_at | RBFOX1  | RNA binding protein, fox-1 homolog (C. elegans) 1                                       | -1.07 | 0.020293 |
| 207207_at   | RBMXL2  | RNA binding motif protein, X-linked-like 2                                              | -1.05 | 0.040439 |
| 204128_s_at | RFC3    | replication factor C (activator 1) 3, 38kDa                                             | -1.24 | 0.024058 |
| 207234_at   | RFX3    | regulatory factor X, 3 (influences HLA class II expression)                             | 1.06  | 0.010213 |
| 206146_s_at | RHAG    | Rh-associated glycoprotein                                                              | -1.13 | 0.037166 |
| 219202_at   | RHBDF2  | rhomboid 5 homolog 2 (Drosophila)                                                       | 1.19  | 0.018231 |
| 216048_s_at | RHOBTB3 | Rho-related BTB domain containing 3                                                     | -1.11 | 0.029971 |
| 219446_at   | RIC8B   | resistance to inhibitors of cholinesterase 8 homolog B (C. elegans)                     | -1.24 | 0.015703 |
| 206137_at   | RIMS2   | regulating synaptic membrane exocytosis 2                                               | -1.1  | 0.007445 |
| 217984_at   | RNASET2 | ribonuclease T2                                                                         | 1.13  | 0.043953 |
| 219988_s_at | RNF220  | ring finger protein 220                                                                 | 1.06  | 0.04261  |
| 212790_x_at | RPL13A  | ribosomal protein L13a*                                                                 | 1.06  | 0.0417   |
| 219762_s_at | RPL36   | ribosomal protein L36                                                                   | 1.36  | 0.016918 |
| 210115_at   | RPL39L  | ribosomal protein L39-like                                                              | -1.16 | 0.029801 |
| 200909_s_at | RPLP2   | ribosomal protein, large, P2*                                                           | 1.11  | 0.008838 |
| 212553_at   | RPRD2   | regulation of nuclear pre-mRNA domain containing 2                                      | 1.15  | 0.036945 |
| 213414_s_at | RPS19   | ribosomal protein S19                                                                   | 1.09  | 0.046405 |
| 208904_s_at | RPS28   | ribosomal protein S28                                                                   | 1.07  | 0.033354 |
| 213481_at   | S100A13 | S100 calcium binding protein A13                                                        | -1.08 | 0.047298 |
| 211322_s_at | SARDH   | sarcosine dehydrogenase                                                                 | -1.26 | 0.008405 |
| 200802_at   | SARS    | seryl-tRNA synthetase                                                                   | 1.11  | 0.034117 |
| 213236_at   | SASH1   | SAM and SH3 domain containing 1                                                         | 1.53  | 0.04585  |
| 218206_x_at | SCAND1  | SCAN domain containing 1                                                                | 1.29  | 0.029022 |
| 212158_at   | SDC2    | syndecan 2                                                                              | -1.09 | 0.026867 |
| 221972_s_at | SDF4    | stromal cell derived factor 4                                                           | 1.55  | 0.023438 |



|             |           |                                                                                                   |       |          |
|-------------|-----------|---------------------------------------------------------------------------------------------------|-------|----------|
| 218711_s_at | SDPR      | serum deprivation response                                                                        | -1.65 | 0.047629 |
| 202361_at   | SEC24C    | SEC24 family, member C ( <i>S. cerevisiae</i> )                                                   | 1.3   | 0.038193 |
| 209879_at   | SELPLG    | selectin P ligand                                                                                 | 1.2   | 0.0376   |
| 211362_s_at | SERPINB13 | serpin peptidase inhibitor, clade B (ovalbumin), member 13                                        | -1.12 | 0.022658 |
| 205933_at   | SETBP1    | SET binding protein 1                                                                             | 1.23  | 0.014508 |
| 200687_s_at | SF3B3     | splicing factor 3b, subunit 3, 130kDa                                                             | 1.09  | 0.019563 |
| 217226_s_at | SFXN3     | sideroflexin 3                                                                                    | 1.11  | 0.025683 |
| 204979_s_at | SH3BGR    | SH3 domain binding glutamic acid-rich protein                                                     | -1.16 | 0.007956 |
| 220563_s_at | SHANK1    | SH3 and multiple ankyrin repeat domains 1                                                         | -1.14 | 0.020941 |
| 214096_s_at | SHMT2     | serine hydroxymethyltransferase 2 (mitochondrial)                                                 | 1.25  | 0.016063 |
| 210134_x_at | SHOX2     | short stature homeobox 2                                                                          | -1.17 | 0.01048  |
| 218921_at   | SIGIRR    | single immunoglobulin and toll-interleukin 1 receptor (TIR) domain                                | 1.29  | 0.022474 |
| 204164_at   | SIPA1     | signal-induced proliferation-associated 1                                                         | 1.29  | 0.009453 |
| 213600_at   | SIPA1L3   | signal-induced proliferation-associated 1 like 3                                                  | 1.23  | 0.012794 |
| 203727_at   | SKIV2L    | superkiller viralicidic activity 2-like ( <i>S. cerevisiae</i> )                                  | 1.17  | 0.014597 |
| 211112_at   | SLC12A4   | solute carrier family 12 (potassium/chloride transporters), member 4                              | -1.15 | 0.007413 |
| 207074_s_at | SLC18A1   | solute carrier family 18 (vesicular monoamine), member 1                                          | -1.12 | 0.041808 |
| 219795_at   | SLC6A14   | solute carrier family 6 (amino acid transporter), member 14                                       | -1.08 | 0.021609 |
| 201349_at   | SLC9A3R1  | solute carrier family 9, subfamily A (NHE3, cation proton antiporter 3), member 3 regulator 1     | 1.14  | 0.049577 |
| 212947_at   | SLC9A8    | solute carrier family 9, subfamily A (NHE8, cation proton antiporter 8), member 8                 | 1.23  | 0.033315 |
| 206354_at   | SLCO1B3   | solute carrier organic anion transporter family, member 1B3                                       | -1.05 | 0.037327 |
| 212258_s_at | SMARCA2   | SWI/SNF related, matrix associated, actin dependent regulator of chromatin, subfamily a, member 2 | -1.14 | 0.048716 |
| 212167_s_at | SMARCB1   | SWI/SNF related, matrix associated, actin dependent regulator of chromatin, subfamily b, member 1 | 1.14  | 0.028131 |
| 201321_s_at | SMARCC2   | SWI/SNF related, matrix associated, actin dependent regulator of chromatin, subfamily c, member 2 | 1.64  | 0.033009 |
| 201827_at   | SMARCD2   | SWI/SNF related, matrix associated, actin dependent regulator of chromatin, subfamily d, member 2 | 1.11  | 0.034946 |
| 208584_at   | SNCG      | synuclein, gamma (breast cancer-specific protein 1)                                               | -1.11 | 0.009374 |
| 204288_s_at | SORBS2    | sorbin and SH3 domain containing 2                                                                | -1.09 | 0.038123 |
| 209762_x_at | SP110     | SP110 nuclear body protein                                                                        | 1.14  | 0.040335 |
| 216972_at   | SPAM1     | sperm adhesion molecule 1 (PH-20 hyaluronidase, zona pellucida binding)                           | -1.06 | 0.044527 |
| 212480_at   | SPECC1L   | sperm antigen with calponin homology and coiled-coil domains 1-like                               | 1.17  | 0.002171 |
| 40273_at    | SPHK2     | sphingosine kinase 2                                                                              | 1.12  | 0.045658 |
| 205861_at   | SPIB      | Spi-B transcription factor (Spi-1/PU.1 related)                                                   | 1.48  | 0.001683 |
| 208611_s_at | SPTAN1    | spectrin, alpha, non-erythrocytic 1                                                               | 1.2   | 0.04472  |
| 214145_s_at | SPTB      | spectrin, beta, erythrocytic                                                                      | -1.09 | 0.03294  |
| 213562_s_at | SQLE      | squalene epoxidase                                                                                | -1.07 | 0.020398 |

|             |         |                                                                                                      |       |          |
|-------------|---------|------------------------------------------------------------------------------------------------------|-------|----------|
| 204675_at   | SRD5A1  | steroid-5-alpha-reductase, alpha polypeptide 1 (3-oxo-5 alpha-steroid delta 4-dehydrogenase alpha 1) | 1.2   | 0.037698 |
| 202817_s_at | SS18    | synovial sarcoma translocation, chromosome 18                                                        | 1.54  | 0.038658 |
| 221752_at   | SSH1    | slingshot homolog 1 (Drosophila)                                                                     | 1.2   | 0.035265 |
| 204596_s_at | STC1    | stanniocalcin 1                                                                                      | -1.09 | 0.025824 |
| 203439_s_at | STC2    | stanniocalcin 2                                                                                      | -1.12 | 0.030875 |
| 40420_at    | STK10   | serine/threonine kinase 10                                                                           | 1.25  | 0.013845 |
| 217934_x_at | STUB1   | STIP1 homology and U-box containing protein 1, E3 ubiquitin protein ligase                           | 1.11  | 0.041763 |
| 207346_at   | STX2    | syntaxin 2                                                                                           | -1.14 | 0.006375 |
| 213505_s_at | SUGP2   | SURP and G patch domain containing 2                                                                 | 1.12  | 0.032625 |
| 212344_at   | SULF1   | sulfatase 1                                                                                          | -1.14 | 0.044144 |
| 209307_at   | SWAP70  | SWAP switching B-cell complex 70kDa subunit                                                          | 1.66  | 0.048848 |
| 207540_s_at | SYK     | spleen tyrosine kinase                                                                               | 1.19  | 0.009162 |
| 221914_at   | SYN1    | synapsin I                                                                                           | -1.08 | 0.041187 |
| 213200_at   | SYN1    | synaptophysin                                                                                        | -1.18 | 0.015208 |
| 217437_s_at | TACC1   | transforming, acidic coiled-coil containing protein 1                                                | 1.18  | 0.031063 |
| 218308_at   | TACC3   | transforming, acidic coiled-coil containing protein 3                                                | 1.18  | 0.038762 |
| 205966_at   | TAF13   | TAF13 RNA polymerase II, TATA box binding protein (TBP)-associated factor, 18kDa                     | -1.06 | 0.026231 |
| 221324_at   | TAS2R1  | taste receptor, type 2, member 1                                                                     | -1.11 | 0.036522 |
| 212350_at   | TBC1D1  | TBC1 (tre-2/USP6, BUB2, cdc16) domain family, member 1                                               | 1.18  | 0.035543 |
| 201814_at   | TBC1D5  | TBC1 domain family, member 5                                                                         | 1.17  | 0.03546  |
| 211052_s_at | TBCD    | tubulin folding cofactor D                                                                           | 1.31  | 0.006623 |
| 204931_at   | TCF21   | transcription factor 21                                                                              | -1.08 | 0.01558  |
| 222146_s_at | TCF4    | transcription factor 4                                                                               | 1.34  | 0.049708 |
| 209995_s_at | TCL1A   | T-cell leukemia/lymphoma 1A                                                                          | 2.16  | 0.016979 |
| 206438_x_at | TCTN2   | tectonic family member 2                                                                             | -1.23 | 0.016914 |
| 34260_at    | TELO2   | TEL2, telomere maintenance 2, homolog (S. cerevisiae)                                                | 1.1   | 0.039517 |
| 214064_at   | TF      | transferrin                                                                                          | -1.09 | 0.042101 |
| 50221_at    | TFEB    | transcription factor EB                                                                              | 1.17  | 0.029798 |
| 207334_s_at | TGFBR2  | transforming growth factor, beta receptor II (70/80kDa)                                              | -1.19 | 0.045194 |
| 212040_at   | TGOLN2  | trans-golgi network protein 2                                                                        | 1.42  | 0.031182 |
| 218492_s_at | THAP7   | THAP domain containing 7                                                                             | 1.26  | 0.024907 |
| 208850_s_at | THY1    | Thy-1 cell surface antigen                                                                           | -1.05 | 0.034518 |
| 201822_at   | TIMM17A | translocase of inner mitochondrial membrane 17 homolog A (yeast)                                     | -1.09 | 0.039332 |
| 220052_s_at | TINF2   | TERF1 (TRF1)-interacting nuclear factor 2                                                            | 1.25  | 0.003055 |
| 214183_s_at | TKTL1   | transketolase-like 1                                                                                 | -1.49 | 0.019995 |
| 212770_at   | TLE3    | transducin-like enhancer of split 3 (E(sp1) homolog, Drosophila)                                     | 1.19  | 0.037422 |
| 215008_at   | TLL2    | tolloid-like 2                                                                                       | -1.06 | 0.030291 |
| 210166_at   | TLR5    | toll-like receptor 5                                                                                 | 1.31  | 0.038007 |

|             |          |                                                                    |       |          |
|-------------|----------|--------------------------------------------------------------------|-------|----------|
| 213349_at   | TMCC1    | transmembrane and coiled-coil domain family 1                      | 1.22  | 0.00077  |
| 219460_s_at | TMEM127  | transmembrane protein 127                                          | 1.11  | 0.02347  |
| 218531_at   | TMEM134  | transmembrane protein 134                                          | 1.21  | 0.02594  |
| 218113_at   | TMEM2    | transmembrane protein 2                                            | 1.2   | 0.011507 |
| 222267_at   | TMEM209  | transmembrane protein 209                                          | -1.18 | 0.032749 |
| 217899_at   | TMEM214  | transmembrane protein 214                                          | 1.17  | 0.02871  |
| 219449_s_at | TMEM70   | transmembrane protein 70                                           | -1.7  | 0.018675 |
| 221032_s_at | TMPRSS5  | transmembrane protease, serine 5                                   | -1.07 | 0.02383  |
| 207113_s_at | TNF      | tumor necrosis factor                                              | 2.86  | 0.044506 |
| 214581_x_at | TNFRSF21 | tumor necrosis factor receptor superfamily, member 21              | -1.07 | 0.030206 |
| 48531_at    | TNIP2    | TNFAIP3 interacting protein 2                                      | 1.12  | 0.042731 |
| 217121_at   | TNKS     | tankyrase, TRF1-interacting ankyrin-related ADP-ribose polymerase  | -1.12 | 0.033102 |
| 209904_at   | TNNC1    | troponin C type 1 (slow)                                           | -1.08 | 0.036499 |
| 204485_s_at | TOM1L1   | target of myb1 (chicken)-like 1                                    | -1.05 | 0.02927  |
| 203050_at   | TP53BP1  | tumor protein p53 binding protein 1                                | 1.13  | 0.049225 |
| 211834_s_at | TP63     | tumor protein p63                                                  | -1.1  | 0.027354 |
| 214924_s_at | TRAK1    | trafficking protein, kinesin binding 1                             | 1.26  | 0.042882 |
| 213261_at   | TRANK1   | tetratricopeptide repeat and ankyrin repeat containing 1           | 1.1   | 0.024779 |
| 210994_x_at | TRIM23   | tripartite motif containing 23                                     | -1.37 | 0.042412 |
| 210463_x_at | TRMT1    | tRNA methyltransferase 1 homolog ( <i>S. cerevisiae</i> )          | 1.12  | 0.03734  |
| 205028_at   | TRO      | trophinin                                                          | -1.07 | 0.049836 |
| 220226_at   | TRPM8    | transient receptor potential cation channel, subfamily M, member 8 | -1.19 | 0.047132 |
| 219415_at   | TTYH1    | tweety homolog 1 ( <i>Drosophila</i> )                             | -1.13 | 0.037582 |
| 218184_at   | TULP4    | tubby like protein 4                                               | 1.13  | 0.03276  |
| 209078_s_at | TXN2     | thioredoxin 2                                                      | 1.22  | 0.016845 |
| 218347_at   | TYW1     | tRNA-yW synthesizing protein 1 homolog ( <i>S. cerevisiae</i> )*   | 1.13  | 0.025266 |
| 218381_s_at | U2AF2    | U2 small nuclear RNA auxiliary factor 2                            | 1.08  | 0.04085  |
| 200964_at   | UBA1     | ubiquitin-like modifier activating enzyme 1                        | 1.3   | 0.020264 |
| 211950_at   | UBR4     | ubiquitin protein ligase E3 component n-recogin 4                  | 1.2   | 0.027953 |
| 219172_at   | UBTD1    | ubiquitin domain containing 1                                      | -1.12 | 0.030188 |
| 201871_s_at | UBXN1    | UBX domain protein 1                                               | 1.19  | 0.03571  |
| 218533_s_at | UCKL1    | uridine-cytidine kinase 1-like 1                                   | 1.22  | 0.004417 |
| 215125_s_at | UGT1A1   | UDP glucuronosyltransferase 1 family, polypeptide A1*              | -1.08 | 0.031826 |
| 206716_at   | UMOD     | uromodulin                                                         | -1.1  | 0.018271 |
| 211168_s_at | UPF1     | UPF1 regulator of nonsense transcripts homolog (yeast)             | 1.21  | 0.018325 |
| 206658_at   | UPK3B    | uroplakin 3B                                                       | -1.14 | 0.018629 |
| 208723_at   | USP11    | ubiquitin specific peptidase 11                                    | 1.25  | 0.022187 |
| 205356_at   | USP13    | ubiquitin specific peptidase 13 (isopeptidase T-3)                 | 1.12  | 0.047359 |
| 217441_at   | USP33    | ubiquitin specific peptidase 33                                    | -1.09 | 0.03309  |

|             |         |                                                                |       |          |
|-------------|---------|----------------------------------------------------------------|-------|----------|
| 221098_x_at | UTP14A  | UTP14, U3 small nucleolar ribonucleoprotein, homolog A (yeast) | 1.06  | 0.026733 |
| 220068_at   | VPREB3  | pre-B lymphocyte 3                                             | 1.56  | 0.006654 |
| 212326_at   | VPS13D  | vacuolar protein sorting 13 homolog D ( <i>S. cerevisiae</i> ) | 1.18  | 0.035688 |
| 221704_s_at | VPS37B  | vacuolar protein sorting 37 homolog B ( <i>S. cerevisiae</i> ) | 1.18  | 0.028026 |
| 202261_at   | VPS72   | vacuolar protein sorting 72 homolog ( <i>S. cerevisiae</i> )   | 1.21  | 0.042257 |
| 218022_at   | VRK3    | vaccinia related kinase 3                                      | 1.2   | 0.002414 |
| 211383_s_at | WDR37   | WD repeat domain 37                                            | 1.18  | 0.049148 |
| 219809_at   | WDR55   | WD repeat domain 55                                            | 1.21  | 0.030831 |
| 215711_s_at | WEE1    | WEE1 homolog ( <i>S. pombe</i> )                               | -1.14 | 0.038065 |
| 211982_x_at | XPO6    | exportin 6                                                     | 1.18  | 0.045591 |
| 217065_at   | YME1L1  | YME1-like 1 ( <i>S. cerevisiae</i> )                           | -1.12 | 0.018968 |
| 201369_s_at | ZFP36L2 | zinc finger protein 36, C3H type-like 2                        | 1.64  | 0.019148 |
| 203556_at   | ZHX2    | zinc fingers and homeoboxes 2                                  | 1.22  | 0.032428 |
| 214670_at   | ZKSCAN1 | zinc finger with KRAB and SCAN domains 1                       | 1.32  | 0.037779 |
| 213858_at   | ZNF250  | zinc finger protein 250                                        | -1.08 | 0.019944 |
| 207753_at   | ZNF304  | zinc finger protein 304                                        | 1.18  | 0.045855 |
| 215767_at   | ZNF804A | zinc finger protein 804A                                       | 1.1   | 0.034192 |
| 215461_at   | ZNRF4   | zinc and ring finger 4                                         | -1.16 | 0.007018 |
| 218639_s_at | ZXDC    | ZXD family zinc finger C                                       | 1.06  | 0.047562 |
| 212601_at   | ZZEF1   | zinc finger, ZZ-type with EF-hand domain 1                     | 1.26  | 0.01257  |

Table S5: Selected gene ontology GO categories significantly affected by heavy smokers compared with light smokers.

| Group | GO ID      | GO categories | GO term                                                                                                                                          | Group P value | Term P value | % Associated Genes | Associated Genes Found                                |
|-------|------------|---------------|--------------------------------------------------------------------------------------------------------------------------------------------------|---------------|--------------|--------------------|-------------------------------------------------------|
| 1     | GO:0002708 | BP            | positive regulation of lymphocyte mediated immunity                                                                                              | 4.87E-08      | 1.09E-07     | 15.0               | B2M, CD226, FOXP3, HFE, HLA-A, HLA-E, IL23A, PVR, TNF |
| 1     | GO:0001912 | BP            | positive regulation of leukocyte mediated cytotoxicity                                                                                           | 4.87E-08      | 6.90E-07     | 17.5               | B2M, CD226, HFE, HLA-A, HLA-E, IL23A, PVR             |
| 1     | GO:0002824 | BP            | positive regulation of adaptive immune response based on somatic recombination of immune receptors built from immunoglobulin superfamily domains | 4.87E-08      | 6.34E-08     | 14.8               | B2M, CD226, FOXP3, HFE, HLA-A, HLA-E, IL23A, PVR, TNF |
| 1     | GO:0002711 | BP            | positive regulation of T cell mediated immunity                                                                                                  | 4.87E-08      | 6.90E-07     | 17.5               | B2M, FOXP3, HFE, HLA-A, HLA-E, IL23A, PVR             |
| 2     | GO:0045066 | BP            | regulatory T cell differentiation                                                                                                                | 6.03E-06      | 5.85E-04     | 25.0               | FOXP3, IRF1, NCOR1                                    |
| 2     | GO:0031063 | BP            | regulation of histone deacetylation                                                                                                              | 6.03E-06      | 1.26E-04     | 20.0               | CTBP1, FOXP3, NCOR1, PRKD2                            |
|       | GO:0032770 | BP            | positive regulation of monooxygenase activity                                                                                                    |               | 9.39E-05     | 22.2               | APOE, ESR1, PTK2B, TNF                                |
|       | GO:0033005 | BP            | positive regulation of mast cell activation                                                                                                      |               | 6.72E-04     | 23.1               | CD226, CRHR1, SYK                                     |
|       | GO:0046006 | BP            | regulation of activated T cell proliferation                                                                                                     |               | 9.46E-05     | 14.3               | FOXP3, ICOSLG, IGFBP2, IL23A, NCOA6                   |
|       | GO:0016514 | CC            | SWI/SNF complex                                                                                                                                  |               | 6.42E-05     | 26.7               | SMARCA2, SMARCB1, SMARCC2, SMARCD2                    |

Table S6: Significant genes adjusted for age, race, and gender among smokers

| Symbol   | <i>P</i> value | Symbol  | <i>P</i> value | Symbol    | <i>P</i> value |
|----------|----------------|---------|----------------|-----------|----------------|
| ABAT     | 0.013812       | CD19    | 0.012946       | DVL1      | 0.015047       |
| ABCG1    | 0.018317       | CD22    | 0.006198       | DYNC1H1   | 0.016846       |
| ABR      | 0.038099       | CD226   | 0.033447       | DZIP1     | 0.030158       |
| ACTG1    | 0.004767       | CD24    | 0.003927       | EHBP1L1   | 0.037899       |
| ADAM28   | 0.01815        | CD72    | 0.015296       | EHD1      | 0.004701       |
| ADAMTS13 | 0.03581        | CD79A   | 0.003984       | EIF3B     | 0.002934       |
| ADD1     | 0.041045       | CD79B   | 0.010824       | ELMO2     | 0.032143       |
| ALOX12P2 | 0.031775       | CD97    | 0.038437       | EML2      | 0.022202       |
| APOBR    | 0.040184       | CDC25A  | 0.034124       | EMP1      | 0.030918       |
| ARHGAP17 | 0.00752        | CELF1   | 0.014182       | EPB41L2   | 0.036477       |
| ARHGAP25 | 0.034076       | CELF2   | 0.018516       | EPHA1     | 0.030339       |
| ARHGEF9  | 0.039759       | CHERP   | 0.029433       | EPN2      | 0.037982       |
| ARMCX1   | 0.016912       | CHML    | 0.030926       | ERMAP     | 0.001913       |
| ASPHD1   | 0.020469       | CIDEA   | 0.021967       | ESR1      | 0.045689       |
| ATP12A   | 0.036145       | CLEC4M  | 0.011485       | EXOC3     | 0.022562       |
| AURKC    | 0.045982       | COL2A1  | 0.043544       | FA2H      | 0.026191       |
| B2M      | 0.015515       | COPS7A  | 0.031591       | FAM53B    | 0.0248         |
| B4GALNT1 | 0.010325       | CRHR1   | 0.044699       | FAP       | 0.027327       |
| B4GALT1  | 0.00225        | CRYAA   | 0.009695       | FBXO46    | 0.023435       |
| BAG6     | 0.041357       | CRYBA4  | 0.010718       | FGF3      | 0.032265       |
| BANP     | 0.014584       | CSHL1   | 0.019195       | FOXE1     | 0.022938       |
| BCL11A   | 0.008311       | CSK     | 0.02214        | GAK       | 0.038101       |
| BCL7A    | 0.022542       | CSNK1D  | 0.037754       | GATAD2A   | 0.043499       |
| BIN1     | 0.00932        | CTBP1   | 0.049416       | GCDH      | 0.027358       |
| BIN3     | 0.005875       | CXXC1   | 0.016449       | GHRHR     | 0.040397       |
| BLK      | 0.00246        | CYP2C18 | 0.027754       | GIP       | 0.015228       |
| BSDC1    | 0.02384        | CYP2D6  | 0.025825       | GJB3      | 0.022951       |
| BTN2A2   | 0.034102       | DAG1    | 0.032422       | GLT8D2    | 0.033068       |
| BUB1     | 0.012925       | DAZAP2  | 0.033209       | GM2A      | 0.046943       |
| C11orf9  | 0.021566       | DCAF13  | 0.04604        | GMEB2     | 0.044828       |
| C12orf43 | 0.011714       | DCAF7   | 0.026779       | GOLGB1    | 0.016543       |
| C12orf51 | 0.009368       | DCXR    | 0.025495       | GON4L     | 0.003144       |
| C17orf80 | 0.003859       | DENND2A | 0.027875       | GPD2      | 0.045856       |
| C1RL     | 0.006306       | DFNA5   | 0.041489       | GULP1     | 0.048076       |
| CAMSAP2  | 0.030425       | DGCR14  | 0.026837       | HFE       | 0.026777       |
| CAMTA2   | 0.028907       | DHRS2   | 0.0138         | HIST1H2AC | 0.042354       |
| CAPN9    | 0.015171       | DHX16   | 0.020628       | HIST1H2BC | 0.030186       |
| CASP8    | 0.020337       | DLAT    | 0.005526       | HIST1H3A  | 0.026807       |
| CBFA2T3  | 0.019846       | DNTT    | 0.011368       | HLA-DOB   | 0.017418       |
| CBX5     | 0.011166       | DST     | 0.017902       | HLA-DQB1  | 0.046151       |

|           |          |         |          |          |          |
|-----------|----------|---------|----------|----------|----------|
| HLA-F     | 0.026175 | MAST4   | 0.029906 | PFAS     | 0.021818 |
| HLF       | 0.037797 | MAT2A   | 0.015817 | PHKG1    | 0.04743  |
| HOXD12    | 0.013774 | MCAM    | 0.004885 | PI4KB    | 0.005788 |
| HOXD13    | 0.032693 | MED24   | 0.026585 | PILRB    | 0.049759 |
| HRASLS2   | 0.007005 | MEFV    | 0.012435 | PKP4     | 0.00419  |
| HTR2B     | 0.014899 | MGA     | 0.030801 | PLA2G6   | 0.047263 |
| HTR3A     | 0.00719  | MIR4784 | 0.047092 | PLAGL1   | 0.017743 |
| IDS       | 0.016402 | MON1B   | 0.036011 | PLCG2    | 0.044096 |
| IGFBP2    | 0.023636 | MSANTD3 | 0.047407 | PMS2P3   | 0.030162 |
| IGFLR1    | 0.012537 | MSX2    | 0.041907 | POLD4    | 0.022214 |
| IGHD      | 8.08E-05 | MTERF   | 0.021009 | PPP1R15A | 0.043979 |
| IGHM      | 0.004087 | MTF1    | 0.041188 | PPP4C    | 0.018848 |
| IL16      | 0.029849 | MTG1    | 0.021365 | PPP6R2   | 0.017204 |
| IL21R     | 0.049877 | MUTYH   | 0.018805 | PROSC    | 0.030614 |
| IL23A     | 0.000549 | MYF6    | 0.031706 | PRPF6    | 0.026371 |
| ING4      | 0.028941 | NAA60   | 0.01286  | PRPH     | 0.025248 |
| INTS1     | 0.048443 | NAALAD2 | 0.049786 | PRSS2    | 0.012382 |
| IRF3      | 0.02538  | NAPG    | 0.00613  | PRUNE2   | 0.049038 |
| IRX4      | 0.006807 | NCAM1   | 0.023302 | PSCA     | 0.036853 |
| ISCA1     | 0.023463 | NCOR1   | 0.031761 | PTK2B    | 0.049656 |
| ITGB7     | 0.029135 | NDRG4   | 0.027915 | PTPRB    | 0.032258 |
| ITPR3     | 0.03037  | NFYC    | 0.021429 | PVR      | 0.031656 |
| KCNAB3    | 0.039014 | NUP62   | 0.027939 | QKI      | 0.016045 |
| KDM3B     | 0.019774 | OPN3    | 0.049491 | RABEP2   | 0.017614 |
| KIAA0040  | 0.005965 | OPRK1   | 0.040108 | RABGAP1  | 0.02075  |
| KIAA0146  | 0.022127 | OR51E2  | 0.020218 | RABL2A   | 0.032144 |
| KIAA0408  | 0.031432 | P2RX2   | 0.022933 | RAD54L2  | 0.049086 |
| KIF4A     | 0.024396 | PADI3   | 0.020437 | RASA4    | 0.044426 |
| KLHL22    | 0.036561 | PALLD   | 0.026228 | RBFOX1   | 0.033122 |
| KLK3      | 0.010319 | PAOX    | 0.030715 | RFC3     | 0.016791 |
| KMO       | 0.027469 | PAX8    | 0.031345 | RHBDF2   | 0.036393 |
| KPNA6     | 0.021666 | PCGF3   | 0.005078 | RIMS2    | 0.01308  |
| LIMCH1    | 0.014239 | PCSK7   | 0.010781 | RNASET2  | 0.041213 |
| LIN7B     | 0.038171 | PDCD6   | 0.024399 | RPLP2    | 0.00897  |
| LPPR3     | 0.037524 | PDCL    | 0.01639  | RPS19    | 0.037361 |
| LPPR4     | 0.046062 | PDE3A   | 0.026318 | S100A13  | 0.037125 |
| LRRC47    | 0.017243 | PDE4B   | 0.017371 | SCAND1   | 0.038241 |
| LTBP2     | 0.045055 | PDE6C   | 0.031883 | SDC2     | 0.016779 |
| MAP7      | 0.03615  | PDXK    | 0.029743 | SDF4     | 0.030569 |
| MAPK1IP1L | 0.047836 | PEF1    | 0.044794 | SEC24C   | 0.033329 |

|         |          |          |          |
|---------|----------|----------|----------|
| SETBP1  | 0.035485 | TMEM70   | 0.026456 |
| SF3B3   | 0.039579 | TMPRSS5  | 0.028334 |
| SFXN3   | 0.041878 | TNF      | 0.03922  |
| SH3BGR  | 0.015584 | TNFRSF21 | 0.033036 |
| SHMT2   | 0.021296 | TOM1L1   | 0.034602 |
| SHOX2   | 0.020216 | TRAK1    | 0.038974 |
| SIGIRR  | 0.035148 | TRANK1   | 0.046405 |
| SIPA1   | 0.023273 | TULP4    | 0.03231  |
| SKIV2L  | 0.023133 | TYW1     | 0.0352   |
| SLC12A4 | 0.003349 | UBA1     | 0.043105 |
| SLC6A14 | 0.049631 | UBR4     | 0.040495 |
| SMARCC2 | 0.029325 | UBTD1    | 0.021484 |
| SNCG    | 0.016376 | UCKL1    | 0.011746 |
| SP110   | 0.034638 | UPF1     | 0.045813 |
| SPAM1   | 0.039171 | UPK3B    | 0.047508 |
| SPECC1L | 0.001083 | USP11    | 0.035534 |
| SPIB    | 0.004636 | USP33    | 0.038454 |
| SQLE    | 0.013849 | VPREB3   | 0.003816 |
| SS18    | 0.030258 | VPS13D   | 0.031442 |
| STC1    | 0.042317 | VPS37B   | 0.025121 |
| STK10   | 0.028505 | VRK3     | 0.004152 |
| STX2    | 0.0197   | WDR55    | 0.027808 |
| SYK     | 0.0229   | ZFP36L2  | 0.021344 |
| SYP     | 0.013773 | ZHX2     | 0.019437 |
| TAS2R1  | 0.04748  | ZKSCAN1  | 0.036963 |
| TBCD    | 0.009166 | ZNF250   | 0.038896 |
| TCF21   | 0.031964 | ZNRF4    | 0.012199 |
| TCL1A   | 0.010359 | ZXDC     | 0.04581  |
| TF      | 0.032783 | ZZEF1    | 0.022769 |
| TFEB    | 0.049586 |          |          |
| TGFBR2  | 0.04557  |          |          |
| TGOLN2  | 0.04771  |          |          |
| THAP7   | 0.035754 |          |          |
| TIMM17A | 0.045321 |          |          |
| TINF2   | 0.00552  |          |          |
| TKTL1   | 0.031103 |          |          |
| TLE3    | 0.036992 |          |          |
| TMCC1   | 0.002152 |          |          |
| TMEM134 | 0.043938 |          |          |
| TMEM2   | 0.010697 |          |          |

---



Table S7: The significant IPA canonical pathways assignment for the set of CSC-stimulated genes

| Canonical Pathways                                    | <i>P</i> value | Molecules                                                                                                                                                                     |
|-------------------------------------------------------|----------------|-------------------------------------------------------------------------------------------------------------------------------------------------------------------------------|
| NRF2-mediated Oxidative Stress Response               | 7.07946E-05    | FTL,NQO2,PIK3R5,GCLC,DNAJB2,MAFG,HMOX1,JUN,KEAP1,VCP,UBE2K,GCLM,DNAJB1,TXN,DNAJC16,SOD1,NQO1,DNAJC1,DNAJB9,MAFF,TXNRD1,GSR,SQSTM1,DNAJB6,FTH1,EPHX1                           |
| Inosine-5'-phosphate Biosynthesis II                  | 0.000269153    | ADSL,PAICS,ATIC                                                                                                                                                               |
| Role of CHK Proteins in Cell Cycle Checkpoint Control | 0.000676083    | E2F6,PCNA,PPP2R2B,PPP2R5B,ATMIN,E2F5,SLC19A1,RFC1,TLK2,PPP2R5A,NBN                                                                                                            |
| Purine Nucleotides De Novo Biosynthesis II            | 0.003981072    | ADSL,PAICS,PPAT,ATIC                                                                                                                                                          |
| Protein Ubiquitination Pathway                        | 0.003981072    | USP18,USP12,UBE2A,PSMD7,UBR2,UBE2N,USP20,DNAJB2,PSMB8,USP2,USP3,UCHL1,USP47,PSMD14,DNAJB1,DNAJC16,PSMB9,DNAJC1,PSMA1,DNAJB9,SKP2,HSPA12A,PSMB7,PSMD2,PSMB1,PSMD1,PSMD4,DNAJB6 |
| Aryl Hydrocarbon Receptor Signaling                   | 0.005370318    | TRIP11,CYP1A1,NQO2,POLA1,NQO1,CYP1B1,NCOA3,TGM2,ALDH1A1,JUN,CCND2,NCOA2,RARB,ALDH18A1,RXR,ESR1,MCM7                                                                           |
| PXR/RXR Activation                                    | 0.00676083     | ABCB1,ALDH1A1,CYP3A4,NR1I2,FOXO3,ABCB11,CYP2C9,INSR,SULT2A1,CYP2C8                                                                                                            |
| Phosphatidylcholine Biosynthesis I                    | 0.007762471    | CEPT1,CHPT1,PHKA1                                                                                                                                                             |
| Choline Biosynthesis III                              | 0.007762471    | HMOX1,CEPT1,CHPT1,PHKA1                                                                                                                                                       |
| Dermatan Sulfate Degradation (Metazoa)                | 0.007762471    | MGEA5,IDS,GM2A,HEXB                                                                                                                                                           |
| VDR/RXR Activation                                    | 0.01023293     | SERPIN1,YY1,TNFSF11,LRP5,NCOA2,PDGFA,RXR,CALB1,HSD17B2,NCOA3,SULT2A1                                                                                                          |
| PDGF Signaling                                        | 0.01023293     | CSNK2A2,JUN,INPP5F,PDGFA,SOS2,SRF,PIK3R5,CRK,EIF2AK2,STAT1,CAV3                                                                                                               |
| Glutathione Biosynthesis                              | 0.012022644    | GCLC,GCLM                                                                                                                                                                     |
| Calcium Transport I                                   | 0.016982437    | ATP2C1,ATP2A2,ATP2B4                                                                                                                                                          |
| Mismatch Repair in Eukaryotes                         | 0.016982437    | PCNA,SLC19A1,FEN1,RFC1                                                                                                                                                        |
| Bupropion Degradation                                 | 0.019952623    | CYP1A1,CYP3A4,CYP2C9,CYP1B1,CYP2C8                                                                                                                                            |
| Heme Degradation                                      | 0.022908677    | HMOX1,BLVRB                                                                                                                                                                   |
| $\alpha$ -tocopherol Degradation                      | 0.022908677    | CYP4F3,CYP4A11                                                                                                                                                                |
| Cell Cycle Regulation by BTG Family Proteins          | 0.023442288    | E2F6,PPP2R2B,BTG2,PPP2R5B,E2F5,PPP2R5A                                                                                                                                        |
| Acetone Degradation I (to Methylglyoxal)              | 0.023442288    | CYP1A1,CYP3A4,CYP2C9,CYP1B1,CYP2C8                                                                                                                                            |
| Epithelial Adherens Junction Signaling                | 0.023988329    | CTNNA1,CRK,TCF3,ACVR1B,CLIP1,APC,PTEN,MET,ACTR3,WAS,ARPC2,KEAP1,MYL4                                                                                                          |

|                                                                 |             |                                                                                                                                                                  |
|-----------------------------------------------------------------|-------------|------------------------------------------------------------------------------------------------------------------------------------------------------------------|
|                                                                 |             | ,SSX2IP,LEF1,ACTN1                                                                                                                                               |
| Cyclins and Cell Cycle Regulation                               | 0.02630268  | E2F6,CCNH,CDKN2D,CCND2,PPP2R2B,HDAC1,PPP2R5B,E2F5,PPP2R5A,SKP2                                                                                                   |
| Clathrin-mediated Endocytosis Signaling                         | 0.027542287 | APOM,APOB,EPS15,PICALM,PDGFA,CHP1,PIK3R5,SH3GLB1,HIP1,MET,CSNK2A2,LDLR,ACTR3,ARRB1,IGF1,PIP5K1C,ARPC2,RAB11A,SERPINA1                                            |
| Estrogen Biosynthesis                                           | 0.030199517 | CYP1A1,CYP3A4,CYP2C9,HSD17B2,CYP1B1,CYP2C8                                                                                                                       |
| dTMP De Novo Biosynthesis                                       | 0.036307805 | TYMS,SHMT1                                                                                                                                                       |
| Folate Polyglutamylation                                        | 0.036307805 | SHMT1,MTHFD1                                                                                                                                                     |
| Fcγ Receptor-mediated Phagocytosis in Macrophages and Monocytes | 0.037153523 | MYO5A,HMOX1,FYN,ACTR3,WAS,ARPC2,VAMP3,RAB11A,CRK,FCGR1A,PTEN                                                                                                     |
| Chondroitin Sulfate Degradation (Metazoa)                       | 0.03801894  | MGEA5,GM2A,HEXB                                                                                                                                                  |
| Activation of IRF by Cytosolic Pattern Recognition Receptors    | 0.03801894  | DHX58,TRAF3,IKBKG,JUN,ZBP1,IKBKE,STAT1,IFNA6                                                                                                                     |
| Small Cell Lung Cancer Signaling                                | 0.038904514 | PIAS3,TRAF3,IKBKG,RARB,PIK3R5,IKBKE,RXRB,SKP2,PTEN                                                                                                               |
| Role of PKR in Interferon Induction and Antiviral Response      | 0.041686938 | TRAF3,IKBKG,IKBKE,EIF2AK2,STAT1,FCGR1A                                                                                                                           |
| Xenobiotic Metabolism Signaling                                 | 0.042657952 | ABCB1,CYP1A1,FTL,FMO3,NQO2,PPP2R5B,NQO1,PIK3R5,GCLC,CYP2C9,SULT2A1,PPP2R5A,CYP1B1,CHST1,HMOX1,ALDH1A1,CYP3A4,NR1I2,KEAP1,PPP2R2B,SULT1E1,ALDH18A1,SULT1B1,CYP2C8 |
| AMPK Signaling                                                  | 0.043651583 | TSC1,LEP,PPP2R5B,PIK3R5,CFTR,PFKFB2,PPP2R5A,PPP2R2B,IRS2,PPM1A,INSR,AK2,CHRNA3,PPAT                                                                              |
| IGF-1 Signaling                                                 | 0.047863009 | CSNK2A2,JUN,IGF1,SOS2,FOXO3,SOCS2,SRF,PIK3R5,IRS2,IGFBP7,SFN                                                                                                     |
